# Supplementary material for: Genome-wide identification of calcium-dependent protein kinase (CDPK) family members in Phaseolus vulgaris L. and expression analysis during abiotic stresses
Source: PeerJ. 2025 Oct 20;13:e20217. doi: 10.7717/peerj.20217 (PMC12548640; doi:10.7717/peerj.20217)
Supplement: Supplemental Information 1 [file peerj-13-20217-s001.xlsx]

## Sheet: Sequence
PvGene Name	Arabidopsis ortholog locus	Phytozome ID	Chromosome Name	Strand	Gene Start (bp)	Gene End (bp)	Genomic	Transcript	CDS Region	Peptide	EF-hand No (Prosite)	Myristoylaton motif (Expasy-Myristoylator)	Palmitoylation prediction (CSS-Palm 4.0)	HMMER Domain
PvCDPK1.1	AT5G04870 (AtCPK1)	Phvul.001G197700.1	PvChr1	forward	45693570	45697541	AATCATTCACCTTCTTATTCTTCCTTTTCTTCAAATCTCCACTGATTCTTCTTTTCATGTTCACGTGCACGCTTTAGGCTATAGTGGGGTTGGTGCAGAAAATCGAATGTGATTTTGGGCTTCACTTGCTTCTTGCTTCTTACATGCAAGTCACAGACAGGAAGTAACAAGTGCAGGATGGGAAACAATTGTGTCGGGTCAAAAATCTCGGATTATGCACTGCTTTCCTGTGTTCTTCCGAGTTCATTCGTGTGGCTTCATCATCATCAAACGAGGGTGGTCACAGAAATTTCTGATGCCACTTCACTTGTGACTAAAATTGAAGACACAAATGCTCTAGAGAATGTTCAGGAAAAGGCTCCACGAGTGGTGAAAATTAGCAAAGAGAGTAACATGCCT…	AATCATTCACCTTCTTATTCTTCCTTTTCTTCAAATCTCCACTGATTCTTCTTTTCATGTTCACGTGCACGCTTTAGGCTATAGTGGGGTTGGTGCAGAAAATCGAATGTGATTTTGGGCTTCACTTGCTTCTTGCTTCTTACATGCAAGTCACAGACAGGAAGTAACAAGTGCAGGATGGGAAACAATTGTGTCGGGTCAAAAATCTCGGATTATGCACTGCTTTCCTGTGTTCTTCCGAGTTCATTCGTGTGGCTTCATCATCATCAAACGAGGGTGGTCACAGAAATTTCTGATGCCACTTCACTTGTGACTAAAATTGAAGACACAAATGCTCTAGAGAATGTTCAGGAAAAGGCTCCACGAGTGGTGAAAATTAGCAAAGAGAGTAACATGCCT…	ATGGGAAACAATTGTGTCGGGTCAAAAATCTCGGATTATGCACTGCTTTCCTGTGTTCTTCCGAGTTCATTCGTGTGGCTTCATCATCATCAAACGAGGGTGGTCACAGAAATTTCTGATGCCACTTCACTTGTGACTAAAATTGAAGACACAAATGCTCTAGAGAATGTTCAGGAAAAGGCTCCACGAGTGGTGAAAATTAGCAAAGAGAGTAACATGCCTTCAGAGCCTGCAATTAAAAAATTAGCCTTTAAAGTGAAGAGGGTAGCAATAGGGCTTCAAGAAGAGTCAATTTTGAAGAGAAAAAGTGGTCACTTTAAGGAGTACTATAATTTGGGAGAAGAGCTTGGAAAGGGACAGTACGGAACAACATTCCTTTGTACTGAGAAAGCAACTGGG…	MGNNCVGSKISDYALLSCVLPSSFVWLHHHQTRVVTEISDATSLVTKIEDTNALENVQEKAPRVVKISKESNMPSEPAIKKLAFKVKRVAIGLQEESILKRKSGHFKEYYNLGEELGKGQYGTTFLCTEKATGKKYACKSIPKVKLLIDEDVEDVRREIEIMHHLEGCPNVISIKGAYEDGVAVFVVMELCEGGELFDRIVERGHYTERKAAKLARTIISIIEGCHSLGVMHRDLKPENFLFVDVNEDSTLKAIDFGMSVFFKPGDIFRDVVGSPYYIAPEVLRRHYGPEADVWSAGVIIYILLCGTAPFWGESEQEIFEEVLHGDIDFTSDPWPNISESARDLVRKMLVRDPRKRITAQEVLRHPWIQVDGVAPDMPLDSAVLSRLKQFSVMNKLKKM…	3	No	Yes	Pkinase (PF00069.28)-EF-hand_7 (PF13499.9)
PvCDPK1.2	AT5G04870 (AtCPK1)	Phvul.007G233900.1	PvChr7	forward	35767288	35774697	TTTTAGTAAATTAAATATGAATTTAATGAGATGAGAAATTAGAAATAGATAAAGGAAATTAAGGAAGGAGTGTAACATGGTCCAAGAGGTACAACACAAGAAGGAAACAAACCAGAAGAGTCGTATGTATGTATATCTACCAAACTGTCTTCGGCATTCATCGTCCTCAACTGACCAGGTAAACTCAAGCTTTGTCTATTCTCTTACTCTTTCTTTATGCTTCATTCTTCAACTTCTCTCTCTCTCTCTCTCTCTCTCTCTTCTAGCCACCCTTGACCTCTATTTTGTTTATCTTCATTTACGGTTTTTATAGTTTCTGATTTGTGCTCTTTTGAGTCTAATTTTTCTTTCTTTCAAAAGGGTGTCCTTGAAGTTGTATAAAGTTCGATTCTTTGTTCT…	TTTTAGTAAATTAAATATGAATTTAATGAGATGAGAAATTAGAAATAGATAAAGGAAATTAAGGAAGGAGTGTAACATGGTCCAAGAGGTACAACACAAGAAGGAAACAAACCAGAAGAGTCGTATGTATGTATATCTACCAAACTGTCTTCGGCATTCATCGTCCTCAACTGACCAGATGATGTAGGTTTTTAGATCCGAGTGATGAAAGTTGGATATTTATTAGCTGTAGCACAATTTTTTTCAGTGTGAAGCAATATGGGGAACACATGTACTGGTCCTAGCATTTCAAAAAATGGTTTGTTTCAATCAGTTTCTGCAGCAATTTGGCGGTCTCAATTGCCCGATGAATCAGTGTCTAATAGAGAATCTGTAAAAGAGGAAGCAACTAGTGTGCCC…	ATGGGGAACACATGTACTGGTCCTAGCATTTCAAAAAATGGTTTGTTTCAATCAGTTTCTGCAGCAATTTGGCGGTCTCAATTGCCCGATGAATCAGTGTCTAATAGAGAATCTGTAAAAGAGGAAGCAACTAGTGTGCCCGAATCGCCTTTGCCTGTCCAAAATAAACCTCCTGAGCAGATAACTATGCCGAAACCTGAAGCCAAACAAGAGGCAAAATCAGAAACAGAACCAGCACAGGGACAAGAGAAGAAGAAGCACAAGAAACATGGTTCTGTGAAGAGAGTTTCTAGTGCAGGGCTTCGAGTTGACTCTGTGTTGCAAAGAGAGACTGATAATTTCAAGGAGTTCTTCACTCTTGGGAGAAAACTTGGACAGGGTCAGTTTGGGACAACTTTC…	MGNTCTGPSISKNGLFQSVSAAIWRSQLPDESVSNRESVKEEATSVPESPLPVQNKPPEQITMPKPEAKQEAKSETEPAQGQEKKKHKKHGSVKRVSSAGLRVDSVLQRETDNFKEFFTLGRKLGQGQFGTTFLCVEKATGNEYACKSIAKRKLVTDDDVEDVRREIQIMHHLAGHPNVISIKGAYEDAVAVHVVMELCAGGELFDRIIQRGHYTERQAAELTRTIVGVVEACHSLGVMHRDLKPENFLFVNQLEDSLLKTIDFGLSVFFKPGDIFSDVVGSPYYVAPEVLRKRYGPEADVWSAGVILYILLSGVPPFWAENEQGIFEQVLRGDLDFSSDPWPNISESAKDLVRKMLVRDPRRRLTAHQVLCHPWIQVDGVAPDKPLDSAVLSRLKQFS…	4	No	Yes	Pkinase (PF00069.28)-EF-hand_7 (PF13499.9)-EF-hand_8 (PF13833.9)
PvCDPK2	AT3G10660 (AtCPK2)	Phvul.007G266100.1	PvChr7	reverse	38724008	38729058	GAGAGAGAGAGAGAGAAATATCACCGGCGAGGGTCTGCCGGTCGCCGGCGGTTGAGAACATTCTGAAAACAGATTGACAGACAGAGATTACAATTTGACCTAATGTCACATAACAACAACGACGTGACAACCTCGTTATGAAAACCTACCAAATCTCAACCGTCCACTCCAATTGTCGCACCCTTCTCAGCCCTCCGATCACCAACGCGTTTTCTCGGTTCTCTCGTTAGTTAATTTATTCCCTCCAACAGAAAAAACCGCCACAACCCTTTCTCCTCTCTTTCCCTCTTCATTCCACCTTCACAAGCTCTGGTTTTTCCCTCCCACCTTCACCATCACGCTTCAAAATCAAAACCCTTTTCCTTTTAAGCTGCATTTTCGTTCTCCTCTTCATCATTT…	GAGAGAGAGAGAGAGAAATATCACCGGCGAGGGTCTGCCGGTCGCCGGCGGTTGAGAACATTCTGAAAACAGATTGACAGACAGAGATTACAATTTGACCTAATGTCACATAACAACAACGACGTGACAACCTCGTTATGAAAACCTACCAAATCTCAACCGTCCACTCCAATTGTCGCACCCTTCTCAGCCCTCCGATCACCAACGCGTTTTCTCGGTTCTCTCGTTAGTTAATTTATTCCCTCCAACAGAAAAAACCGCCACAACCCTTTCTCCTCTCTTTCCCTCTTCATTCCACCTTCACAAGCTCTGGTTTTTCCCTCCCACCTTCACCATCACGCTTCAAAATCAAAACCCTTTTCCTTTTAAGCTGCATTTTCGTTCTCCTCTTCATCATTT…	ATGGGAAACAGCTGTGTTGGATCGAGAAGCAGTGCTGCTAATAACGGAACTCGTGGCTCCTCTGTTCCTAGTTCATACTGGTGGTGTTGTGGATACAAATATGGTTCTCATGCGTGCAAATGTGACAAAACGAACGCAAAAGCCACAGAAACTATTCAAGACATGCCTCCACAGATAGTGAGAATTGAGAGTGATGAGGTGAAGCCTCCTCATCGATACAAAGAGGAGAAGCCACCTTCGGAACAAACAAGGCCGCAGCCCAGGCCACACAATGTGAAGAAGCCGGCAAGTGCAGGGCTCAAAGCAGATTCTGTTTTGCAAAGGAAAACCGGTAACCTTAAGGAGTCTTACAATTTGGGAAAAAAGCTTGGACAGGGCCAGTTTGGAACTACTTTCCTC…	MGNSCVGSRSSAANNGTRGSSVPSSYWWCCGYKYGSHACKCDKTNAKATETIQDMPPQIVRIESDEVKPPHRYKEEKPPSEQTRPQPRPHNVKKPASAGLKADSVLQRKTGNLKESYNLGKKLGQGQFGTTFLCVEKATGKEYACKSILKRKLMTEEDVEDVRREIQIMHHLAGSANVISIKEAFEDAVSVHVVMELCAGGELFDRIVERGHYSERKAAKLARTIVGVIESCHSLGVMHRDLKPENFLFVNQQEESPLKAIDFGLSAFFKPGEIFSDVVGSPYYVAPEVLRKRYGPEADVWSAGVIIYILLSGVPPFWGETEQEIFDAILRFQLDFSSDPWPSISASAKDLVRKMLVRDPSKRITAFDVLRHPWIQVDGEAPDKPLDSAVLSRLKQFYA…	4	No	Yes	Pkinase (PF00069.28)-EF-hand_7 (PF13499.9)
PvCDPK3.1	AT4G23650 (AtCPK3)	Phvul.002G161200.1	PvChr2	reverse	31597834	31604224	ACACTTTTAGTTTGAATGAGCGTTAGATGTAAAAGCAATGGTTGAGATAAGTGATGCAGAGGAAGCACAGGCGCAGAGGATACAAGTGCATTGGAATCTGTGTGTGTACCAAAAAGAACGTTTAATTTTCACGAAGAAGAGAAGCAGTTGCAGAACCTCACTAACTCTACGACGCCGTTTCAATGGGAAACTCTAACAGCCAAGCTTATTCCCAAACGCAGCCACATTCCGAGCATCACCAGCATCAACCCCAACCTTCCAACGGCGTCAGCGTCCTCCCTCCCAATTCCAAGCCCACCGTGGGCCGGGTCCTGGACCGGCCCATGGAGGACGTCCGCTCCGATTACATATTCGGGCGCGAGCTGGGCCGCGGGCAATTCGGCGTCACCTACTCAGTGA…	ACACTTTTAGTTTGAATGAGCGTTAGATGTAAAAGCAATGGTTGAGATAAGTGATGCAGAGGAAGCACAGGCGCAGAGGATACAAGTGCATTGGAATCTGTGTGTGTACCAAAAAGAACGTTTAATTTTCACGAAGAAGAGAAGCAGTTGCAGAACCTCACTAACTCTACGACGCCGTTTCAATGGGAAACTCTAACAGCCAAGCTTATTCCCAAACGCAGCCACATTCCGAGCATCACCAGCATCAACCCCAACCTTCCAACGGCGTCAGCGTCCTCCCTCCCAATTCCAAGCCCACCGTGGGCCGGGTCCTGGACCGGCCCATGGAGGACGTCCGCTCCGATTACATATTCGGGCGCGAGCTGGGCCGCGGGCAATTCGGCGTCACCTACTCAGTGA…	ATGGGAAACTCTAACAGCCAAGCTTATTCCCAAACGCAGCCACATTCCGAGCATCACCAGCATCAACCCCAACCTTCCAACGGCGTCAGCGTCCTCCCTCCCAATTCCAAGCCCACCGTGGGCCGGGTCCTGGACCGGCCCATGGAGGACGTCCGCTCCGATTACATATTCGGGCGCGAGCTGGGCCGCGGGCAATTCGGCGTCACCTACTCAGTGACTCACAAGCACACCAACGAAAACTTGGCGTGCAAATCCATTGCCAAGCGCAAACTCCACCGCGACGACTTGGAAGACGTCCGTCGCGAGGTGCAGATCATGCACCACCTAACCGGCCACCGAAACATCGTCGAGCTTAAGGGAGCCTGCGAGGACCGACATTCCGTCAATCTCGTCATGGAG…	MGNSNSQAYSQTQPHSEHHQHQPQPSNGVSVLPPNSKPTVGRVLDRPMEDVRSDYIFGRELGRGQFGVTYSVTHKHTNENLACKSIAKRKLHRDDLEDVRREVQIMHHLTGHRNIVELKGACEDRHSVNLVMELCAGGELFDRIIAKGHYSERAAADLCRQIATVIHDCHSMGVMHRDLKPENFLFLGKEENSPLKATDFGLSVFFKPGDVFKDLVGSAYYVAPEVLRKSYGPEADIWSAGVILFILLSGVPPFRAGNEQGIFDAILLGYINFASDHWSSISSSAKDLVKNMLRADPKKRLSAVEVLNHPWLREDGASDKPLDITVLTRMKQFRAMNKLKKVALKVIAENLSEEEIIGLKEMFKSMDTDNNGTITFEELKAGLPKLGTKISESEVSQLM…	4	Yes	Yes	Pkinase (PF00069.28)-EF-hand_7 (PF13499.9)
PvCDPK3.2	AT4G23650 (AtCPK3)	Phvul.002G294500.1	PvChr2	reverse	46343902	46352694	GTTTAATGTAAATATTTGAAAGTCCTGTGCCGGCCACCTAGTTTTAAACCCCGACACACTTAGTCTTCTTCTGACCAACCAAACCTCTGACTCCGACCGCCACAGTTCTCTTCATTGACCTCAGTCCATGGGTAACTGCAGCAGCAGCCACGGCGGCGGTGGCACGCCCGCTACTTCCACTTACTCCGACGAACTTCCCCAGCGCAACGGCATCACCGTCCTACCTCCGAACACGAACCCTTCACCCCCACTCCCGAAGCCCCAAGCGTCGTCCTCGCTGGGCCGCGTGCTGGGCCGGCCCATGGAGGACGTCCGGTCCATTTACATCTTCGGGCGCGAGCTGGGCCGCGGGCAGTTCGGCGTGACGTACCTGGTGACCCACAAGGTCACGAAGGAGCA…	GTTTAATGTAAATATTTGAAAGTCCTGTGCCGGCCACCTAGTTTTAAACCCCGACACACTTAGTCTTCTTCTGACCAACCAAACCTCTGACTCCGACCGCCACAGTTCTCTTCATTGACCTCAGTCCATGGGTAACTGCAGCAGCAGCCACGGCGGCGGTGGCACGCCCGCTACTTCCACTTACTCCGACGAACTTCCCCAGCGCAACGGCATCACCGTCCTACCTCCGAACACGAACCCTTCACCCCCACTCCCGAAGCCCCAAGCGTCGTCCTCGCTGGGCCGCGTGCTGGGCCGGCCCATGGAGGACGTCCGGTCCATTTACATCTTCGGGCGCGAGCTGGGCCGCGGGCAGTTCGGCGTGACGTACCTGGTGACCCACAAGGTCACGAAGGAGCA…	ATGGGTAACTGCAGCAGCAGCCACGGCGGCGGTGGCACGCCCGCTACTTCCACTTACTCCGACGAACTTCCCCAGCGCAACGGCATCACCGTCCTACCTCCGAACACGAACCCTTCACCCCCACTCCCGAAGCCCCAAGCGTCGTCCTCGCTGGGCCGCGTGCTGGGCCGGCCCATGGAGGACGTCCGGTCCATTTACATCTTCGGGCGCGAGCTGGGCCGCGGGCAGTTCGGCGTGACGTACCTGGTGACCCACAAGGTCACGAAGGAGCAGTTCGCGTGCAAGTCGATCGCAACGCGCAAGCTCGTGAACCGCGACGATATCGATGACGTCCGGCGCGAGGTCCAGATCATGCATCACCTCACCGGCCACCGCAACATCGTGGAGCTCAAGGGCGCC…	MGNCSSSHGGGGTPATSTYSDELPQRNGITVLPPNTNPSPPLPKPQASSSLGRVLGRPMEDVRSIYIFGRELGRGQFGVTYLVTHKVTKEQFACKSIATRKLVNRDDIDDVRREVQIMHHLTGHRNIVELKGAYEDRHSVNLIMELCAGGELFDRIITKGHYSERAAANSCRQIVTVVHNCHSMGVMHRDLKPENFLLLNKDDDSPLKATDFGLSVFFKPGDVFRDLVGSAYYVAPEVLRKSYGPEADIWSAGVILYILLSGVPPFWAENEQGIFDAILRGHIDFASDPWPSISTSAKDLVKKMLRADPKERLSAVEVLNHPWMRVDGDASDKPLDIAVLSRMKQFRAMNKLKKVALKVIAESLSEEEIIGLKEMFKSMDTDNSGTITFEELKAGLPKL…	4	Yes	Yes	Pkinase (PF00069.28)-EF-hand_7 (PF13499.9)
PvCDPK4.1	AT4G09570 (AtCPK4)	Phvul.007G089200.1	PvChr7	forward	9217140	9221899	CTATGATTTCATATCCTCCATCTAAACAAAAATAGTTATAGCTTTCACAATTTGAAAAAGTTAAATAAACTCTGATCAATAATAACATATCATCACATTCATTCATTCATACCTCCCCCCACAGAAACATTTTGGAGTTCAAGCAAAATGCAGAGGAATCCTCATGCATCCAAACGTAGCGTGTTACCGCATATAACACCGAGACTAAGGGACCGCTACGTTCTGGGGAAGAAGCTGGGACAAGGCCAATTTGGGACCACTTATCTGTGCACGCACAAGACCACGGGGAAGCTCTTGGCATGCAAATCAATCCCCAAGAGAAAGCTTCTCTGTCAGGAGGATTATGATGACGTGTGGAGGGAGATTAAGATCATGCACCATTTGTCGGAGCATCCCAAC…	CTATGATTTCATATCCTCCATCTAAACAAAAATAGTTATAGCTTTCACAATTTGAAAAAGTTAAATAAACTCTGATCAATAATAACATATCATCACATTCATTCATTCATACCTCCCCCCACAGAAACATTTTGGAGTTCAAGCAAAATGCAGAGGAATCCTCATGCATCCAAACGTAGCGTGTTACCGCATATAACACCGAGACTAAGGGACCGCTACGTTCTGGGGAAGAAGCTGGGACAAGGCCAATTTGGGACCACTTATCTGTGCACGCACAAGACCACGGGGAAGCTCTTGGCATGCAAATCAATCCCCAAGAGAAAGCTTCTCTGTCAGGAGGATTATGATGACGTGTGGAGGGAGATTAAGATCATGCACCATTTGTCGGAGCATCCCAAC…	ATGCAGAGGAATCCTCATGCATCCAAACGTAGCGTGTTACCGCATATAACACCGAGACTAAGGGACCGCTACGTTCTGGGGAAGAAGCTGGGACAAGGCCAATTTGGGACCACTTATCTGTGCACGCACAAGACCACGGGGAAGCTCTTGGCATGCAAATCAATCCCCAAGAGAAAGCTTCTCTGTCAGGAGGATTATGATGACGTGTGGAGGGAGATTAAGATCATGCACCATTTGTCGGAGCATCCCAACGTTGTTCGGATAAAGGCCACGTACGAGGATTCTGTGTTCGTGCACCTTGTGATGGAGCTGTGTGCCGGGGGTGAGCTTTTTGACAGGATCATTCAGAAGGGGCATTACAGCGAGAAAGAGGCTGCAAAGTTGATAAAGACCATTGTT…	MQRNPHASKRSVLPHITPRLRDRYVLGKKLGQGQFGTTYLCTHKTTGKLLACKSIPKRKLLCQEDYDDVWREIKIMHHLSEHPNVVRIKATYEDSVFVHLVMELCAGGELFDRIIQKGHYSEKEAAKLIKTIVGVVEGCHSLGVMHRDLKPENFLFDTPGEDAKMMATDFGLSVFYKPGQAFHDVVGSPYYVAPEVLCKQYGPEVDVWSAGVILYILLSGVPPFWAESEAGIFRQIINGELDFVSEPWPSISENAKELVKQMLERDPKKRISAHEVLCNPWIVDDIAPDKPLDSAVLTRLKHFSAMNKLKKMALRVIAERLSEEEIGGLKELFKMIDTDNSGTITFEELKEGLKSVGSNLMESEIKSLMEAADIDNSGTIDYGEFLAATLHLNKMEREE…	4	No	Yes	Pkinase (PF00069.28)-EF-hand_7 (PF13499.9)
PvCDPK4.2	AT4G09570 (AtCPK4)	Phvul.007G089301.1	PvChr7	forward	9223593	9231935	TCCATAGGGATCTTAAACCTGAAAATTTCTTGTTTGATACCCCTGCCAGTAAGGCCACCCTCAAGGTCATCGATTTTGGCTTCTCTGTCTTCTTTAAACCAGGTTCTATTCATCTCTTATATTCAATTCAATTTTATAATGCGTCCATTTTTGCCTATGAATTTGTCTATGAAACTCATCAAATTACCTCCCATGGAAGTAAATATGTGTAGTGTAACAGGTCCACACATTATTACTGTGAATCAACTTCAACACATTTGTTGTCTTTGCCTTGGGTTTAGCTGCGTGCTTACCCTTGACATGGATATAAAAAATAGAGAAATCTTAAATGCGCAATTTAATGAACCTCTCAGTCTAGGATTTAGAAATGTTCCCCAAATGTCTATGTCTAATTTACAA…	TCCATAGGGATCTTAAACCTGAAAATTTCTTGTTTGATACCCCTGCCAGTAAGGCCACCCTCAAGGTCATCGATTTTGGCTTCTCTGTCTTCTTTAAACCAGGACAAACCTTTAGTGATATAGTAGGAACTTGCTACTATATGGCCCCAGAGGTGTTGTGCAAACAATCTGGACCAGAAGTGGACGTTTGGAGTGCTGGTGTTATTCTGTACATCTTACTGAGAGGGCTCCCACCTTTCTGGGCAAAATCCGAATCAGGAGTCTACAAACAGATTTTGCATGAAGAGGTTGATTTTGCATCTAATCCGTGGCCAAGTATATCAGGAAGTGCTAAAGATTTGATAAAACAGATGTTGGATAAAGACCCTAAGAAAAGAATTTCTGCTCATGAAGTCTTGT…	ATGGCCCCAGAGGTGTTGTGCAAACAATCTGGACCAGAAGTGGACGTTTGGAGTGCTGGTGTTATTCTGTACATCTTACTGAGAGGGCTCCCACCTTTCTGGGCAAAATCCGAATCAGGAGTCTACAAACAGATTTTGCATGAAGAGGTTGATTTTGCATCTAATCCGTGGCCAAGTATATCAGGAAGTGCTAAAGATTTGATAAAACAGATGTTGGATAAAGACCCTAAGAAAAGAATTTCTGCTCATGAAGTCTTGTGTCACCCTTGGATTGTTGATGATAGTGTTGCCCCGGACAAACCTCTGGATCCTGCTGTTTTGACACGCCTAAAGCATTTCTCAACAATGAATAAACTGAAGAAGATGGCATTACGTGTCATAGTAGAAAGACTTTCAGAA…	MAPEVLCKQSGPEVDVWSAGVILYILLRGLPPFWAKSESGVYKQILHEEVDFASNPWPSISGSAKDLIKQMLDKDPKKRISAHEVLCHPWIVDDSVAPDKPLDPAVLTRLKHFSTMNKLKKMALRVIVERLSEEEIGGLKELFRMIDEDNSGTITFQELKDGLKSVGCDLMESEIKSLMEAADIDSNGTIDYGEFLAATLHLNKMEREENLVAAFSYFDRDGSGYITIDELQQACNDFGLGVLHLDEMIKEIDQDNDGRINYGEFTTMMRRGEPGRNRTMNSNVSTSLLHELGLKDSS	4	No	Yes	Pkinase (PF00069.28)-EF-hand_7 (PF13499.9)
PvCDPK6	AT2G17290 (AtCPK6)	Phvul.008G292500.1	PvChr8	forward	62964859	62973752	AAAGAATTTAGAATGGAGGGTGTAGTTAATAAGAAGAGGGATGCAAAAGGAAGGTGGTGAAATGGGCTTTGGTGCATTGAATTGGAGAAGGAAAGGAAAAAGAAAAAGAAAGCCGCGTGATATTTAATTGAAAAATGTTGAGAGAGAAGTGGGTGTAGCTGGTCAGCACTGACCTCCGATGTTTCTCGGCAAGAACCAATACAATCACATCCTAAAATTAACAAGAAAAGAAAAAATAGAAATATTTTTGAGAAACTAAATTTGTGGAGATCTGTGGGAACAGAAAGAAAGAAGCGAAAGGAAAGCGATTATCCTCTTTCCATTCGTTGACGTTCACCTTCTGCTTCTTTCTGGTACGCTCAATTCTTTATCTCTTATTTATTCGGTTTTCTGCTGTTA…	AAAGAATTTAGAATGGAGGGTGTAGTTAATAAGAAGAGGGATGCAAAAGGAAGGTGGTGAAATGGGCTTTGGTGCATTGAATTGGAGAAGGAAAGGAAAAAGAAAAAGAAAGCCGCGTGATATTTAATTGAAAAATGTTGAGAGAGAAGTGGGTGTAGCTGGTCAGCACTGACCTCCGATGTTTCTCGGCAAGAACCAATACAATCACATCCTAAAATTAACAAGAAAAGAAAAAATAGAAATATTTTTGAGAAACTAAATTTGTGGAGATCTGTGGGAACAGAAAGAAAGAAGCGAAAGGAAAGCGATTATCCTCTTTCCATTCGTTGACGTTCACCTTCTGCTTCTTTCTGTGCAGAGCACAGCACAGAACAGGGGAAAACGGGGAGGGGAAAGCTT…	ATGGGCAACACATGCCGCGGATCTTTGAAAGGGAAATATATTCAGGGCTTCAGCCAGCCCGAAGACCACTCCAAGCGCACCACCCTTTCTGATCGCCCCGACTCCGACCACCCCTCCTCAGCCAGACAAAATAATATCAATTCTTCAGAAAACAACACCAACAACATCGTTGTCAACAACAACAACAACAATAATCCACCCTTTGCCTCCAAGAAAGACTCCATCATGCGCCGCGGCCTTGACAACCAAGCTTACTATGTCTTGGGCCATAAGACTCCCAACATTCGTGATCTATACACTCTTGGCCGCAAATTGGGACAGGGGCAATTCGGCACCACTTATTTATGCACCGAGAATTCTACTTCCAATGAATATGCCTGCAAATCCATCTCCAAACGG…	MGNTCRGSLKGKYIQGFSQPEDHSKRTTLSDRPDSDHPSSARQNNINSSENNTNNIVVNNNNNNNPPFASKKDSIMRRGLDNQAYYVLGHKTPNIRDLYTLGRKLGQGQFGTTYLCTENSTSNEYACKSISKRKLISKEDVEDVRREIQIMHHLAGHRNIVTIKGAYEDPLYVHIVMELCSGGELFDRIIQRGHYTERKAAELTKIIVGVVEACHSLGVMHRDLKPENFLLVNKDDDFSLKAIDFGLSVFFKPGQVFTDVVGSPYYVAPEVLLKHYGPEADVWTAGVILYILLSGVPPFWAETQQGIFDAVLKGHIDFDSEPWPLISDSGKDLIRKMLCSQPSERLSAHQVLCHPWICENGVAPDRAIDPAVLSRLKQFSAMNKLKKMALRVIAESLSE…	4	No	Yes	Pkinase (PF00069.28)-EF-hand_7 (PF13499.9)
PvCDPK8	AT5G19450 (AtCPK8)	Phvul.007G253300.1	PvChr7	reverse	37518913	37524077	AGGACAAAAATGGAAATAGAAAGATTTTCCACGCCATTAAAGATAGAAATAGAGAGAAAAGAAGAACAAACGCAAAGAAAAAGAGGGTTAAGGAAGAAGAAGAAGAAGACAGAGGCGCTGGACCCTGCGTCCGCGTTTCATCCTTCGCTCTCTCCAAAAACCCTCATTTTTCCCATTCCTATTTTCTCATCTCTCTCTCATTTTCATTCCTTCATTCGTTCATTCGTTCATTGATTCTTTCATTCATTGATTCCTTCATTCATTATTCATTCGCATATTCTTCCAATTGATTCATCGTTGTTGCCGAGGGCTTCTGCATTGGAGATATGGGGAACAGTTGCGTCACTCCGGGGAGGATCAGGAAGGTGAGGAAGCAGAAGAAGCGGGAGGAGGGGGCGG…	AGGACAAAAATGGAAATAGAAAGATTTTCCACGCCATTAAAGATAGAAATAGAGAGAAAAGAAGAACAAACGCAAAGAAAAAGAGGGTTAAGGAAGAAGAAGAAGAAGACAGAGGCGCTGGACCCTGCGTCCGCGTTTCATCCTTCGCTCTCTCCAAAAACCCTCATTTTTCCCATTCCTATTTTCTCATCTCTCTCTCATTTTCATTCCTTCATTCGTTCATTCGTTCATTGATTCTTTCATTCATTGATTCCTTCATTCATTATTCATTCGCATATTCTTCCAATTGATTCATCGTTGTTGCCGAGGGCTTCTGCATTGGAGATATGGGGAACAGTTGCGTCACTCCGGGGAGGATCAGGAAGGTGAGGAAGCAGAAGAAGCGGGAGGAGGGGGCGG…	ATGGGGAACAGTTGCGTCACTCCGGGGAGGATCAGGAAGGTGAGGAAGCAGAAGAAGCGGGAGGAGGGGGCGGGAAAGAAGCTGGTGGTGCTCAAGGACCCCACGGGCCGGGACATTGGGCTGCGCTATGATTTGGGCCGGGAGCTGGGCCGAGGGGAGTTCGGCGTCACGTATCTCTGCCGCGACAGGGAGACGAAGGAGGAGTGGGCGTGCAAATCGATATCCAAGAAGAAACTGCGAACCGCCATTGATATTGAGGATGTGCGCAGGGAGGTGGAGATCATGCGCCATTTGCCCAAACACCCCAACATCGTCTCGCTCAAGGACACCTTCGAAGACGACAGCGCCGTTCACCTCGTCATGGAGCTCTGCGAGGGCGGCGAGCTCTTCGACCGCATT…	MGNSCVTPGRIRKVRKQKKREEGAGKKLVVLKDPTGRDIGLRYDLGRELGRGEFGVTYLCRDRETKEEWACKSISKKKLRTAIDIEDVRREVEIMRHLPKHPNIVSLKDTFEDDSAVHLVMELCEGGELFDRIVARGHYTERAAATVVKTIVEVVQMCHKHGVMHRDLKPENFLFGNKKESAPLKAIDFGLSVIFKPGEKFNEIVGSPYYMAPEVLKRNYGPEVDIWSAGVILYILLCGVPPFWAENEQGVAQAIIRSIVDFRREPWPKVSDNAKDLVRKMLNPDPKLRLTAEEVLDHPWLQNANKAPNVSLGETVRSRLMQFSVMNKLKKRALRVIADHLSSEEAAGIKEGFELMDSGNKGKINIDELRVGLRKLGHQIPDGDVQILMEAGDVDKDGY…	2	No	Yes	Pkinase (PF00069.28)-EF-hand_7 (PF13499.9)-EF-hand_8 (PF13833.9)
PvCDPK9	AT3G20410 (AtCPK9)	Phvul.008G266600.1	PvChr8	reverse	61203175	61207570	CTTCTATGGACTCACTCTTAGTCTTTAAACTTGTTTTGGTCGTAAAATAGTTTGAACCATTCTTGGTTTAAGACACATTAAATTCCATTTTTCCGCAGTTGACTTGGTTACAACTTTATCCTTTTTGTTCAGAGTTCAGACTCCTTCTACTTTCCTCTCCATCCTTAAAAAATTGCAGATTCTGATCTATTCTGCATCAGACTTTGGCTTCTTCTCTCTTTCTCCATACTTCAATGCATATCCTTCCTTGAATTCTCATCTGGGTTCATTCCTTTTTTTTCATGCTTTGAACCAATCACTTCTCAAGTTGTTGTTGTGTGGTAAAACTTGAAAATTTCATTCCTTTTTGCGTCACGGCCATGGGTGGTTGTCTGAGTAAAAATGGGTCAGAGTCAGAAG…	CTTCTATGGACTCACTCTTAGTCTTTAAACTTGTTTTGGTCGTAAAATAGTTTGAACCATTCTTGGTTTAAGACACATTAAATTCCATTTTTCCGCAGTTGACTTGGTTACAACTTTATCCTTTTTGTTCAGAGTTCAGACTCCTTCTACTTTCCTCTCCATCCTTAAAAAATTGCAGATTCTGATCTATTCTGCATCAGACTTTGGCTTCTTCTCTCTTTCTCCATACTTCAATGCATATCCTTCCTTGAATTCTCATCTGGGTTCATTCCTTTTTTTTCATGCTTTGAACCAATCACTTCTCAAGTTGTTGTTGTGTGGTAAAACTTGAAAATTTCATTCCTTTTTGCGTCACGGCCATGGGTGGTTGTCTGAGTAAAAATGGGTCAGAGTCAGAAG…	ATGGGTGGTTGTCTGAGTAAAAATGGGTCAGAGTCAGAAGAGCACAATGGTTACAGACATGTTGTTGGGGGAGCTCACAATCACAAGAGCCATGAACCCTTTGTCAACCAATTACCTGAGAAACATGCTCCTCAGGCTGCTTGGAGGCCCACTGTTCATTCTCCAAGCCCAAAACATGTTCACAGGGCTGACACCATCACTGGGAAGCCATTGGAGGATGTTAAGCAGCACTATACACTTGGGAAAGAATTGGGGAGAGGCCAATTTGGGGTGACTTATCTCTGCACTGAAAATTCAACTGGCTTGCAGTATGCCTGCAAGTCAATTTCAAAGAGGAAGCTTGTGAGAAGAGATGATAAGGAGGATATGAAGAGGGAGATTCAAATTATGCAGCATTTA…	MGGCLSKNGSESEEHNGYRHVVGGAHNHKSHEPFVNQLPEKHAPQAAWRPTVHSPSPKHVHRADTITGKPLEDVKQHYTLGKELGRGQFGVTYLCTENSTGLQYACKSISKRKLVRRDDKEDMKREIQIMQHLSGQPNIVEFKGSYEDKHSVHVVMELCAGGELFDRIIAKGHYSERAAASMCRQIVKVVNICHFMGVMHRDLKPENFLLSSKDDKGLLKATDFGLSVFIEEGKVYRDIVGSAYYVAPEVLHRSYGKEVDIWSAGVILYILLSGVPPFWAETERGIFDSILQGHIDFESSPWPSISSSAKDLVRKMLTKDPKKRITSAQVLEHPWLKEGGNASDKPIDSAVLSRMKQFRAMNKLKKLALKVIAENLSVEEIQGLKAMFTNMDTDHSGTI…	4	Yes	Yes	Pkinase (PF00069.28)-EF-hand_7 (PF13499.9)
PvCDPK10.1	AT1G18890 (AtCPK10)	Phvul.003G194100.1	PvChr3	reverse	41784590	41788241	AAGTAATTGAAGTAGGAATTGGAGAGGATTGATAAGTTAAGTTTGAAAAAGTAGGAAATGAATACTGAAAAGCAGTTTTAGGACAACCTGCGGCGTCTACAGTCAGTTTATCCATAATTGTAGGGAGGCACATATTTGTATGTAAAATGGTAAGGAATCCTTAAAACAACTAAGAGAATGATTTAATTTTGTCAAAACCAATAAATGCCATTTCACAGTCAAACAGCTTCCAAGTGAAATAAAACTCCACTTTTCTTCCAACTCACCATCATCCCCATCATCATCATCTATCCACCTTCTTCTCTGTTTCCGTCAGCCGGTGACATGGGGAACTGCAACGCGTGCGTGAGGGATGACGTGGCACACTCGAACCGCGTGAGGAAGAAGAACACGAAACCC…	AAGTAATTGAAGTAGGAATTGGAGAGGATTGATAAGTTAAGTTTGAAAAAGTAGGAAATGAATACTGAAAAGCAGTTTTAGGACAACCTGCGGCGTCTACAGTCAGTTTATCCATAATTGTAGGGAGGCACATATTTGTATGTAAAATGGTAAGGAATCCTTAAAACAACTAAGAGAATGATTTAATTTTGTCAAAACCAATAAATGCCATTTCACAGTCAAACAGCTTCCAAGTGAAATAAAACTCCACTTTTCTTCCAACTCACCATCATCCCCATCATCATCATCTATCCACCTTCTTCTCTGTTTCCGTCAGCCGGTGACATGGGGAACTGCAACGCGTGCGTGAGGGATGACGTGGCACACTCGAACCGCGTGAGGAAGAAGAACACGAAACCC…	ATGGGGAACTGCAACGCGTGCGTGAGGGATGACGTGGCACACTCGAACCGCGTGAGGAAGAAGAACACGAAACCCAACCCTTACGCGGAGGAGGCGCTCCGGTCGGGCGTTCCGATCCGCGTGCTGAAGGACGTGACGTCGCGGAGCCTCATCGGGGACAAGTACGTGATAGGTAGGGAGCTAGGTCGGGGTGAGTTCGGGATAACGTACCTGTGCACGGACCGGGAGACGAAGCAGGAGCTGGCCTGCAAGTCCATCTCCAAGCGCAAGCTCAGGACCGCCGTCGACGTCGAGGACGTGCGCCGCGAGGTGGCCATCATGTCCACGCTGCCGGACCACGCCAACGTCGTCAAGCTCAAAGCCACTTACGAGGACCATGAGAACGTTCACCTCGTCATG…	MGNCNACVRDDVAHSNRVRKKNTKPNPYAEEALRSGVPIRVLKDVTSRSLIGDKYVIGRELGRGEFGITYLCTDRETKQELACKSISKRKLRTAVDVEDVRREVAIMSTLPDHANVVKLKATYEDHENVHLVMELCAGGELFDRIVARGHYSERAAAHVARTIAEVVRMCHANGVMHRDLKPENFLFANKKENSVLKAIDFGLSVFFKPGERFSEIVGSPYYMAPEVLKRNYGPEVDVWSAGVILYILLCGVPPFWAEDERGVALAILRGVIDFKREPWPQISDSAKSLVRHMLEPDPKKRLTAEEVLEHPWLQNAKKASNVPLGDIVRTRLKQFSVMNRFKKRALRVIAEHLSVEEVEIIKDMFTLMDTDKDGKVTYEELKAGLRKVGSQLDEPEIKM…	4	No	Yes	Pkinase (PF00069.28)-EF-hand_7 (PF13499.9)
PvCDPK10.2	AT1G18890 (AtCPK10)	Phvul.009G190566.1	PvChr9	reverse	28940689	28945605	ATTTTTAATTCTCAATTTATTATTACTTAATTTCCAAAACCCACCATTTTCTTTTCCTTTTTTTCTCACTCAACTTTTCTCTCTCTCTCTTTCTTCTGCTTCTTCCCTTCGCCGGAAAATCCCGCCGGCGTTACTACTCAAGTAAACCTAGACTCTCTCACTCTTCTAGAAGCTTCTTCTACACAACACAGCATGGGAAACTGTAACGCGTGTGCGAAGGCTGATGTGGTGGAAGACAATAGCAAGTCGAGCGACGGCAACCGCGCCCGGAAAAAGGAGGCGAACCACAAAAAGCCGAACCCGTTTTCGGAGGAACCGGGGAGGTTGGCGGCGCCGATCCGTGTTCTGAAGGACGTGATTCCAATGAGCCACAGGACGCGCATAAGCGACACGTACATA…	ATTTTTAATTCTCAATTTATTATTACTTAATTTCCAAAACCCACCATTTTCTTTTCCTTTTTTTCTCACTCAACTTTTCTCTCTCTCTCTTTCTTCTGCTTCTTCCCTTCGCCGGAAAATCCCGCCGGCGTTACTACTCAAGTAAACCTAGACTCTCTCACTCTTCTAGAAGCTTCTTCTACACAACACAGCATGGGAAACTGTAACGCGTGTGCGAAGGCTGATGTGGTGGAAGACAATAGCAAGTCGAGCGACGGCAACCGCGCCCGGAAAAAGGAGGCGAACCACAAAAAGCCGAACCCGTTTTCGGAGGAACCGGGGAGGTTGGCGGCGCCGATCCGTGTTCTGAAGGACGTGATTCCAATGAGCCACAGGACGCGCATAAGCGACACGTACATA…	ATGGGAAACTGTAACGCGTGTGCGAAGGCTGATGTGGTGGAAGACAATAGCAAGTCGAGCGACGGCAACCGCGCCCGGAAAAAGGAGGCGAACCACAAAAAGCCGAACCCGTTTTCGGAGGAACCGGGGAGGTTGGCGGCGCCGATCCGTGTTCTGAAGGACGTGATTCCAATGAGCCACAGGACGCGCATAAGCGACACGTACATATTGGGCCGGGAATTGGGCCGGGGGGAGTTCGGCATCACCTACCTCTGCACGGACCGGGAAACCAAGGAGGCGCTGGCCTGCAAATCGATCTCGAAGCGGAAGCTGCGAACCGCCGTGGACATTGAGGACGTCCGGCGCGAGGTGGCTATCATGTCCACGCTTCCGGAGCATCCCAACATCGTGAGGCTCAAG…	MGNCNACAKADVVEDNSKSSDGNRARKKEANHKKPNPFSEEPGRLAAPIRVLKDVIPMSHRTRISDTYILGRELGRGEFGITYLCTDRETKEALACKSISKRKLRTAVDIEDVRREVAIMSTLPEHPNIVRLKATFEDNENVHLVMELCEGGELFDRIVARGHYSERAAAAVARTIAEVVKMCHSNGVMHRDLKPENFLFANKKENSALKAIDFGLSVFFKPGEKFAEIVGSPYYMAPEVLKRNYGPEVDVWSAGVILYILLCGVPPFWAETEQGVALAILRGVIDFKREPWPQISESAKSLVRRMLEPDPKKRLTAEQVLEHPWLQNAKKAPNVPLGDIVRSRLKQFSVMNRFKKRALRVIAEHLSVEEVEIIKDMFTLMDTDKDGRVTFEELKAGLR…	4	No	Yes	Pkinase (PF00069.28)-EF-hand_7 (PF13499.9)
PvCDPK11.1	AT1G35670 (AtCPK11)	Phvul.002G279300.1	PvChr2	forward	44866006	44871378	GGTTTATTTATTTGACAAGTTGGGCAGATGTCTGCGGATATAATTCTGGGAAGGCATCATCATATATTAATAATCTCACAAAACAAGACAAGTTGTTCCTCAATTCTTCAACCCATTCAATTCAAACTTCAAAGCAAAACACCCATTTTTATTACACAAACCTTCTTCTTCCCCTAATTTTCTTTCCATTTCCGCTCCTCAAATCAAATCACCATGCCCAAGAACACGCTCACACTTGTAACTCATACCCACCACCACCCCACCTGAAAAACACAACCTTTCCTTTCTGTTCCAAACTTAACACACTTGCATAACTGTTGACTACTTCAAAGGTTTGTTTTTTGGGTGACCCGACAGAGAACAATGGCGGCACAATCGACTTCGAGTTCGACAAACGTG…	GGTTTATTTATTTGACAAGTTGGGCAGATGTCTGCGGATATAATTCTGGGAAGGCATCATCATATATTAATAATCTCACAAAACAAGACAAGTTGTTCCTCAATTCTTCAACCCATTCAATTCAAACTTCAAAGCAAAACACCCATTTTTATTACACAAACCTTCTTCTTCCCCTAATTTTCTTTCCATTTCCGCTCCTCAAATCAAATCACCATGCCCAAGAACACGCTCACACTTGTAACTCATACCCACCACCACCCCACCTGAAAAACACAACCTTTCCTTTCTGTTCCAAACTTAACACACTTGCATAACTGTTGACTACTTCAAAGGTTTGTTTTTTGGGTGACCCGACAGAGAACAATGGCGGCACAATCGACTTCGAGTTCGACAAACGTG…	ATGGCGGCACAATCGACTTCGAGTTCGACAAACGTGACGGTGAAGGCGGCGTGGGTTCTGCCGCACCGGACGCAGAACCTCCGGGAGGTGTACGAGGTGGGTAGGAAGCTGGGACAGGGGCAGTTCGGGACGACGTTCCTGTGCACGCGCCGCGTGGGTAGGGGGCAGTTCGCGTGCAAGTCGATTCCGAAGCGGAAGCTTCTGTGCAAGGAGGACTACGAGGACGTATGGCGGGAGATTCAGATAATGCACCACTTGTCGGAGCACGCTCACGTGGTTCGCATCGAGGGCGTCTACGAGGACTCCTCCGCCGTGCACCTCGTCATGGAGCTCTGCGAGGGCGGCGAGCTCTTCGATCGGATCGTCCAGAAGGGCCACTACAGTGAGAGACAGGCGGCG…	MAAQSTSSSTNVTVKAAWVLPHRTQNLREVYEVGRKLGQGQFGTTFLCTRRVGRGQFACKSIPKRKLLCKEDYEDVWREIQIMHHLSEHAHVVRIEGVYEDSSAVHLVMELCEGGELFDRIVQKGHYSERQAARLIKTIFEVVEACHSLGVMHRDLKPENFLFDTVDEDAKLKATDFGLSVFYKPGESFSDVVGSPYYVAPEVLRKHYGPESDVWSAGVILYILLSGVPPFWAETEQGIFKQILLGTLDFQSEPWPSISDSAKDLIRKILDQNPKTRLTAHEVLRHPWIVDDSNAPDKPLDSAVLSRLKQFSAMNKLKKMALRVIAERLSEEEIGGLKELFKMIDTDNSGSITFDELKDGLKRVGSELMESEIKDLMDAADIDKSGTIDYGEFIAATVH…	4	No	Yes	Pkinase (PF00069.28)-EF-hand_7 (PF13499.9)
PvCDPK11.2	AT1G35670 (AtCPK11)	Phvul.009G160100.1	PvChr9	reverse	23666550	23672870	GAGAGGTTAAAGTTGGTGAGTTCTGACATAGAAAAAAAAGAGGAGCATTGAGTATCTTAAGTGGTAAGAGTTGAAGTGAGGGTCAGCAGAAAAACGCAGAAATTGTTTTTATTTATTTTCAATTTTTACCGGGTCTTCTTTTCTTCGTTGGTTTCTCTTTTGCTGACTCTGAGTCGGAGAGAGAGAGAGAGAGAGTGTTGGCAATGTCGAAGTCTCAACCGGGCAGTGGCGGAGGCGCACCGAAGGCTGCGTGGGTGCTGCCGTACCGCACGGAGAACGTGAGGGAGGTGTACACGCTGGGGCGGAAGCTGGGTCAGGGGCAATTTGGCACGACCTTCCTCTGCACGCACAACGCCACGGCTCGCACCTTTGCCTGCAAGTCAATCCCCAAGCGGAAGC…	GAGAGGTTAAAGTTGGTGAGTTCTGACATAGAAAAAAAAGAGGAGCATTGAGTATCTTAAGTGGTAAGAGTTGAAGTGAGGGTCAGCAGAAAAACGCAGAAATTGTTTTTATTTATTTTCAATTTTTACCGGGTCTTCTTTTCTTCGTTGGTTTCTCTTTTGCTGACTCTGAGTCGGAGAGAGAGAGAGAGAGAGTGTTGGCAATGTCGAAGTCTCAACCGGGCAGTGGCGGAGGCGCACCGAAGGCTGCGTGGGTGCTGCCGTACCGCACGGAGAACGTGAGGGAGGTGTACACGCTGGGGCGGAAGCTGGGTCAGGGGCAATTTGGCACGACCTTCCTCTGCACGCACAACGCCACGGCTCGCACCTTTGCCTGCAAGTCAATCCCCAAGCGGAAGC…	ATGTCGAAGTCTCAACCGGGCAGTGGCGGAGGCGCACCGAAGGCTGCGTGGGTGCTGCCGTACCGCACGGAGAACGTGAGGGAGGTGTACACGCTGGGGCGGAAGCTGGGTCAGGGGCAATTTGGCACGACCTTCCTCTGCACGCACAACGCCACGGCTCGCACCTTTGCCTGCAAGTCAATCCCCAAGCGGAAGCTTCTCTGCAAGGAGGACTACGATGACGTTTGGAGGGAGATTCAGATAATGCACCACCTCTCCGAACACCCCAACGTCGTCAGGATCCACGGCACCTACGAGGACACCTCCTCCGTCCACCTCGTCATGGAGCTCTGCGAGGGCGGCGAGCTCTTCGACAGGATCGTTCAGAAGGGCCACTACAGTGAGCGTCAGGCCGCCAAG…	MSKSQPGSGGGAPKAAWVLPYRTENVREVYTLGRKLGQGQFGTTFLCTHNATARTFACKSIPKRKLLCKEDYDDVWREIQIMHHLSEHPNVVRIHGTYEDTSSVHLVMELCEGGELFDRIVQKGHYSERQAAKLIKTIVEVVEACHSLGVMHRDLKPENFLFDTVEEDAKLKTTDFGLSVFYKPGETFCDVVGSPYYVAPEVLRKHYGPESDVWSAGVILYILLSGVPPFWAETEQGIFRQILLGRLDFQSEPWPSISDSAKDLIRKMLDRNPKTRLTAHKVLCHPWIIDDNLAPDKPLDSAVLSRLKQFSAMNKLKKMALRVIAERLSEEEIGGLKELFKMIDADNSGTITFDELKEGLKRVGSDLMESEIKDLMDAADIDNSGTLDYGEFIAATVHL…	4	No	Yes	Pkinase (PF00069.28)-EF-hand_7 (PF13499.9)
PvCDPK13	AT3G51850 (AtCPK13)	Phvul.008G098400.1	PvChr8	forward	10295962	10304546	TTGAAAACGAAAAAAGAGGAATTAATTAATTTATATATGAAATGGCGAAAACCCGAGGTTCTTGGCTCCTAAAAAACCGCATCCCCAGCCGTTACCGTACACCATCACACACCCTCCTTCCACTCACTCGCTACTCACTCACACTCATTCTCACTCTCCTACTCTTCTGCTGCTGCTGCTTCTTCTTCATCTTCTTCTTCACCTTCGTTTCAATCACACCTTCTTTTTCGAAATCACATTCTAGGGTTAGGGTTTCCGCATTATGATGTGAAAGGCTAGCACGCCTCGTCGACCATCTCCTCCCAAACCCTCCCCTCCGCCGCGATCTCCGCTTCTCCTACCATGGGAAACTGCTGCAGATCCCCGGCCGCCGTGGCCCGCGAGGACGTCAAATCGAGC…	TTGAAAACGAAAAAAGAGGAATTAATTAATTTATATATGAAATGGCGAAAACCCGAGGTTCTTGGCTCCTAAAAAACCGCATCCCCAGCCGTTACCGTACACCATCACACACCCTCCTTCCACTCACTCGCTACTCACTCACACTCATTCTCACTCTCCTACTCTTCTGCTGCTGCTGCTTCTTCTTCATCTTCTTCTTCACCTTCGTTTCAATCACACCTTCTTTTTCGAAATCACATTCTAGGGTTAGGGTTTCCGCATTATGATGTGAAAGGCTAGCACGCCTCGTCGACCATCTCCTCCCAAACCCTCCCCTCCGCCGCGATCTCCGCTTCTCCTACCATGGGAAACTGCTGCAGATCCCCGGCCGCCGTGGCCCGCGAGGACGTCAAATCGAGC…	ATGGGAAACTGCTGCAGATCCCCGGCCGCCGTGGCCCGCGAGGACGTCAAATCGAGCTTCTCCAACGCAGACCACCATGGCAAGCGTGGTTCCGGCGCTGAAGCTGTCAAACAGAAGGCGCCGATCACGGTACTCGCCGGTGTGCCCAAGGAGAACATCGAGGACCGCTACCTCGTCGACCGCGAGCTCGGCCGCGGGGAGTTCGGCGTGACTTACCTCTGCATCGACCGCGACACGCGCGAGCTGCTCGCGTGCAAAAGCATATCCAAGAGGAAGCTCAGGACTGCCGTCGACGTCGAGGACGTCCGCCGCGAGGTAGCCATCATGCGACACCTGCCTGAGAGCCCCAGCATCGTGTCACTCCGCGAAGCCTGTGAGGACGACAATGCGGTTCACCTC…	MGNCCRSPAAVAREDVKSSFSNADHHGKRGSGAEAVKQKAPITVLAGVPKENIEDRYLVDRELGRGEFGVTYLCIDRDTRELLACKSISKRKLRTAVDVEDVRREVAIMRHLPESPSIVSLREACEDDNAVHLVMELCEGGELFDRIVARGHYTERAAAAVTRTIVEVVQLCHKHGVIHRDLKPENFLFANKKENSPLKAIDFGLSIFFKPGERFSEIVGSPYYMAPEVLKRNYGPEIDIWSAGVILYILLCGVPPFWAESEQGVAQAILRGLIDFKREPWPSISEGAKSLVRQMLEPDPKLRLTAKQVLEHPWLQNAKKAPNVPLGDVVKSRLKQFSMMNRFKRKALRVIADFLSNEEVEDIKDMFKKMDNDNDGIVSIEELKAGFRNFGSQLAESEI…	3	No	Yes	Pkinase (PF00069.28)-EF-hand_7 (PF13499.9)
PvCDPK16	AT2G17890 (AtCPK16)	Phvul.002G108700.1	PvChr2	reverse	23210281	23216106	CTCTTTCTCTCACACACACAATCATCCACACTACACATAAACCTCTCAATTCTCTCTCTCTCTCTCTGTGTATATCTCTCTATGCTAATAAACCAATGAATGGTAACATTTTCTCATTTTTCCTCTGATCTCTCTGTTATTTTTCCATCATGGGCATCTGTTTCTCCGCCACCAAAGTCAGCGGCTCCAACAGCAACAACGCCGGCGCCTCAAATCGAAACCGAAAATGGTCGGCTCCGATGACGGCGCAGGTGACGTTGCAGCCCCTGACGGCGCAAAAGCAACAGTCGTCGCACAAGCAACAGTCATCGCACAAGCAACAGTCGTCGCATGGTCAACGACGGCGCGTACCAGAGGATTCGAGGAAGAACCCACGCGCCAAGGAGAAAACGAGCGGGC…	CTCTTTCTCTCACACACACAATCATCCACACTACACATAAACCTCTCAATTCTCTCTCTCTCTCTCTGTGTATATCTCTCTATGCTAATAAACCAATGAATGGTAACATTTTCTCATTTTTCCTCTGATCTCTCTGTTATTTTTCCATCATGGGCATCTGTTTCTCCGCCACCAAAGTCAGCGGCTCCAACAGCAACAACGCCGGCGCCTCAAATCGAAACCGAAAATGGTCGGCTCCGATGACGGCGCAGGTGACGTTGCAGCCCCTGACGGCGCAAAAGCAACAGTCGTCGCACAAGCAACAGTCATCGCACAAGCAACAGTCGTCGCATGGTCAACGACGGCGCGTACCAGAGGATTCGAGGAAGAACCCACGCGCCAAGGAGAAAACGAGCGGGC…	ATGGGCATCTGTTTCTCCGCCACCAAAGTCAGCGGCTCCAACAGCAACAACGCCGGCGCCTCAAATCGAAACCGAAAATGGTCGGCTCCGATGACGGCGCAGGTGACGTTGCAGCCCCTGACGGCGCAAAAGCAACAGTCGTCGCACAAGCAACAGTCATCGCACAAGCAACAGTCGTCGCATGGTCAACGACGGCGCGTACCAGAGGATTCGAGGAAGAACCCACGCGCCAAGGAGAAAACGAGCGGGCGTCGCCAAGGGGGCAACCTCCCCTGCGGAAAACGAACGGATTTTGGGTACGAGAAAGACTTCGACAAGAAATTCTCGCTCGGGAAGTTGTTGGGACACGGCCAATTCGGTTACACCTACGTTGGGATAGACAAAGCAAATGGGGATCGC…	MGICFSATKVSGSNSNNAGASNRNRKWSAPMTAQVTLQPLTAQKQQSSHKQQSSHKQQSSHGQRRRVPEDSRKNPRAKEKTSGRRQGGNLPCGKRTDFGYEKDFDKKFSLGKLLGHGQFGYTYVGIDKANGDRVAVKRLEKNKMVLPIAVEDVKREVKILKELTGHENVVQFYNAFEDDSYVYIVMELCEGGELLDRILAKKDSRYTEKDAAVVVRQMLKVAAECHLHGLVHRDMKPENFLFKSTREDSPLKATDFGLSDFIKPGKRFPDIVGSAYYVAPEVLKRKSGPESDVWSIGVITYILLCGRRPFWDKTEDGIFKEVLRNKPDFRRKPWPTISNSAKDFVKKLLVKDPRARYTAAQALSHPWVKEGGEALEIPIDISVLNNMRQFVRYSRLKQF…	4	Yes	Yes	Pkinase (PF00069.28)-EF-hand_7 (PF13499.9)
PvCDPK17.1	AT5G12180 (AtCPK17)	Phvul.006G015300.1	PvChr6	forward	7024909	7028768	TTCCCATTCCTCCTTATATATCTCTCTCTCTCACACACACCTTCTCTCTCTCTCTCTCCTTCAAAACTTTTCCCAACTCTTTTGGTTTTGCTCCCTCCATTCCTCTCCATGGGCAACTGTTGCTCTCAAGGCAACGCTGCCGATGGCCCGGCTGACAACACCGCGGCAGATGACAAGGGAGAAACCAACCAACAAACTAATAATCATTCAAACAACAATAATAATAATGAAGATAATTCTGCCACAAACCCTACCACCCCACCGGCATCCTCACCACCACCTACAGTCACACCACCTCCTTCAAAATCCATAAAACCGTCCGCCATGGGCCCTGTCCTACAGCGGCCCATGGAGGATGTGAGAGCAGCCTACACCATTGGGAAGGAGCTAGGGAGAGGC…	TTCCCATTCCTCCTTATATATCTCTCTCTCTCACACACACCTTCTCTCTCTCTCTCTCCTTCAAAACTTTTCCCAACTCTTTTGGTTTTGCTCCCTCCATTCCTCTCCATGGGCAACTGTTGCTCTCAAGGCAACGCTGCCGATGGCCCGGCTGACAACACCGCGGCAGATGACAAGGGAGAAACCAACCAACAAACTAATAATCATTCAAACAACAATAATAATAATGAAGATAATTCTGCCACAAACCCTACCACCCCACCGGCATCCTCACCACCACCTACAGTCACACCACCTCCTTCAAAATCCATAAAACCGTCCGCCATGGGCCCTGTCCTACAGCGGCCCATGGAGGATGTGAGAGCAGCCTACACCATTGGGAAGGAGCTAGGGAGAGGC…	ATGGGCAACTGTTGCTCTCAAGGCAACGCTGCCGATGGCCCGGCTGACAACACCGCGGCAGATGACAAGGGAGAAACCAACCAACAAACTAATAATCATTCAAACAACAATAATAATAATGAAGATAATTCTGCCACAAACCCTACCACCCCACCGGCATCCTCACCACCACCTACAGTCACACCACCTCCTTCAAAATCCATAAAACCGTCCGCCATGGGCCCTGTCCTACAGCGGCCCATGGAGGATGTGAGAGCAGCCTACACCATTGGGAAGGAGCTAGGGAGAGGCCAATTTGGTGTCACACATTTGTGCACAGACAAAACAACTGGTGAACAATTTGCATGCAAAACCATTGCCAAGAGGAAGCTTGTGAGTAAAGAGGATATAGAGGATGTG…	MGNCCSQGNAADGPADNTAADDKGETNQQTNNHSNNNNNNEDNSATNPTTPPASSPPPTVTPPPSKSIKPSAMGPVLQRPMEDVRAAYTIGKELGRGQFGVTHLCTDKTTGEQFACKTIAKRKLVSKEDIEDVRREVEIMLHLSQQPNIVELKGAYEDKQSVHLVMELCAGGELFDRIIAKGHYTERAAASLLRTIVQIVHTFHSMGVIHRDLKPENFLLLNKDENAPLKATDFGLSVFFKEGETFKDIVGSAYYIAPEVLKRKYGPEVDIWSVGVMLYILLSGVPPFWAESEHGIFNAILRGHIDFTSDPWPSISPSAKDLVSNMLNSDPAERLTAAQVLNHPWIKEDGEAPDKPLDNAVLNRLKQFRAMNQFKKVALRVIAGCLSEEEIMGLKEMFK…	4	Yes	Yes	Pkinase (PF00069.28)-EF-hand_7 (PF13499.9)
PvCDPK17.2	AT5G12180 (AtCPK17)	Phvul.008G201900.1	PvChr8	forward	54865627	54868891	CTTTCCCAACAAACAGACACTTCCCCTCATGCTAACACCTTCTCTCCAGAAAACAATCACAACATTATTTTTGAGCCCTCAAATCACACCACCTTGACCTATATCTACAAGTCATTTCCTTTCATTTCCCTCCACCCCTTTTGTTCCTGTTCTCCCTTCCATTCCACCATGGGCAACTGTTGCTCAGGTGGCACCAATGATTGTGACAACAAGGGAGAAACCAACCAAAACAACAACAATGATGAAGGGGGAACTGCAACCACCCCACCACAATCTAAGCCTAACCATCCTCCATCCAAGCAATCCAAGCCGGCCGCCATCGGCCCTGTGCTTGGAAAGCCAATGGAGGATGTGAGAAGTACTTACAGCATGGGGAAAGAGCTAGGGAGAGGCCAGTTT…	CTTTCCCAACAAACAGACACTTCCCCTCATGCTAACACCTTCTCTCCAGAAAACAATCACAACATTATTTTTGAGCCCTCAAATCACACCACCTTGACCTATATCTACAAGTCATTTCCTTTCATTTCCCTCCACCCCTTTTGTTCCTGTTCTCCCTTCCATTCCACCATGGGCAACTGTTGCTCAGGTGGCACCAATGATTGTGACAACAAGGGAGAAACCAACCAAAACAACAACAATGATGAAGGGGGAACTGCAACCACCCCACCACAATCTAAGCCTAACCATCCTCCATCCAAGCAATCCAAGCCGGCCGCCATCGGCCCTGTGCTTGGAAAGCCAATGGAGGATGTGAGAAGTACTTACAGCATGGGGAAAGAGCTAGGGAGAGGCCAGTTT…	ATGGGCAACTGTTGCTCAGGTGGCACCAATGATTGTGACAACAAGGGAGAAACCAACCAAAACAACAACAATGATGAAGGGGGAACTGCAACCACCCCACCACAATCTAAGCCTAACCATCCTCCATCCAAGCAATCCAAGCCGGCCGCCATCGGCCCTGTGCTTGGAAAGCCAATGGAGGATGTGAGAAGTACTTACAGCATGGGGAAAGAGCTAGGGAGAGGCCAGTTTGGTGTCACACATCTGTGCACACACAAGAGCACAGGAAAGCAATATGCATGCAAAACCATTGCCAAGAGAAAGCTGGTTAACAAGGAGGACATAGAGGATGTGAAGAGGGAGGTGCAAATCATGCACCATCTCTCAGGGCAGCCCAACATTGTGGAGCTTGTCAATGTG…	MGNCCSGGTNDCDNKGETNQNNNNDEGGTATTPPQSKPNHPPSKQSKPAAIGPVLGKPMEDVRSTYSMGKELGRGQFGVTHLCTHKSTGKQYACKTIAKRKLVNKEDIEDVKREVQIMHHLSGQPNIVELVNVFEDKQSVHLVMELCAGGELFDRIIAKGHYTERAAASLLRTIVQIVHTCHSMGVIHRDLKPENFLLLNKDENAPLKATDFGLSVFYKQGEMFKDLVGSAYYIAPEVLKRKYGPEVDIWSIGVMLYILLSGVPPFWAETENGIFHAILRAHIDFTSDPWPSISPAAKDLVRKMLNADPRQRLTAYEVLNHPWIKEDGEAPDTPLDNAVLNRLKQFRAMNEFKKVALRVIAGCLSEEEIMGLKQMFKGMDTDNSGTITIEELKQGLAKQ…	4	Yes	Yes	Pkinase (PF00069.28)-EF-hand_7 (PF13499.9)
PvCDPK20	AT2G38910 (AtCPK20)	Phvul.007G265100.1	PvChr7	reverse	38623002	38629456	CATGCATGCGATCTGGTTTTTCTCTTCGTTCTCACCAAGTTTCTGAATTCGACAATAACATCACAATCTCACGCCATTTTCATTCGCCAAATTAACCTCACCATTTGCATTCCACACATTCCATCCACGCCAATCTCGAATCTGGAATTCCCAAATTTCGAAATCTTCAACCTCGAGGATCGTTTTCCGTGGGAGATAGAGATCTTGGAGTTTGAAAAGAGCACAAATTAGGGTTTCGATTTCGCTTGGAGATAGATCTCGGAGTTTCGATACAGAACGCTATGGTTTCCTCGAGATTGCAACATTGGTGATGGCGTCGTCGCGGCGAGAGTGGAATCTCGCGCGTTGGTGAAAAGACTTGCAACGATGGGCAACAACTGCGTGGGACCGAACGTCGGT…	CATGCATGCGATCTGGTTTTTCTCTTCGTTCTCACCAAGTTTCTGAATTCGACAATAACATCACAATCTCACGCCATTTTCATTCGCCAAATTAACCTCACCATTTGCATTCCACACATTCCATCCACGCCAATCTCGAATCTGGAATTCCCAAATTTCGAAATCTTCAACCTCGAGGATCGTTTTCCGTGGGAGATAGAGATCTTGGAGTTTGAAAAGAGCACAAATTAGGGTTTCGATTTCGCTTGGAGATAGATCTCGGAGTTTCGATACAGAACGCTATGGTTTCCTCGAGATTGCAACATTGGTGATGGCGTCGTCGCGGCGAGAGTGGAATCTCGCGCGTTGGTGAAAAGACTTGCAACGATGGGCAACAACTGCGTGGGACCGAACGTCGGT…	ATGGGCAACAACTGCGTGGGACCGAACGTCGGTAACGGCTTCATCCAGTCCGTTACGGCGGCGGTGTGGAAGACGCGCCCGCCGGAGTCCCGCCTTCCGCCGCCTTCCGATGAGACCAAAACCTCGACTCCGGTACCGAAATCCGAGAAAGAGGCGGAACCCGCGCCTTCCCAATCCTCGGATCCTCCGTTGCGGGTGCAGAACACGCCGCCGGAGCAGGTGAAAATGCCCGCCTCGGCAGAGGCGAAGCCGCTCCCGCTGGACCACGAGAAGCCGGCGTCGAGCCATACCGAGCCGGCTGCCGGCGACAAGGAGAAGAAACCCACTCACGTGAAACGGATGTCCAGTATGGGACTTCAAGTGGACTCGGTGCTGGGTCGAAAAACAGAGAACATGAAG…	MGNNCVGPNVGNGFIQSVTAAVWKTRPPESRLPPPSDETKTSTPVPKSEKEAEPAPSQSSDPPLRVQNTPPEQVKMPASAEAKPLPLDHEKPASSHTEPAAGDKEKKPTHVKRMSSMGLQVDSVLGRKTENMKEFFSLGRKLGQGQFGTTFLCVQKGTNKDFACKSIAKRKLTTQEDVEDVRREIQIMHHLAGHPNVIQIVGAYEDAVAVHVVMQLCAGGELFDRIIQRGHYTEKKAADLARLIVSVVEACHSLGVMHRDLKPENFLFVNQEEESPLKTIDFGLSVFFRPGETFTDVVGSPYYVAPEVLRKNYGPECDVWSAGVIIYILLSGVPPFWDETEQGIFEQVLKGELDFVSEPWPSISESAKDLVRRMLVRDPKKRLTAHEVLCHPWVQVGGV…	4	No	Yes	Pkinase (PF00069.28)-EF-hand_7 (PF13499.9)
PvCDPK21	AT4G04720 (AtCPK21)	Phvul.003G078400.1	PvChr3	forward	12570425	12575047	AAATATTCAATGTTTTTTACAGCGAGTGTTGACAGTGTCACCATCGCTTTGGACTTTGGACACTAGCTGCCTTTTATCCCTCTTTTCTACTTTCTGCCCACATCACTGCAAACTATCTCCTTCCATCTCCGAATCTTCTCCCAAATCCTTCAAAAGAGAAAATGGGTTGTCACGGCAGCAAGGAGAAAAAATCAAACGCAGAATTCAGCAGTGCCTATGGATCAGGCAGTGCTGGTCACAATACTGTTCAACAACCATCTACCACCACTGTTGCACAGGTTCAAACATCACCACCACCCAAACCACAACCACATTCAGAGGCGGTAGCGAGTCCACCAAAACCGAAACTTTCTCCGACCCAGAATGCCAGGGCGGTGCAGAAACCCGACGCCACGATTC…	AAATATTCAATGTTTTTTACAGCGAGTGTTGACAGTGTCACCATCGCTTTGGACTTTGGACACTAGCTGCCTTTTATCCCTCTTTTCTACTTTCTGCCCACATCACTGCAAACTATCTCCTTCCATCTCCGAATCTTCTCCCAAATCCTTCAAAAGAGAAAATGGGTTGTCACGGCAGCAAGGAGAAAAAATCAAACGCAGAATTCAGCAGTGCCTATGGATCAGGCAGTGCTGGTCACAATACTGTTCAACAACCATCTACCACCACTGTTGCACAGGTTCAAACATCACCACCACCCAAACCACAACCACATTCAGAGGCGGTAGCGAGTCCACCAAAACCGAAACTTTCTCCGACCCAGAATGCCAGGGCGGTGCAGAAACCCGACGCCACGATTC…	ATGGGTTGTCACGGCAGCAAGGAGAAAAAATCAAACGCAGAATTCAGCAGTGCCTATGGATCAGGCAGTGCTGGTCACAATACTGTTCAACAACCATCTACCACCACTGTTGCACAGGTTCAAACATCACCACCACCCAAACCACAACCACATTCAGAGGCGGTAGCGAGTCCACCAAAACCGAAACTTTCTCCGACCCAGAATGCCAGGGCGGTGCAGAAACCCGACGCCACGATTCTGGGGAAACCCTTTGAGGATATAAAGAAGTACTACAGTCTGGGGAAGGAACTGGGAAGAGGGCAATTCGGTATAACGTATCTGTGCACGGAGAATGCGACCGGAATGACTTACGCTTGCAAGTCGATTCTGAAGAGGAAGCTGGTGTCGAGAGCGGACAGG…	MGCHGSKEKKSNAEFSSAYGSGSAGHNTVQQPSTTTVAQVQTSPPPKPQPHSEAVASPPKPKLSPTQNARAVQKPDATILGKPFEDIKKYYSLGKELGRGQFGITYLCTENATGMTYACKSILKRKLVSRADREDMKREIQIMQHLSGQNNIVEFKGAFEDRMSVHLVMELCAGGELFDRIIAQGHYSERAAASLCRAMVNVVNICHFMGVLHRDLKPENFLLSTKDDDATLKATDFGLSVFIEEGKVYHDMVGSAYYVAPEVLRRSYGKEIDIWSAGVILYILLSGVPPFWAETEKGIFNAILEGELDFVSEPWPSISDSAKDLVRKMLTQDPKKRITSAQVLEHPWMREGGEASDKPIDSAVLSRMKQFRAMNKLKKLALKVIAENLSEEEIKGLKA…	4	Yes	Yes	Pkinase (PF00069.28)-EF-hand_7 (PF13499.9)
PvCDPK24	AT2G31500 (AtCPK24)	Phvul.011G055400.1	PvChr11	forward	4877733	4881802	AGGATTCCCAATCTCCTAGGTTCCTCTTGTCTTCCCATGGAGATTGGGTAACATAACGTAACTCAATTCATCACAACCCCTTTGGATTATCATACATTACTGTAATACATATTCATATATATATACAGCAAAACACCAACGTAATATTGCTATTTCTTTTTATCATTCCTATTATATAATCCAAAACCGAACATTGTTCGCAACAACGTTTATTTTTTCTTAATTTTTAGAACATCGTTGTTCGTGTTATTGAAACCTATCATCCATGGGAAGTTGCATTTCAACGCAAGGCGTGAGGACACGCAAGAGGGTAAAGCACACAAGCAAGCCCTCGTCCCCGCGAGGGCAAGGGCATGGCCACGAGCAGACGCGGAGGTCCAGCGTGGTGGCTCCTAGGTC…	AGGATTCCCAATCTCCTAGGTTCCTCTTGTCTTCCCATGGAGATTGGGTAACATAACGTAACTCAATTCATCACAACCCCTTTGGATTATCATACATTACTGTAATACATATTCATATATATATACAGCAAAACACCAACGTAATATTGCTATTTCTTTTTATCATTCCTATTATATAATCCAAAACCGAACATTGTTCGCAACAACGTTTATTTTTTCTTAATTTTTAGAACATCGTTGTTCGTGTTATTGAAACCTATCATCCATGGGAAGTTGCATTTCAACGCAAGGCGTGAGGACACGCAAGAGGGTAAAGCACACAAGCAAGCCCTCGTCCCCGCGAGGGCAAGGGCATGGCCACGAGCAGACGCGGAGGTCCAGCGTGGTGGCTCCTAGGTC…	ATGGGAAGTTGCATTTCAACGCAAGGCGTGAGGACACGCAAGAGGGTAAAGCACACAAGCAAGCCCTCGTCCCCGCGAGGGCAAGGGCATGGCCACGAGCAGACGCGGAGGTCCAGCGTGGTGGCTCCTAGGTCCAGTGTGACGGCGCGTCCGCTGAACGTGGTGGCCAACCCGAGTCCGGGGAACATATTCGACAAGTACCAGTTCGGGAAGGAGCTGGGGCGCGGCGAGTTCGGCGTGACTCACCGTGTGGTGGATTTGGTGAGTGGCGAAGCGTTTGCGTGCAAGAAGATTGCGAAGACGAAGCTGAGGACGGAGATTGACGTGGAGGATGTGAAGAGAGAGGTGCAGATCATGAGGCACTTGCCGAGGCACCCCAACATTGTGGCCTTCAAGGAG…	MGSCISTQGVRTRKRVKHTSKPSSPRGQGHGHEQTRRSSVVAPRSSVTARPLNVVANPSPGNIFDKYQFGKELGRGEFGVTHRVVDLVSGEAFACKKIAKTKLRTEIDVEDVKREVQIMRHLPRHPNIVAFKEAYEDRDAVYLVMELCEGGELFDRIVAKGHYTERAAANVAKTILEVCKVCHAHGVIHRDLKPENFLFADASETAALKSIDFGLSTFYVPGEKFSEIVGSPYYMAPEVLRRNYGQEIDVWSTGVILYILLCGVPPFWAESEEGIAQSIIKGKVDFTRDPWPKVSDEAKHLVKRMLDPSPFTRITVQEVLDNTWIQNREHGRTISLGDQVRMRIKQFSLMNRFKRKVLRVVADNLSDEQLAMFKKMFDMMDKDKNGNLSFEELKDGLSM…	4	Yes	Yes	Pkinase (PF00069.28)-EF-hand_7 (PF13499.9)-EF-hand_8 (PF13833.9)
PvCDPK28	AT5G66210 (AtCPK28)	Phvul.003G261700.1	PvChr3	reverse	50115856	50126462	AGTTGATTGGGGAAGGGGTGTCATCCCGACCCCGTCCCGTTATCGCTCTAATCCAAAGGTTTTCTTCCGTTATTCCTTTGCATCACAGTTCACACCCCTTTGTCTTTCTTCCCCAAAGGGATCACAAATGCAACTACTTTAATTGCTGTTATTGTAGATAGATATTCTAACTTTTTTTCCAAGCTCCTCGTGATTTCTATCTTTTAAGCGTGTTCGACCCTCTCCGACCATGGGAATTTGCTATTCCGCCACCAAGGTCAGCGTCTTCAACGGCTCCCCCGTCACCGTCAAGAAAAACCGCAAGCGCGCCGCGGCACCCGAAAAGAGGACGCCGACGGCCAATACCGAACGGCACAAGGCAAGTTCGCGGCACGTGCCGTGCGGGAAACGCACGGATTT…	AGTTGATTGGGGAAGGGGTGTCATCCCGACCCCGTCCCGTTATCGCTCTAATCCAAAGGTTTTCTTCCGTTATTCCTTTGCATCACAGTTCACACCCCTTTGTCTTTCTTCCCCAAAGGGATCACAAATGCAACTACTTTAATTGCTGTTATTGTAGATAGATATTCTAACTTTTTTTCCAAGCTCCTCGTGATTTCTATCTTTTAAGCGTGTTCGACCCTCTCCGACCATGGGAATTTGCTATTCCGCCACCAAGGTCAGCGTCTTCAACGGCTCCCCCGTCACCGTCAAGAAAAACCGCAAGCGCGCCGCGGCACCCGAAAAGAGGACGCCGACGGCCAATACCGAACGGCACAAGGCAAGTTCGCGGCACGTGCCGTGCGGGAAACGCACGGATTT…	ATGGGAATTTGCTATTCCGCCACCAAGGTCAGCGTCTTCAACGGCTCCCCCGTCACCGTCAAGAAAAACCGCAAGCGCGCCGCGGCACCCGAAAAGAGGACGCCGACGGCCAATACCGAACGGCACAAGGCAAGTTCGCGGCACGTGCCGTGCGGGAAACGCACGGATTTTGGTTACGAGAAGCATTTCGATACGCGGTACACGCTGGGCAAATTGCTGGGACACGGCCAATTCGGTTACACCTACGTAGGAATCGACAAAGCTAATGGCGATCGCGTCGCCGTTAAGAGGCTCGAGAAGAGTAAGATGGTTCAGCCTATTGCCGTTGAGGATGTTAAGCGAGAGGTCAAGATATTGAAAGCGCTCACTGGCCACGAGAATGTGGTTCAGTTCTATGAT…	MGICYSATKVSVFNGSPVTVKKNRKRAAAPEKRTPTANTERHKASSRHVPCGKRTDFGYEKHFDTRYTLGKLLGHGQFGYTYVGIDKANGDRVAVKRLEKSKMVQPIAVEDVKREVKILKALTGHENVVQFYDAFEDDSYVYIVMELCEGGELLDRILAKKESRYTEKDAAVVVRQMLKVAAECHLHGLVHRDMKPENFLLKSTKEDSPLKATDFGLSDFIKPGKKFHDIVGSAYYVAPEVLKRKSGPQSDVWSIGVITYILLSGRRPFWDKTEDGIFKEVLRKKPDFHRKPWTTISNAAIDFVKKLLVKDPRARLTAAQALSHPWVREGGEASEIPIDISVLSNMRQFVKYSRLKQFALRALASTLNEEELADLKDQFDAIDVDKNGSISLEEMRQAL…	4	No	Yes	Pkinase (PF00069.28)-EF-hand_7 (PF13499.9)
PvCDPK29.1	AT1G76040 (AtCPK29)	Phvul.001G002800.2	PvChr1	forward	165997	170716	AAAGTAAAAAAAACTATCACCAGGTAAAGATCAAGATCGAAAGAAGCTCTGATAAGAAAAAAAATGGGGTTGGGGTTGTTTAAGGCGTTGTTTTGCTGCAACAAGGCCCGTGAAATAGAAATCATGGAGTCATGGGAGTCCTCTCCGGAGAATAGCTCGAGAGAAGATAGTGGAAAAAGGAAAGCAGTTGCAGGTGGTGGTGAGAAAAAGAGTAGCAAGGCACAGACGGGAGCTATTCTGGGAAAACCTTACGTGAAGATAGAGCAAATTTACGAGATGAAGAAAGAGCTGGGAAGTGGGCAATGGGGTGTGACTTATCTGTGCGTGGAGAAGACGACGCAGAGAGAGTACGCATGCAAGTCCATTGCGAAGTCGAAGCTTTTGAGTGCGCAGGAGATT…	CTTTGGTTTGGTATTGGATGTGGGGCCGGAGAGGAGAGAAATTCCACTAGACACGTAACTAACAAAACCTAACAGCAGCATATATAACATCAAAACACACAAACTAACATGAAACAGAGCATAGTGAGGGTGTTAAACAACATAAAATCTCTCTCTCTGTGTCACTGTCTCTCTCTAACAAAGCGTACTGCGTACTGATGCAAAAAAGTGAGGAATGGTGCTTTATGTTGTGTGAGTGAGAAGAGAGGACCATCTCATCTCATCCCAAATCCCATATCACATATCCAATATCCCAACCCCAAACCAAAAGCAAAGAATAAATCAAGAGTGGCAACACAGTTTGTGTTTTGTGTTTTTCTTTTCTTTTCCACATCTAAACTCAGAACCTGAAAATCTCAC…	ATGGGCTTCTGCTTCAGCAAACCCCGCAGCAACGAAATAACAATCAACTATGATTCACCACCCCCTCATCGTTTTCACCCTCGTCCACGCCCTCCAACAACCCAACAACCTCGTTTTCAACCTCGTTATGCAAGCTCAGACCCTTCACTTTCCATCGCCCCTTCATCATCATTCAGTGATCCCTCACGAATTCTAGAGAAACCATACTTTGACATTAAAGCGCTTTACACGCTGGAGAGGGAGCTGGGGAGGGGTCAATTCGGGATCACTCGTCTCTGTACCGAGAAGACCACTGGAAGGAAATACGCCTGCAAGTCCATTTCAAAGCGGAGGCTAACCAAAAAGAAGCAAATGGACGATGTGAAGAGGGAAATTCTGATCCTGCAGCACCTCTCGGGT…	MGFCFSKPRSNEITINYDSPPPHRFHPRPRPPTTQQPRFQPRYASSDPSLSIAPSSSFSDPSRILEKPYFDIKALYTLERELGRGQFGITRLCTEKTTGRKYACKSISKRRLTKKKQMDDVKREILILQHLSGQPNIVEFKGAYEDLQNVHLVMELCLGGELFDRITAKGSYSESEAASIFRQVVNVVHACHFMGVMHRDLKPENFLLANKDPKAPLKATDFGLSVFIEEDKVYRELVGSAYYVAPEVLQKSYGKEIDVWSAGIILYILLSGVPPFWAETERGIFDTILEGKLDLESAPWPSISAAAKDLIRKMLTRDPKKRITAAEALEHPWMKEGGEASDKPIDNAVLSRMKQFRAMNKMKKLALKVIAENLSEEEIKGLKQMFNNMDTDRSGTITY…	4	Yes	Yes	Pkinase (PF00069.28)-EF-hand_7 (PF13499.9)
PvCDPK29.2	AT1G76040 (AtCPK29)	Phvul.001G002900.1	PvChr1	forward	171533	174640	CCAAAGCAAAAACAGCTTCATTTGCATAACAAAAACACCCTGTTGCATGAGAATCATGGGAATGGGGTTCTCAAAGGTGTTAACACACACCCCAGATGATGAAATTCCAATTTCTTCCACAGATTCTGCTCCTCAACTCACCTACAAACAACCTCGGAAAAACCTCCATGTTCCACCTCAGTTTCCTCCTCCCATGCCAACCCTGTGTTCTTCACAAACAGGACCTGTTCTGGGGAAGCCTTACGTTAAAATAAAGCAGATGTACGAGATGAAGAAGGAGCTGGGAAGAGGCAACTTTGGTGTGACTTATCTGTGTGTGGAGAAGGCCACAGGAATTGCCTATGCATGCAAATCCATATCAAAGAAGGGGCCACAAGAAGTTAAGAATCTTAGAAGAGA…	CCAAAGCAAAAACAGCTTCATTTGCATAACAAAAACACCCTGTTGCATGAGAATCATGGGAATGGGGTTCTCAAAGGTGTTAACACACACCCCAGATGATGAAATTCCAATTTCTTCCACAGATTCTGCTCCTCAACTCACCTACAAACAACCTCGGAAAAACCTCCATGTTCCACCTCAGTTTCCTCCTCCCATGCCAACCCTGTGTTCTTCACAAACAGGACCTGTTCTGGGGAAGCCTTACGTTAAAATAAAGCAGATGTACGAGATGAAGAAGGAGCTGGGAAGAGGCAACTTTGGTGTGACTTATCTGTGTGTGGAGAAGGCCACAGGAATTGCCTATGCATGCAAATCCATATCAAAGAAGGGGCCACAAGAAGTTAAGAATCTTAGAAGAGA…	ATGAGAATCATGGGAATGGGGTTCTCAAAGGTGTTAACACACACCCCAGATGATGAAATTCCAATTTCTTCCACAGATTCTGCTCCTCAACTCACCTACAAACAACCTCGGAAAAACCTCCATGTTCCACCTCAGTTTCCTCCTCCCATGCCAACCCTGTGTTCTTCACAAACAGGACCTGTTCTGGGGAAGCCTTACGTTAAAATAAAGCAGATGTACGAGATGAAGAAGGAGCTGGGAAGAGGCAACTTTGGTGTGACTTATCTGTGTGTGGAGAAGGCCACAGGAATTGCCTATGCATGCAAATCCATATCAAAGAAGGGGCCACAAGAAGTTAAGAATCTTAGAAGAGAAGTTATGATTCTGCAGCATCTTTCAGGGCAACATAACATAGTGGAA…	MRIMGMGFSKVLTHTPDDEIPISSTDSAPQLTYKQPRKNLHVPPQFPPPMPTLCSSQTGPVLGKPYVKIKQMYEMKKELGRGNFGVTYLCVEKATGIAYACKSISKKGPQEVKNLRREVMILQHLSGQHNIVEFKGAYEDREKVHVVMELCSGGELFHRIIAKGRHSERDAATVMRQIVRVVDVCHFMGVMHRDLKPENFLFATKDQDSPLKLTDFGFSVFFHTGEVHTDIVGNACYVAPEVLKRNYGKEIDVWNAGVILYILLSGVPPFWDETEKGELVDALGGKLDMDSEPWPSISDAAKDLIRKMLTYDPKERITATVALEHPWLKEGGEASEKHPDSAVLIRMERFKAMNQMKKLALKVIAENLSEEETKGVRQMFNSMDTDGSGTITFEELKAG…	2	No	Yes	Pkinase (PF00069.28)-EF-hand_7 (PF13499.9)
PvCDPK32	AT3G57530 (AtCPK32)	Phvul.001G135300.1	PvChr1	reverse	37388614	37393061	TTTGACCCTCTCCAAGTTAAGTTCCATCCCCTTTCCTCCTATGATGCTGCCAAACACGCGCTAAATTCATCACCATCATCGCCTTCTTCATTTCTTCATTCATCAAATTCGCAAAACCCTTTTCATAAATCACCCTCCTACCTTCTCTCTCTCTCTCAACCTAATTCCATTTCACTCAACCACGTTTTTTAATCTTTTTTGTTAATTCTCCTTTTCCTAAGCCTCCATTTGATTTCTTGTTTGGGAAGAAGGTTTGGTCTTCAGATCTGAGGAACCTCGTGGCCCCCGAAGATGGGTATCTGCTGCGCGAAGCCGTCCACGCAGGAAACGGAGAACAAGAAGGGAAAAAAGGGGAAAAAGGAGAACCCCTTCGCTATCGATTACGGGTTTAACAACACT…	TTTGACCCTCTCCAAGTTAAGTTCCATCCCCTTTCCTCCTATGATGCTGCCAAACACGCGCTAAATTCATCACCATCATCGCCTTCTTCATTTCTTCATTCATCAAATTCGCAAAACCCTTTTCATAAATCACCCTCCTACCTTCTCTCTCTCTCTCAACCTAATTCCATTTCACTCAACCACGTTTTTTAATCTTTTTTGTTAATTCTCCTTTTCCTAAGCCTCCATTTGATTTCTTGTTTGGGAAGAAGGTTTGGTCTTCAGATCTGAGGAACCTCGTGGCCCCCGAAGATGGGTATCTGCTGCGCGAAGCCGTCCACGCAGGAAACGGAGAACAAGAAGGGAAAAAAGGGGAAAAAGGAGAACCCCTTCGCTATCGATTACGGGTTTAACAACACT…	ATGGGTATCTGCTGCGCGAAGCCGTCCACGCAGGAAACGGAGAACAAGAAGGGAAAAAAGGGGAAAAAGGAGAACCCCTTCGCTATCGATTACGGGTTTAACAACACTGCCAACGCCAACGGCTCCAAGCTCACCGTTTTGAAGTCTCCCACAGGCCGTGAGATCGAGGCCCGTTACGAGCTGGGCCGCGAGCTGGGCCGGGGCGAGTTCGGCGTCACGTACCTCTGCACGGACAAGGAGAGCGGCGAGGAACTTGCCTGCAAGTCCATTTCCAAGAAGAAGCTGAGGACCGCCATCGACATCGAGGATGTCAGGAGAGAGGTTGAGATCATGCGCCACTTGCCGCAGCATCCCAACATCGTCACCTTAAAGGACACCTACGAGGACGACAATGCCGTT…	MGICCAKPSTQETENKKGKKGKKENPFAIDYGFNNTANANGSKLTVLKSPTGREIEARYELGRELGRGEFGVTYLCTDKESGEELACKSISKKKLRTAIDIEDVRREVEIMRHLPQHPNIVTLKDTYEDDNAVHLVMELCEGGELFDRIVARGHYTERAAAAVTKTIVEVVQMCHKHGVMHRDLKPENFLFANKKETAALKTIDFGLSVFFKPGERFNEIVGSPYYMAPEVLKRNYGPEVDIWSAGVILYILLCGVPPFWAETEQGVAQAIIRSIVDFKRDPWPKVSDNAKDLVRKMLDPDPRRRLTAQEVIDHPWLQNAKKAPNVSLGETVRARLKQFSVMNKLKKRALRVIAEHLTVEEAAGLKEGFKLMDTNNRGKINIDELRVGLHKLGHQVPDS…	3	No	Yes	Pkinase (PF00069.28)-EF-hand_7 (PF13499.9)
AtGene Name		Phytozome ID	Chromosome Name	Strand	Gene Start (bp)	Gene End (bp)	Genomic	Transcript	CDS	Peptide
AtCPK1		AT5G04870.1	AtChr5	reverse	1416782	1420338	AAGTGTAGTGCTATTAAACTATCCCTTTTATTTTCCCACCCAACTCAATTTATTTTCTCATTCTTTCTCTTTACTCTTCTTCAGATCTCTCTGTTTCTTTCTTTGTTGTTGTTATCTGGGGATGCTTTCTACTCTCTGTTTGGTTTCCTTCATTGTGACTTTCTATTTTCTGGGTTTGTTTCAAGTCATGATTTTTCCGATACCCTTTTGATTTTTCTTGCTATTTCTCACCTCTGTATAAGCAAGCTCTCTGCTGTTTCTCCTCATCCAAGTTGGGTTTATCAGTTCAGCTGTGTAGAAATTCAATCGTCTGAGAAGTCCGAGGTTTGATGTCTGATGGTTTTAAGATCGAAAGGATTTGACTTTTATCAGATTAGTAATGAGATTAGATTGTTTTTG…	AGAGACAGATCTGTTGATGACTATTAATCAAAGATATCTTCTTCTTTTGTTATTTTTAGTCAGGATGTGGAGACGTTGGCGAGAATATTGCAAAACCATGTTCAACAATGTGTATCATCGGATCTGCACCAATCTGACTTAATTTTCATCCATTCTTATCATCTTTGTCTGATCTTGCTATGGGACTTGCTCTGTTTTCCTCTGATGGCAAACTAATTTGGAAGGGGAGCACACAAACTGGCAAAAGACGCCCCCAGGAAGAAGCCACAATGAAGCACAGCGGTGGGAACCAAGCCTGCTATGTTCTTGGTCAAAAGACCCCAAGCATCCGAGATCTCTACTCGTTGGGACACAAACTAGGTCAAGGACAGTTTGGGACGACTTACATGTGCAAAGAGA…	ATGGGACTTGCTCTGTTTTCCTCTGATGGCAAACTAATTTGGAAGGGGAGCACACAAACTGGCAAAAGACGCCCCCAGGAAGAAGCCACAATGAAGCACAGCGGTGGGAACCAAGCCTGCTATGTTCTTGGTCAAAAGACCCCAAGCATCCGAGATCTCTACTCGTTGGGACACAAACTAGGTCAAGGACAGTTTGGGACGACTTACATGTGCAAAGAGATCTCAACAGGGCGTGAATACGCATGCAAGTCTATAACAAAACGAAAGTTGATATCAAAGGAAGATGTGGAAGACGTACGCAGGGAAATTCAAATCATGCACCATCTGGCTGGCTACAAGAACATTGTCACCATTAAAGGTGCTTACGAGGATCCATTGTATGTTCACATCGTGATGGAG…	MGNTCVGPSRNGFLQSVSAAMWRPRDGDDSASMSNGDIASEAVSGELRSRLSDEVQNKPPEQVTMPKPGTDVETKDREIRTESKPETLEEISLESKPETKQETKSETKPESKPDPPAKPKKPKHMKRVSSAGLRTESVLQRKTENFKEFYSLGRKLGQGQFGTTFLCVEKTTGKEFACKSIAKRKLLTDEDVEDVRREIQIMHHLAGHPNVISIKGAYEDVVAVHLVMECCAGGELFDRIIQRGHYTERKAAELTRTIVGVVEACHSLGVMHRDLKPENFLFVSKHEDSLLKTIDFGLSMFFKPDDVFTDVVGSPYYVAPEVLRKRYGPEADVWSAGVIVYILLSGVPPFWAETEQGIFEQVLHGDLDFSSDPWPSISESAKDLVRKMLVRDPKKRLTA…
AtCPK2		AT3G10660.1	AtChr3	reverse	3331397	3334268	ATGGGTAATGCTTGCGTTGGACCAAACATTTCTGGAAATGGTTTCTTGCAAACTGTTACGGCTGCAATGTGGAGGCCACGGATCGGAGCTGAGCAAGCTTCTTCTTCTTCCCATGGTAATGGACAAGTTTCTAAAGAAGCAGCTTCAGAACCAGCTACTGATCAAGTCCAGAATAAACCCCCTGAGCCTATCACAATGCCAAGCTCAAAGACCAATCCCGAAACTAAACTGAAACCCGATCTAGAGATCCAACCTGAAGAAAAGAAGGAGAAAGTTCTTGCAGAAGAAACCAAGCAGAAAGTTGTTCCTGAAGAAAGTAAGCAGGAAGTTCCTCCTGAAGAAAGTAAGCGGGAAGTTGTTGTGCAGCCGGAGTCAGCAAAACCAGAAACAAAGTCTGAA…	ATGGGTAATGCTTGCGTTGGACCAAACATTTCTGGAAATGGTTTCTTGCAAACTGTTACGGCTGCAATGTGGAGGCCACGGATCGGAGCTGAGCAAGCTTCTTCTTCTTCCCATGGTAATGGACAAGTTTCTAAAGAAGCAGCTTCAGAACCAGCTACTGATCAAGTCCAGAATAAACCCCCTGAGCCTATCACAATGCCAAGCTCAAAGACCAATCCCGAAACTAAACTGAAACCCGATCTAGAGATCCAACCTGAAGAAAAGAAGGAGAAAGTTCTTGCAGAAGAAACCAAGCAGAAAGTTGTTCCTGAAGAAAGTAAGCAGGAAGTTCCTCCTGAAGAAAGTAAGCGGGAAGTTGTTGTGCAGCCGGAGTCAGCAAAACCAGAAACAAAGTCTGAA…	ATGGGTAATGCTTGCGTTGGACCAAACATTTCTGGAAATGGTTTCTTGCAAACTGTTACGGCTGCAATGTGGAGGCCACGGATCGGAGCTGAGCAAGCTTCTTCTTCTTCCCATGGTAATGGACAAGTTTCTAAAGAAGCAGCTTCAGAACCAGCTACTGATCAAGTCCAGAATAAACCCCCTGAGCCTATCACAATGCCAAGCTCAAAGACCAATCCCGAAACTAAACTGAAACCCGATCTAGAGATCCAACCTGAAGAAAAGAAGGAGAAAGTTCTTGCAGAAGAAACCAAGCAGAAAGTTGTTCCTGAAGAAAGTAAGCAGGAAGTTCCTCCTGAAGAAAGTAAGCGGGAAGTTGTTGTGCAGCCGGAGTCAGCAAAACCAGAAACAAAGTCTGAA…	MGNACVGPNISGNGFLQTVTAAMWRPRIGAEQASSSSHGNGQVSKEAASEPATDQVQNKPPEPITMPSSKTNPETKLKPDLEIQPEEKKEKVLAEETKQKVVPEESKQEVPPEESKREVVVQPESAKPETKSESKPETTKPETTSETKPETKAEPQKPKHMRRVSSAGLRTESVLQRKTENFKEFYSLGRKLGQGQFGTTFLCLEKGTGNEYACKSISKRKLLTDEDVEDVRREIQIMHHLAGHPNVISIKGAYEDVVAVHLVMELCSGGELFDRIIQRGHYTERKAAELARTIVGVLEACHSLGVMHRDLKPENFLFVSREEDSLLKTIDFGLSMFFKPDEVFTDVVGSPYYVAPEVLRKRYGPESDVWSAGVIVYILLSGVPPFWAETEQGIFEQVL…
AtCPK3		AT4G23650.1	AtChr4	reverse	12324757	12327459	TTCTCTCTCGATTGACTTTATTGACTGAGAGAAAGCTTTTGACAATGGGCCACAGACACAGCAAGTCCAAATCCTCCGATCCGCCACCGTCCTCCTCCTCCTCTTCCTCCGGCAACGTAGTCCACCATGTTAAACCTGCCGGAGAACGCCGCGGATCATCCGGTTCCGGAACCGTCGGATCGTCAGGCTCCGGAACAGGCGGATCTCGTTCCACCACATCTACTCAGCAGAATGGTCGGATCTTAGGTCGGCCGATGGAGGAAGTACGGAGAACCTATGAGTTTGGTCGTGAGCTTGGTCGTGGCCAGTTTGGTGTCACGTACCTCGTAACTCACAAAGAGACGAAACAACAGGTCGCTTGCAAGTCAATCCCTACGCGCCGCCTTGTTCACAAAGACG…	TTCTCTCTCGATTGACTTTATTGACTGAGAGAAAGCTTTTGACAATGGGCCACAGACACAGCAAGTCCAAATCCTCCGATCCGCCACCGTCCTCCTCCTCCTCTTCCTCCGGCAACGTAGTCCACCATGTTAAACCTGCCGGAGAACGCCGCGGATCATCCGGTTCCGGAACCGTCGGATCGTCAGGCTCCGGAACAGGCGGATCTCGTTCCACCACATCTACTCAGCAGAATGGTCGGATCTTAGGTCGGCCGATGGAGGAAGTACGGAGAACCTATGAGTTTGGTCGTGAGCTTGGTCGTGGCCAGTTTGGTGTCACGTACCTCGTAACTCACAAAGAGACGAAACAACAGGTCGCTTGCAAGTCAATCCCTACGCGCCGCCTTGTTCACAAAGACG…	ATGGGCCACAGACACAGCAAGTCCAAATCCTCCGATCCGCCACCGTCCTCCTCCTCCTCTTCCTCCGGCAACGTAGTCCACCATGTTAAACCTGCCGGAGAACGCCGCGGATCATCCGGTTCCGGAACCGTCGGATCGTCAGGCTCCGGAACAGGCGGATCTCGTTCCACCACATCTACTCAGCAGAATGGTCGGATCTTAGGTCGGCCGATGGAGGAAGTACGGAGAACCTATGAGTTTGGTCGTGAGCTTGGTCGTGGCCAGTTTGGTGTCACGTACCTCGTAACTCACAAAGAGACGAAACAACAGGTCGCTTGCAAGTCAATCCCTACGCGCCGCCTTGTTCACAAAGACGACATTGAAGATGTTCGCCGTGAAGTCCAGATTATGCACCATCTC…	MGHRHSKSKSSDPPPSSSSSSSGNVVHHVKPAGERRGSSGSGTVGSSGSGTGGSRSTTSTQQNGRILGRPMEEVRRTYEFGRELGRGQFGVTYLVTHKETKQQVACKSIPTRRLVHKDDIEDVRREVQIMHHLSGHRNIVDLKGAYEDRHSVNLIMELCEGGELFDRIISKGLYSERAAADLCRQMVMVVHSCHSMGVMHRDLKPENFLFLSKDENSPLKATDFGLSVFFKPGDKFKDLVGSAYYVAPEVLKRNYGPEADIWSAGVILYILLSGVPPFWGENETGIFDAILQGQLDFSADPWPALSDGAKDLVRKMLKYDPKDRLTAAEVLNHPWIREDGEASDKPLDNAVLSRMKQFRAMNKLKKMALKVIAENLSEEEIIGLKEMFKSLDTDNNGIV…
AtCPK4		AT4G09570.1	AtChr4	forward	6049516	6052335	AATTCTAAGGCCCAATTAAGGCCTCCAGAGCAGCCCAATCTGAGATCTCGATATATTTTTTCCGGTATATGAAAAAAAAGTCCAAAATCCAGCTCAAAATTCAAATCTTTCAAAAATTTCTTACAGTTCGAGTCAAACATATACAATAATACAAACCACAAATGTGTTCTCAATCAAATTCCTCCAAGTTTATCTTCTTCTTCAATCCAAGAAGAAAGTCTACGAAAAGTCTCCTCCTTTACTAATGGGTTGTTTCAGCAGTAAACACCGGAAAACTCAAAACGACGGCGGCGGAGAAAGATCAATTCCGATAATTCCAGTTCAAACCCATATCGTTGATCAAGTCCCCGATCATCGTAAACCTCAAATCCCATCACCATCGATACCCATCTCAGTTCG…	GATAAACACCAAAAAAAGGCAGAGACTTTCGAAATCAAGAACAATGGAGAAACCAAACCCTAGAAGACCCTCAAACAGTGTTCTTCCATACGAAACACCAAGATTAAGAGATCACTATCTCCTCGGCAAAAAGCTAGGCCAAGGCCAATTTGGAACAACCTATCTCTGTACAGAGAAATCATCATCAGCTAATTACGCTTGCAAATCAATCCCAAAACGTAAGCTTGTATGTCGTGAAGACTACGAAGATGTATGGCGTGAGATTCAGATCATGCATCATCTCTCTGAGCATCCTAATGTTGTTAGAATCAAGGGTACTTATGAAGACTCTGTTTTTGTTCACATTGTTATGGAAGTTTGTGAAGGTGGTGAGCTTTTTGATCGGATTGTTTCTAAAGG…	ATGGGTTGTTTCAGCAGTAAACACCGGAAAACTCAAAACGACGGCGGCGGAGAAAGATCAATTCCGATAATTCCAGTTCAAACCCATATCGTTGATCAAGTCCCCGATCATCGTAAACCTCAAATCCCATCACCATCGATACCCATCTCAGTTCGAGATCCAGAGACGATTTTAGGTAAACCATTCGAAGACATCAGGAAATTTTACAGCTTGGGGAGAGAATTAGGTCGAGGTGGTTTAGGGATTACGTATATGTGCAAAGAGATTGGGACTGGGAACATTTATGCTTGCAAATCGATTCTCAAGAGGAAGCTAATTAGTGAGCTGGGTAGAGAAGATGTGAAGACAGAGATTCAGATCATGCAGCATTTGTCTGGACAACCAAACGTTGTTGAGATC…	MEKPNPRRPSNSVLPYETPRLRDHYLLGKKLGQGQFGTTYLCTEKSSSANYACKSIPKRKLVCREDYEDVWREIQIMHHLSEHPNVVRIKGTYEDSVFVHIVMEVCEGGELFDRIVSKGCFSEREAAKLIKTILGVVEACHSLGVMHRDLKPENFLFDSPSDDAKLKATDFGLSVFYKPGQYLYDVVGSPYYVAPEVLKKCYGPEIDVWSAGVILYILLSGVPPFWAETESGIFRQILQGKIDFKSDPWPTISEGAKDLIYKMLDRSPKKRISAHEALCHPWIVDEHAAPDKPLDPAVLSRLKQFSQMNKIKKMALRVIAERLSEEEIGGLKELFKMIDTDNSGTITFEELKAGLKRVGSELMESEIKSLMDAADIDNSGTIDYGEFLAATLHINKMER…
AtCPK5		AT4G35310.1	AtChr4	forward	16801986	16804995	AAAATATTGTAGCTTTCCTTTGTTGTTCGACTTTTCTCTTTTGTCTCCCCTAAATTTAGTTTCTCCTTTTAAGTCAGATTCCTTCCTAATCCCATTCTTTCAGTCTTCTCTTTCGCCCTTCTGAGTTCAACAACTGGTAACTAGATCCTCTTTTTGCTTTACTTCATTCTCTGTTTTGTTATTCCTTTAAAAGATCCATCGAAACTTCTTAGCTCTTTGTCTTTTTTTTGGTTATTTTGACTCTTTGATCTGATGTGGGTTTTGCGTCTTTCTTTACTTGTGGTATTGTTAAAGTTCGTTACTTTGTTCTCGTTTAGCTTCTTGTATTTGGTCTAATTTAAGTCTTTTGACTTTTGACAGTGTTATCTCTATGAACAGTTCCTTTGATGAAGAACACAA…	AAAATATTGTAGCTTTCCTTTGTTGTTCGACTTTTCTCTTTTGTCTCCCCTAAATTTAGTTTCTCCTTTTAAGTCAGATTCCTTCCTAATCCCATTCTTTCAGTCTTCTCTTTCGCCCTTCTGAGTTCAACAACTGTGTTATCTCTATGAACAGTTCCTTTGATGAAGAACACAAAGTGAAAGTTGCTGTCTTTATAACCAGGATTTGGTAATTCCCATTGTTTCATGGGCAATTCTTGCCGTGGATCTTTCAAGGACAAACTCGACGAAGGCGATAACAATAAGCCTGAAGATTACTCTAAAACCTCTACCACCAACTTGTCTTCTAATTCCGACCATTCACCGAACGCTGCAGACATCATTGCTCAAGAATTCTCCAAAGACAACAACAGCAACAAC…	ATGGGCAATTCTTGCCGTGGATCTTTCAAGGACAAACTCGACGAAGGCGATAACAATAAGCCTGAAGATTACTCTAAAACCTCTACCACCAACTTGTCTTCTAATTCCGACCATTCACCGAACGCTGCAGACATCATTGCTCAAGAATTCTCCAAAGACAACAACAGCAACAACAACAGCAAAGATCCAGCTCTTGTTATTCCTTTAAGAGAACCAATCATGAGGCGTAACCCAGACAATCAAGCTTACTATGTTCTTGGTCATAAGACACCAAACATTCGTGATATCTATACCCTTAGCCGCAAGCTAGGTCAAGGTCAATTTGGAACGACTTATCTATGTACAGAGATTGCCTCAGGCGTTGACTACGCTTGTAAGTCAATATCCAAGAGGAAGTTG…	MGNSCRGSFKDKLDEGDNNKPEDYSKTSTTNLSSNSDHSPNAADIIAQEFSKDNNSNNNSKDPALVIPLREPIMRRNPDNQAYYVLGHKTPNIRDIYTLSRKLGQGQFGTTYLCTEIASGVDYACKSISKRKLISKEDVEDVRREIQIMHHLAGHGSIVTIKGAYEDSLYVHIVMELCAGGELFDRIIQRGHYSERKAAELTKIIVGVVEACHSLGVMHRDLKPENFLLVNKDDDFSLKAIDFGLSVFFKPGQIFTDVVGSPYYVAPEVLLKRYGPEADVWTAGVILYILLSGVPPFWAETQQGIFDAVLKGYIDFESDPWPVISDSAKDLIRRMLSSKPAERLTAHEVLRHPWICENGVAPDRALDPAVLSRLKQFSAMNKLKKMALKVIAESLSEEE…
AtCPK6		AT2G17290.1	AtChr2	forward	7516414	7519633	CCACAAAAGAATCAATCTTTTTAACACTCTCTAATGATTCAACGAATCCAATTACCCAACCAGAAACAGCAACACATATAGAGATATATACTATTAAACAATAACATAACAAAGAAACCATTTTTTCTCTTTTGTTATTGACTTAAACAAAAACTATCAACGAATAATTATCCTTTTTTGAGTTTTTCCCATTTCTTCTTCGTCTCCATTTCATCGTCTTCTCGCTGTTCTGCTATATTCCGGTACTAGATCCTCTGTTTTCTCATGTTTCTTTTATTACCAAATGATTTCTTCATTTATTGTTGTGTCTTTGATTCTTTTTTGGGATCTATAATGATCGATGAACATTTAAAGCTACGACTTTTCAGGAGCTCTTGTCTTTTTTTCTTTAATCTTTGA…	CCACAAAAGAATCAATCTTTTTAACACTCTCTAATGATTCAACGAATCCAATTACCCAACCAGAAACAGCAACACATATAGAGATATATACTATTAAACAATAACATAACAAAGAAACCATTTTTTCTCTTTTGTTATTGACTTAAACAAAAACTATCAACGAATAATTATCCTTTTTTGAGTTTTTCCCATTTCTTCTTCGTCTCCATTTCATCGTCTTCTCGCTGTTCTGCTATATTCCGTTTCGTTGGATGAGGAGAAGAAGAAAGTGAAAAAAGTTGTGAAATAGAGAGAGTTTGTTTCATGGGCAATTCATGTCGTGGTTCTTTTAAGGACAAAATCTACGAGGGCAATCATAGTAGGCCCGAGGAGAATTCCAAATCCACCACCACTACTGTT…	ATGGGCAATTCATGTCGTGGTTCTTTTAAGGACAAAATCTACGAGGGCAATCATAGTAGGCCCGAGGAGAATTCCAAATCCACCACCACTACTGTTTCCTCTGTTCATTCTCCTACTACAGACCAAGATTTCTCCAAACAGAACACCAATCCAGCTCTTGTGATTCCTGTTAAAGAACCCATTATGCGGCGTAACGTTGACAATCAATCTTACTATGTTCTTGGTCACAAGACTCCTAACATTCGTGATCTTTACACGTTGAGTCGTAAGTTAGGACAAGGACAATTCGGGACAACGTATTTGTGTACTGATATTGCCACAGGTGTTGACTATGCTTGTAAGTCTATATCCAAGAGGAAATTGATATCTAAAGAAGATGTTGAGGATGTTAGGAGGGAG…	MGNSCRGSFKDKIYEGNHSRPEENSKSTTTTVSSVHSPTTDQDFSKQNTNPALVIPVKEPIMRRNVDNQSYYVLGHKTPNIRDLYTLSRKLGQGQFGTTYLCTDIATGVDYACKSISKRKLISKEDVEDVRREIQIMHHLAGHKNIVTIKGAYEDPLYVHIVMELCAGGELFDRIIHRGHYSERKAAELTKIIVGVVEACHSLGVMHRDLKPENFLLVNKDDDFSLKAIDFGLSVFFKPGQIFKDVVGSPYYVAPEVLLKHYGPEADVWTAGVILYILLSGVPPFWAETQQGIFDAVLKGYIDFDTDPWPVISDSAKDLIRKMLCSSPSERLTAHEVLRHPWICENGVAPDRALDPAVLSRLKQFSAMNKLKKMALKVIAESLSEEEIAGLRAMFEAMD…
AtCPK7		AT5G12480.1	AtChr5	reverse	4047514	4050533	ATGGAAACACATAAAAAATTAAGAGTTGTCATTCTTTGAATCCCCGCAAGCAAGAAGAAGAAGAAGAAGAAGAGAGTCAATTTGTGTGTTTTGTCATTTGAAGAAGAGAGAGAAAGAGGAAGACTTTGACTCGTCTTCTTCCTCTCTTCTTCTCTCTCTATCACTGCATTTGTTTTTCCTCACAGCGTATGATGACTTTTCTCTTTAATTTATCCTTTTTAGCTACATATCTTCTTTTGCTTCAACTGATTTATACCCATTTAAATGTTTCTACCCATTATAAGTTCTGAGGTCTGTGTTTTCCCTCTTTCCCTTGTCTTTGATCTTAGCTAGGGTTTACTAATCTGGTTTGAGTATATTAGATTAGGGTTCTGTTTGATTTAGGATATGTTGTTAATT…	ATGGAAACACATAAAAAATTAAGAGTTGTCATTCTTTGAATCCCCGCAAGCAAGAAGAAGAAGAAGAAGAAGAGAGTCAATTTGTGTGTTTTGTCATTTGAAGAAGAGAGAGAAAGAGGAAGACTTTGACTCGTCTTCTTCCTCTCTTCTTCTCTCTCTATCACTGCATTTGTTTTTCCTCACAGCGAACCTTGAGATTTGATTAGATGGGGAATTGTTGTGGCAATCCGAGTTCGGCTACGAACCAGAGTAAACAAGGGAAACCCAAGAACAAAAACAATCCTTTTTACAGCAATGAATACGCTACAACAGATAGATCTGGAGCTGGTTTTAAGCTCTCTGTGCTGAAAGATCCTACAGGACATGATATATCCTTGCAGTATGATCTTGGACGTGAGG…	ATGGGGAATTGTTGTGGCAATCCGAGTTCGGCTACGAACCAGAGTAAACAAGGGAAACCCAAGAACAAAAACAATCCTTTTTACAGCAATGAATACGCTACAACAGATAGATCTGGAGCTGGTTTTAAGCTCTCTGTGCTGAAAGATCCTACAGGACATGATATATCCTTGCAGTATGATCTTGGACGTGAGGTTGGTCGAGGCGAGTTTGGTATAACTTACTTGTGTACTGATAAGGAAACTGGTGAGAAGTATGCCTGCAAGTCCATATCTAAGAAGAAGCTGAGAACAGCAGTTGATATAGAGGATGTTAGGAGGGAGGTTGAGATTATGAAGCATATGCCTAAACACCCAAATGTCGTCTCTTTGAAGGATTCCTTTGAGGATGATGATGCGGTG…	MGNCCGNPSSATNQSKQGKPKNKNNPFYSNEYATTDRSGAGFKLSVLKDPTGHDISLQYDLGREVGRGEFGITYLCTDKETGEKYACKSISKKKLRTAVDIEDVRREVEIMKHMPKHPNVVSLKDSFEDDDAVHIVMELCEGGELFDRIVARGHYTERAAAAVMKTIVEVVQICHKQGVMHRDLKPENFLFANKKETSALKAIDFGLSVFFKPGEQFNEIVGSPYYMAPEVLRRNYGPEIDVWSAGVILYILLCGVPPFWAETEQGVAQAIIRSVIDFKRDPWPRVSDSAKDLVRKMLEPDPKKRLTAAQVLEHTWILNAKKAPNVSLGETVKARLKQFSVMNKLKKRALRVIAEHLSVEEAAGIKEAFEMMDVNKRGKINLEELKYGLQKAGQQIADT…
AtCPK8		AT5G19450.1	AtChr5	reverse	6558425	6562000	ATAGAGAGAACCCAAAAACCAAAAAAAAAGAGTCTCTCTTTGCTCTCACCACACTAAGAAAGAAGAAGCGAGGGAGAAGGAGACTTTTTGACTCTTCTGCTTCTTCTCCTTTCTCTCTGTCACTTATTTCCCCTCTTTGCTTCCGTCGATTCATCCCAATCTGATCATCTCTTTCTCCGGTTAAGGTCTCAGGTTTGTGTTTCCCCTTTCTAATTAAAGCTTCATCCTTTTTGGGTTTCACCTGATTTCATTTGCTAGGGTTTACTTATCAGCTCTTCAATTTCTAGGGTTCTTAATTTCGTTGCATTTTTTGTTCTCGATCGTTTGTTTTGCCCTTTTATCAAATCGAATTTGTCTTGCTGTAAGTTTTAGGGATTAGTGAGAGTCTTTAATTCCTTA…	TTGCGTTTGTGAGTGATTTAGTTGTTTGATGAAATCTCAGGACTTCTCAGATTCGAATTATAAATGGGAAATTGTTGTGCGAGCCCGGGTTCGGAGACTGGGAGTAAGAAGGGGAAACCAAAGATCAAAAGTAACCCGTTTTATAGTGAAGCATACACTACGAATGGATCTGGAACTGGGTTCAAGCTCTCTGTTTTGAAAGATCCAACAGGACATGATATATCTCTTATGTATGATCTGGGGCGTGAGGTTGGTCGCGGAGAGTTTGGTATTACTTACTTGTGCACTGATATCAAAACGGGCGAGAAGTATGCGTGCAAGTCTATATCAAAGAAGAAGCTTAGAACAGCTGTGGATATAGAGGATGTTAGGAGGGAAGTTGAGATAATGAAACATATG…	ATGGGAAATTGTTGTGCGAGCCCGGGTTCGGAGACTGGGAGTAAGAAGGGGAAACCAAAGATCAAAAGTAACCCGTTTTATAGTGAAGCATACACTACGAATGGATCTGGAACTGGGTTCAAGCTCTCTGTTTTGAAAGATCCAACAGGACATGATATATCTCTTATGTATGATCTGGGGCGTGAGGTTGGTCGCGGAGAGTTTGGTATTACTTACTTGTGCACTGATATCAAAACGGGCGAGAAGTATGCGTGCAAGTCTATATCAAAGAAGAAGCTTAGAACAGCTGTGGATATAGAGGATGTTAGGAGGGAAGTTGAGATAATGAAACATATGCCTAGACACCCAAATATCGTGTCGCTGAAGGATGCCTTTGAGGATGATGATGCAGTGCATATA…	MGNCCASPGSETGSKKGKPKIKSNPFYSEAYTTNGSGTGFKLSVLKDPTGHDISLMYDLGREVGRGEFGITYLCTDIKTGEKYACKSISKKKLRTAVDIEDVRREVEIMKHMPRHPNIVSLKDAFEDDDAVHIVMELCEGGELFDRIVARGHYTERAAAAVMKTILEVVQICHKHGVMHRDLKPENFLFANKKETSALKAIDFGLSVFFKPGEGFNEIVGSPYYMAPEVLRRNYGPEVDIWSAGVILYILLCGVPPFWAETEQGVAQAIIRSVIDFKRDPWPRVSETAKDLVRKMLEPDPKKRLSAAQVLEHSWIQNAKKAPNVSLGETVKARLKQFSVMNKLKKRALRVIAEHLSVEEVAGIKEAFEMMDSKKTGKINLEELKFGLHKLGQQQIPDTD…
AtCPK9		AT3G20410.1	AtChr3	forward	7116200	7119121	ATTATAATCCCTCAACAATTTTAAAAAAAGATCCTGACTTTCAATTTTCTCTCTTGTTTCTTCTTTTGATCATCTTCAACAAAAAAAAGTTACGATCTTTCTCTCCGGGTCATCGGAATTTGAGCTAGCTTAGCTAAAGTTCCGATCTTTCCTCTCTGGGTCGTCGGAATTTGAGCTTTTTAAAATCATGGGAAATTGTTTTGCCAAGAACCATGGATTGATGAAGCCACAGCAAAATGGTAATACCACTAGATCAGTTGAAGTAGGAGTAACCAACCAAGATCCACCGTCGTATACTCCACAAGCGAGAACCACTCAGCAGCCGGAGAAACCAGGTTCCGTGAATAGTCAACCACCACCGTGGAGGGCGGCGGCTGCAGCACCAGGACTAAGTCCCAA…	ATTATAATCCCTCAACAATTTTAAAAAAAGATCCTGACTTTCAATTTTCTCTCTTGTTTCTTCTTTTGATCATCTTCAACAAAAAAAAGTTACGATCTTTCTCTCCGGGTCATCGGAATTTGAGCTAGCTTAGCTAAAGTTCCGATCTTTCCTCTCTGGGTCGTCGGAATTTGAGCTTTTTAAAATCATGGGAAATTGTTTTGCCAAGAACCATGGATTGATGAAGCCACAGCAAAATGGTAATACCACTAGATCAGTTGAAGTAGGAGTAACCAACCAAGATCCACCGTCGTATACTCCACAAGCGAGAACCACTCAGCAGCCGGAGAAACCAGGTTCCGTGAATAGTCAACCACCACCGTGGAGGGCGGCGGCTGCAGCACCAGGACTAAGTCCCAA…	ATGGGAAATTGTTTTGCCAAGAACCATGGATTGATGAAGCCACAGCAAAATGGTAATACCACTAGATCAGTTGAAGTAGGAGTAACCAACCAAGATCCACCGTCGTATACTCCACAAGCGAGAACCACTCAGCAGCCGGAGAAACCAGGTTCCGTGAATAGTCAACCACCACCGTGGAGGGCGGCGGCTGCAGCACCAGGACTAAGTCCCAAGACCACCACTAAGAGCAATTCAATACTAGAGAACGCTTTCGAAGACGTGAAGCTCTTTTACACATTGGGTAAAGAGCTAGGTCGTGGTCAATTTGGGGTAACGTATCTGTGCACAGAGAATTCCACGGGGAAGAAGTACGCTTGCAAATCGATCTCGAAGAAGAAGCTGGTGACTAAAGCTGATAAG…	MGNCFAKNHGLMKPQQNGNTTRSVEVGVTNQDPPSYTPQARTTQQPEKPGSVNSQPPPWRAAAAAPGLSPKTTTKSNSILENAFEDVKLFYTLGKELGRGQFGVTYLCTENSTGKKYACKSISKKKLVTKADKDDMRREIQIMQHLSGQPNIVEFKGAYEDEKAVNLVMELCAGGELFDRIIAKGHYTERAAASVCRQIVNVVKICHFMGVLHRDLKPENFLLSSKDEKALIKATDFGLSVFIEEGKVYRDIVGSAYYVAPEVLRRRYGKEVDIWSAGIILYILLSGVPPFWAETEKGIFDAILEGHIDFESQPWPSISSSAKDLVRRMLTADPKRRISAADVLQHPWLREGGEASDKPIDSAVLSRMKQFRAMNKLKKLALKVIAENIDTEEIQGLKA…
AtCPK10		AT1G18890.1	AtChr1	reverse	6522763	6525962	GAATCAAACAAAATCCGAAATTTCGAAAGGTCCGACTTTTCCTCACCTGAACCCGCGTTTTCTCTCCCCCTCCCAACCCAACTCTCCAATTCGCCGGAAAATCACCGCCACCGTCACTTCCGGCGTCCATATGAACTAAAGAGATAAGCTTTTTTCTTCTATAATCCTTCTTCTTCTTCTTCCTTGATCTCCTTTCTCTGAGTTTGCTGAGTTTCTTAACTCAGCCATGGGTAACTGTAACGCCTGTGTAAGGCCAGACTCAAAAGAATCAAAACCATCTTCAAAGCCGAAAAAACCCAATCGAGATCGGAAATTAAACCCATTCGCCGGAGATTTCACCAGATCCCCAGCTCCAATACGTGTTCTCAAAGATGTAATCCCTATGAGCAATCAAACTCA…	GAATCAAACAAAATCCGAAATTTCGAAAGGTCCGACTTTTCCTCACCTGAACCCGCGTTTTCTCTCCCCCTCCCAACCCAACTCTCCAATTCGCCGGAAAATCACCGCCACCGTCACTTCCGGCGTCCATATGAACTAAAGAGATAAGCTTTTTTCTTCTATAATCCTTCTTCTTCTTCTTCCTTGATCTCCTTTCTCTGAGTTTGCTGAGTTTCTTAACTCAGCCATGGGTAACTGTAACGCCTGTGTAAGGCCAGACTCAAAAGAATCAAAACCATCTTCAAAGCCGAAAAAACCCAATCGAGATCGGAAATTAAACCCATTCGCCGGAGATTTCACCAGATCCCCAGCTCCAATACGTGTTCTCAAAGATGTAATCCCTATGAGCAATCAAACTCA…	ATGGGTAACTGTAACGCCTGTGTAAGGCCAGACTCAAAAGAATCAAAACCATCTTCAAAGCCGAAAAAACCCAATCGAGATCGGAAATTAAACCCATTCGCCGGAGATTTCACCAGATCCCCAGCTCCAATACGTGTTCTCAAAGATGTAATCCCTATGAGCAATCAAACTCAGATCAGCGACAAATACATCTTAGGTCGTGAATTAGGTCGAGGCGAATTCGGAATCACTTACCTCTGTACTGATCGTGAAACCCACGAAGCTTTAGCTTGCAAATCGATTTCAAAGCGAAAGCTTCGAACAGCTGTCGATATCGAAGACGTTCGTCGTGAGGTAGCGATTATGTCTACTTTACCTGAGCATCCAAACGTAGTTAAGCTTAAGGCTAGTTATGAGGAT…	MGNCNACVRPDSKESKPSSKPKKPNRDRKLNPFAGDFTRSPAPIRVLKDVIPMSNQTQISDKYILGRELGRGEFGITYLCTDRETHEALACKSISKRKLRTAVDIEDVRREVAIMSTLPEHPNVVKLKASYEDNENVHLVMELCEGGELFDRIVARGHYTERAAAAVARTIAEVVMMCHSNGVMHRDLKPENFLFANKKENSPLKAIDFGLSVFFKPGDKFTEIVGSPYYMAPEVLKRDYGPGVDVWSAGVIIYILLCGVPPFWAETEQGVALAILRGVLDFKRDPWPQISESAKSLVKQMLDPDPTKRLTAQQVLAHPWIQNAKKAPNVPLGDIVRSRLKQFSMMNRFKKKVLRVIAEHLSIQEVEVIKNMFSLMDDDKDGKITYPELKAGLQKVGSQ…
AtCPK11		AT1G35670.1	AtChr1	forward	13205380	13208252	AACAAAGAAAAAGTCTGTTTATCATCTTCTTCTTCTTCAAATCGAGATCGAAGAAGAACCAACAAAAAACCAAAAATGGAGACGAAGCCAAACCCTAGACGTCCTTCAAACACAGTTCTACCATATCAAACACCACGATTAAGAGATCATTACCTTCTGGGAAAAAAGCTAGGCCAAGGCCAATTTGGAACAACCTATCTCTGCACAGAGAAATCAACCTCCGCTAATTACGCCTGCAAATCGATCCCGAAGCGAAAGCTCGTGTGTCGCGAGGATTACGAAGATGTATGGCGTGAGATTCAGATCATGCATCATCTCTCTGAGCATCCAAATGTTGTTAGGATCAAAGGGACTTATGAAGATTCGGTGTTTGTTCATATTGTTATGGAGGTTTGTGAA…	AACAAAGAAAAAGTCTGTTTATCATCTTCTTCTTCTTCAAATCGAGATCGAAGAAGAACCAACAAAAAACCAAAAATGGAGACGAAGCCAAACCCTAGACGTCCTTCAAACACAGTTCTACCATATCAAACACCACGATTAAGAGATCATTACCTTCTGGGAAAAAAGCTAGGCCAAGGCCAATTTGGAACAACCTATCTCTGCACAGAGAAATCAACCTCCGCTAATTACGCCTGCAAATCGATCCCGAAGCGAAAGCTCGTGTGTCGCGAGGATTACGAAGATGTATGGCGTGAGATTCAGATCATGCATCATCTCTCTGAGCATCCAAATGTTGTTAGGATCAAAGGGACTTATGAAGATTCGGTGTTTGTTCATATTGTTATGGAGGTTTGTGAA…	ATGGAGACGAAGCCAAACCCTAGACGTCCTTCAAACACAGTTCTACCATATCAAACACCACGATTAAGAGATCATTACCTTCTGGGAAAAAAGCTAGGCCAAGGCCAATTTGGAACAACCTATCTCTGCACAGAGAAATCAACCTCCGCTAATTACGCCTGCAAATCGATCCCGAAGCGAAAGCTCGTGTGTCGCGAGGATTACGAAGATGTATGGCGTGAGATTCAGATCATGCATCATCTCTCTGAGCATCCAAATGTTGTTAGGATCAAAGGGACTTATGAAGATTCGGTGTTTGTTCATATTGTTATGGAGGTTTGTGAAGGTGGTGAGCTTTTTGATCGGATTGTTTCTAAAGGTCATTTTAGTGAGCGTGAAGCTGTCAAGCTTATTAAGACG…	METKPNPRRPSNTVLPYQTPRLRDHYLLGKKLGQGQFGTTYLCTEKSTSANYACKSIPKRKLVCREDYEDVWREIQIMHHLSEHPNVVRIKGTYEDSVFVHIVMEVCEGGELFDRIVSKGHFSEREAVKLIKTILGVVEACHSLGVMHRDLKPENFLFDSPKDDAKLKATDFGLSVFYKPGQYLYDVVGSPYYVAPEVLKKCYGPEIDVWSAGVILYILLSGVPPFWAETESGIFRQILQGKLDFKSDPWPTISEAAKDLIYKMLERSPKKRISAHEALCHPWIVDEQAAPDKPLDPAVLSRLKQFSQMNKIKKMALRVIAERLSEEEIGGLKELFKMIDTDNSGTITFEELKAGLKRVGSELMESEIKSLMDAADIDNSGTIDYGEFLAATLHMNKME…
AtCPK12		AT5G23580.1	AtChr5	reverse	7950201	7952532	TGCCTTCTCCAAGTCAGTTTCTTTCCTCATTCAACAGTTTCTCTTCTTCTTCCTCTGCTTAAACGAAACCCTCAAAGAAATAAAAAAAAGCTCTCAAGAATGGCGAACAAACCAAGAACCAGATGGGTTCTTCCTTACAAGACCAAAAACGTTGAAGACAATTACTTTCTTGGTCAAGTCCTTGGACAAGGCCAATTCGGAACCACTTTCCTCTGTACCCATAAACAGACAGGTCAAAAGCTTGCCTGCAAATCCATACCCAAAAGGAAGCTCCTTTGTCAAGAAGATTACGACGACGTTCTGAGAGAGATCCAGATAATGCATCACTTGTCTGAATACCCCAACGTTGTCCGTATAGAGAGTGCGTACGAGGACACCAAAAACGTGCATCTTGTGATG…	TGCCTTCTCCAAGTCAGTTTCTTTCCTCATTCAACAGTTTCTCTTCTTCTTCCTCTGCTTAAACGAAACCCTCAAAGAAATAAAAAAAAGCTCTCAAGAATGGCGAACAAACCAAGAACCAGATGGGTTCTTCCTTACAAGACCAAAAACGTTGAAGACAATTACTTTCTTGGTCAAGTCCTTGGACAAGGCCAATTCGGAACCACTTTCCTCTGTACCCATAAACAGACAGGTCAAAAGCTTGCCTGCAAATCCATACCCAAAAGGAAGCTCCTTTGTCAAGAAGATTACGACGACGTTCTGAGAGAGATCCAGATAATGCATCACTTGTCTGAATACCCCAACGTTGTCCGTATAGAGAGTGCGTACGAGGACACCAAAAACGTGCATCTTGTGATG…	ATGGCGAACAAACCAAGAACCAGATGGGTTCTTCCTTACAAGACCAAAAACGTTGAAGACAATTACTTTCTTGGTCAAGTCCTTGGACAAGGCCAATTCGGAACCACTTTCCTCTGTACCCATAAACAGACAGGTCAAAAGCTTGCCTGCAAATCCATACCCAAAAGGAAGCTCCTTTGTCAAGAAGATTACGACGACGTTCTGAGAGAGATCCAGATAATGCATCACTTGTCTGAATACCCCAACGTTGTCCGTATAGAGAGTGCGTACGAGGACACCAAAAACGTGCATCTTGTGATGGAGCTTTGTGAAGGAGGTGAGTTGTTTGATAGAATTGTGAAGAGAGGTCATTACAGTGAAAGAGAAGCTGCTAAGCTTATCAAGACCATTGTTGGGGTT…	MANKPRTRWVLPYKTKNVEDNYFLGQVLGQGQFGTTFLCTHKQTGQKLACKSIPKRKLLCQEDYDDVLREIQIMHHLSEYPNVVRIESAYEDTKNVHLVMELCEGGELFDRIVKRGHYSEREAAKLIKTIVGVVEACHSLGVVHRDLKPENFLFSSSDEDASLKSTDFGLSVFCTPGEAFSELVGSAYYVAPEVLHKHYGPECDVWSAGVILYILLCGFPPFWAESEIGIFRKILQGKLEFEINPWPSISESAKDLIKKMLESNPKKRLTAHQVLCHPWIVDDKVAPDKPLDCAVVSRLKKFSAMNKLKKMALRVIAERLSEEEIGGLKELFKMIDTDKSGTITFEELKDSMRRVGSELMESEIQELLRAADVDESGTIDYGEFLAATIHLNKLEREEN…
AtCPK13		AT3G51850.1	AtChr3	forward	19232466	19235889	TCTCTCTCTCTCGCTACTCTCATCTTCACCGTACGCTTCTTCGATCTACGCTTCTCTCTAGCTATAGCTTCCATTGTCACGATTCCTCCCAAAGCGTAGAATGTGGAACCCTAGATACCTCAAATTCAGCTAGAGATCTATCTACTTTCACCTCTATTACTTTCTACTTCTGAAACCCCTCATCAGAGCTACACACAGTGATGGGAAACTGTTGCAGATCTCCCGCAGCAGTTGCTAGAGAAGACGTGAAATCCAACTATTCCGGCCACGATCACGCCCGCAAAGACGCCGCCGGCGGTAAAAAATCGGCGCCGATTCGAGTTCTAAGCGATGTTCCCAAGGAAAACATCGAGGACCGTTACTTACTCGACAGAGAACTCGGCCGCGGCGAGTTTGGTG…	TCTCTCTCTCTCGCTACTCTCATCTTCACCGTACGCTTCTTCGATCTACGCTTCTCTCTAGCTATAGCTTCCATTGTCACGATTCCTCCCAAAGCGTAGAATGTGGAACCCTAGATACCTCAAATTCAGCTAGAGATCTATCTACTTTCACCTCTATTACTTTCTACTTCTGAAACCCCTCATCAGAGCTACACACAGTGATGGGAAACTGTTGCAGATCTCCCGCAGCAGTTGCTAGAGAAGACGTGAAATCCAACTATTCCGGCCACGATCACGCCCGCAAAGACGCCGCCGGCGGTAAAAAATCGGCGCCGATTCGAGTTCTAAGCGATGTTCCCAAGGAAAACATCGAGGACCGTTACTTACTCGACAGAGAACTCGGCCGCGGCGAGTTTGGTG…	ATGGGAAACTGTTGCAGATCTCCCGCAGCAGTTGCTAGAGAAGACGTGAAATCCAACTATTCCGGCCACGATCACGCCCGCAAAGACGCCGCCGGCGGTAAAAAATCGGCGCCGATTCGAGTTCTAAGCGATGTTCCCAAGGAAAACATCGAGGACCGTTACTTACTCGACAGAGAACTCGGCCGCGGCGAGTTTGGTGTCACTTACCTCTGTATCGAGAGGTCCTCGCGTGACCTACTCGCTTGCAAATCGATCTCCAAGAGGAAGCTTAGAACTGCTGTGGATATTGAAGATGTTAAAAGAGAAGTAGCGATTATGAAGCATTTGCCTAAGAGTTCGAGTATTGTTACTTTGAAAGAAGCTTGTGAGGATGATAATGCTGTGCATTTGGTTATGGAG…	MGNCCRSPAAVAREDVKSNYSGHDHARKDAAGGKKSAPIRVLSDVPKENIEDRYLLDRELGRGEFGVTYLCIERSSRDLLACKSISKRKLRTAVDIEDVKREVAIMKHLPKSSSIVTLKEACEDDNAVHLVMELCEGGELFDRIVARGHYTERAAAGVTKTIVEVVQLCHKHGVIHRDLKPENFLFANKKENSPLKAIDFGLSIFFKPGEKFSEIVGSPYYMAPEVLKRNYGPEIDIWSAGVILYILLCGVPPFWAESEQGVAQAILRGVIDFKREPWPNISETAKNLVRQMLEPDPKRRLTAKQVLEHPWIQNAKKAPNVPLGDVVKSRLKQFSVMNRFKRKALRVIAEFLSTEEVEDIKVMFNKMDTDNDGIVSIEELKAGLRDFSTQLAESEVQML…
AtCPK14		AT2G41860.1	AtChr2	reverse	17467343	17469786	ATGGGAAATTGTTGTGGAACGGCTGGATCGTTGATTCAAGATAAGCAGAAGAAAGGTTTTAAATTGCCAAATCCTTTCTCAAACGAGTACGGCAACCACCACGATGGCCTTAAGCTTATCGTGTTGAAGGAACCAACGGGTCATGAGATCAAGCAGAAATATAAATTAGGTCGTGAGTTAGGTCGAGGAGAGTTCGGTGTGACGTATCTGTGCACCGAGATCGAGACCGGAGAGATTTTCGCATGCAAATCAATCTTAAAGAAGAAGCTGAAAACGTCGATTGATATAGAGGACGTTAAGAGAGAAGTTGAGATCATGAGGCAAATGCCTGAACATCCTAATATTGTTACTTTGAAAGAGACTTATGAGGATGATAAAGCTGTGCATTTGGTTATGGAG…	ATGGGAAATTGTTGTGGAACGGCTGGATCGTTGATTCAAGATAAGCAGAAGAAAGGTTTTAAATTGCCAAATCCTTTCTCAAACGAGTACGGCAACCACCACGATGGCCTTAAGCTTATCGTGTTGAAGGAACCAACGGGTCATGAGATCAAGCAGAAATATAAATTAGGTCGTGAGTTAGGTCGAGGAGAGTTCGGTGTGACGTATCTGTGCACCGAGATCGAGACCGGAGAGATTTTCGCATGCAAATCAATCTTAAAGAAGAAGCTGAAAACGTCGATTGATATAGAGGACGTTAAGAGAGAAGTTGAGATCATGAGGCAAATGCCTGAACATCCTAATATTGTTACTTTGAAAGAGACTTATGAGGATGATAAAGCTGTGCATTTGGTTATGGAG…	ATGGGAAATTGTTGTGGAACGGCTGGATCGTTGATTCAAGATAAGCAGAAGAAAGGTTTTAAATTGCCAAATCCTTTCTCAAACGAGTACGGCAACCACCACGATGGCCTTAAGCTTATCGTGTTGAAGGAACCAACGGGTCATGAGATCAAGCAGAAATATAAATTAGGTCGTGAGTTAGGTCGAGGAGAGTTCGGTGTGACGTATCTGTGCACCGAGATCGAGACCGGAGAGATTTTCGCATGCAAATCAATCTTAAAGAAGAAGCTGAAAACGTCGATTGATATAGAGGACGTTAAGAGAGAAGTTGAGATCATGAGGCAAATGCCTGAACATCCTAATATTGTTACTTTGAAAGAGACTTATGAGGATGATAAAGCTGTGCATTTGGTTATGGAG…	MGNCCGTAGSLIQDKQKKGFKLPNPFSNEYGNHHDGLKLIVLKEPTGHEIKQKYKLGRELGRGEFGVTYLCTEIETGEIFACKSILKKKLKTSIDIEDVKREVEIMRQMPEHPNIVTLKETYEDDKAVHLVMELCEGGELFDRIVARGHYTERAAASVIKTIIEVVQMCHKHGVMHRDLKPENFLFANKKETASLKAIDFGLSVFFKPGERFNEIVGSPYYMAPEVLRRSYGQEIDIWSAGVILYILLCGVPPFWAETEHGVAKAILKSVIDFKRDPWPKVSDNAKDLIKKMLHPDPRRRLTAQQVLDHPWIQNGKNASNVSLGETVRARLKQFSVMNKLKKRALRVIAEHLSVEETSCIKERFQVMDTSNRGKITITELGIGLQKLGIVVPQDDIQIL…
AtCPK15		AT4G21940.1	AtChr4	forward	11640801	11643762	CCTCTAACCGAGAACACAAGAAATTCTATTAAAAAAAACCTAAAAATGGGTTGCTTTAGCAGCAAACACCGAAACACAGAGAGTGATATCATCAATGGCAGCGTACAGAGCTCAATTCCGACAAATCAACCTGAAAACCATGTCTCTCGTGATGTTCTCAAGCCTCAGAAACCTCCTTCTCCTCAAATTCCGACAACAACCCAATCAAATCATCATCACCAACAAGAATCCAAACCCGTTAATCAGCAAATCGAAAAGAAGCACGTTCTAACACAACCATTGAAACCAATCGTTTTTAGAGAAACAGAGACAATTCTAGGCAAACCCTTTGAAGAAATAAGGAAACTTTACACGTTAGGTAAAGAATTAGGTCGAGGCCAATTTGGTATAACCTACACT…	AACCGAGAACACAAGAAATTCTATTAAAAAAAACCTAAAAATGGGTTGCTTTAGCAGCAAACACCGAAACACAGAGAGTGATATCATCAATGGCAGCGTACAGAGCTCAATTCCGACAAATCAACCTGAAAACCATGTCTCTCGTGATGTTCTCAAGCCTCAGAAACCTCCTTCTCCTCAAATTCCGACAACAACCCAATCAAATCATCATCACCAACAAGAATCCAAACCCGTTAATCAGCAAATCGAAAAGAAGCACGTTCTAACACAACCATTGAAACCAATCGTTTTTAGAGAAACAGAGACAATTCTAGGCAAACCCTTTGAAGAAATAAGGAAACTTTACACGTTAGGTAAAGAATTAGGTCGAGGCCAATTTGGTATAACCTACACTTGCAA…	ATGGGTTGCTTTAGCAGCAAACACCGAAACACAGAGAGTGATATCATCAATGGCAGCGTACAGAGCTCAATTCCGACAAATCAACCTGAAAACCATGTCTCTCGTGATGTTCTCAAGCCTCAGAAACCTCCTTCTCCTCAAATTCCGACAACAACCCAATCAAATCATCATCACCAACAAGAATCCAAACCCGTTAATCAGCAAATCGAAAAGAAGCACGTTCTAACACAACCATTGAAACCAATCGTTTTTAGAGAAACAGAGACAATTCTAGGCAAACCCTTTGAAGAAATAAGGAAACTTTACACGTTAGGTAAAGAATTAGGTCGAGGCCAATTTGGTATAACCTACACTTGCAAAGAGAATTCAACAGGCAACACATACGCTTGCAAATCAATA…	MGCFSSKHRNTESDIINGSVQSSIPTNQPENHVSRDVLKPQKPPSPQIPTTTQSNHHHQQESKPVNQQIEKKHVLTQPLKPIVFRETETILGKPFEEIRKLYTLGKELGRGQFGITYTCKENSTGNTYACKSILKRKLTRKQDIDDVKREIQIMQYLSGQENIVEIKGAYEDRQSIHLVMELCGGSELFDRIIAQGHYSEKAAAGVIRSVLNVVQICHFMGVIHRDLKPENFLLASTDENAMLKATDFGLSVFIEEGKVYRDIVGSAYYVAPEVLRRSYGKEIDIWSAGIILYILLCGVPPFWSETEKGIFNEIIKGEIDFDSQPWPSISESAKDLVRKLLTKDPKQRISAAQALEHPWIRGGEAPDKPIDSAVLSRMKQFRAMNKLKKLALKVIAESL…
AtCPK16		AT2G17890.1	AtChr2	reverse	7769884	7772627	ATGGGTCTCTGTTTCTCCTCCGCCGCCAAATCCTCCGGCCACAACCGCAGTAGCCGGAATCCCCACCCACATCCTCCTCTCACGGTTGTTAAATCCAGACCACCGCGATCTCCATGTTCCTTCATGGCCGTTACGATCCAAAAGGATCATAGAACGCAACCGCGACGCAATGCAACGGCTAAGAAAACGCCGACGCGGCATACGCCACCGCACGGGAAAGTGAGAGAGAAAGTTATAAGCAATAACGGTAGGAGACATGGAGAAACGATCCCCTACGGTAAGCGTGTAGATTTTGGGTACGCTAAAGATTTTGATCACCGTTACACCATTGGAAAATTGCTTGGACATGGTCAATTTGGTTATACATATGTCGCTACCGATAAAAAAACCGGTGATCGT…	ATGGGTCTCTGTTTCTCCTCCGCCGCCAAATCCTCCGGCCACAACCGCAGTAGCCGGAATCCCCACCCACATCCTCCTCTCACGGTTGTTAAATCCAGACCACCGCGATCTCCATGTTCCTTCATGGCCGTTACGATCCAAAAGGATCATAGAACGCAACCGCGACGCAATGCAACGGCTAAGAAAACGCCGACGCGGCATACGCCACCGCACGGGAAAGTGAGAGAGAAAGTTATAAGCAATAACGGTAGGAGACATGGAGAAACGATCCCCTACGGTAAGCGTGTAGATTTTGGGTACGCTAAAGATTTTGATCACCGTTACACCATTGGAAAATTGCTTGGACATGGTCAATTTGGTTATACATATGTCGCTACCGATAAAAAAACCGGTGATCGT…	ATGGGTCTCTGTTTCTCCTCCGCCGCCAAATCCTCCGGCCACAACCGCAGTAGCCGGAATCCCCACCCACATCCTCCTCTCACGGTTGTTAAATCCAGACCACCGCGATCTCCATGTTCCTTCATGGCCGTTACGATCCAAAAGGATCATAGAACGCAACCGCGACGCAATGCAACGGCTAAGAAAACGCCGACGCGGCATACGCCACCGCACGGGAAAGTGAGAGAGAAAGTTATAAGCAATAACGGTAGGAGACATGGAGAAACGATCCCCTACGGTAAGCGTGTAGATTTTGGGTACGCTAAAGATTTTGATCACCGTTACACCATTGGAAAATTGCTTGGACATGGTCAATTTGGTTATACATATGTCGCTACCGATAAAAAAACCGGTGATCGT…	MGLCFSSAAKSSGHNRSSRNPHPHPPLTVVKSRPPRSPCSFMAVTIQKDHRTQPRRNATAKKTPTRHTPPHGKVREKVISNNGRRHGETIPYGKRVDFGYAKDFDHRYTIGKLLGHGQFGYTYVATDKKTGDRVAVKKIDKAKMTIPIAVEDVKREVKILQALTGHENVVRFYNAFEDKNSVYIVMELCEGGELLDRILARKDSRYSERDAAVVVRQMLKVAAECHLRGLVHRDMKPENFLFKSTEEDSPLKATDFGLSDFIKPGKKFHDIVGSAYYVAPEVLKRRSGPESDVWSIGVISYILLCGRRPFWDKTEDGIFKEVLKNKPDFRRKPWPTISNSAKDFVKKLLVKDPRARLTAAQALSHPWVREGGDASEIPIDISVLNNMRQFVKFSRLKQF…
AtCPK17		AT5G12180.1	AtChr5	forward	3937023	3939596	AAAGCAAAAAAAGTAAGAGAAGAAAAACACAAAAAAAAATAAAACCTTTCTATTTCTCTTCCTCCTTTGAGCTTTGACCTCTCCTCCATCTCCCCCACCCTTTTATGCAACAATGGGAAATTGTTGCTCTCACGGACGGGACTCAGCCGATAACGGAGACGCATTGGAAAACGGAGCTTCCGCTTCAAATGCTGCCAATTCGACTGGTCCAACCGCGGAAGCTTCTGTACCACAATCAAAACATGCACCTCCTTCTCCTCCTCCTGCAACCAAACAAGGCCCTATAGGCCCTGTCTTAGGTCGACCCATGGAAGATGTAAAAGCTTCATATTCTTTAGGGAAAGAGCTCGGGCGAGGCCAATTTGGTGTCACACACCTCTGCACACAGAAGGCAACAGG…	AAAGCAAAAAAAGTAAGAGAAGAAAAACACAAAAAAAAATAAAACCTTTCTATTTCTCTTCCTCCTTTGAGCTTTGACCTCTCCTCCATCTCCCCCACCCTTTTATGCAACAATGGGAAATTGTTGCTCTCACGGACGGGACTCAGCCGATAACGGAGACGCATTGGAAAACGGAGCTTCCGCTTCAAATGCTGCCAATTCGACTGGTCCAACCGCGGAAGCTTCTGTACCACAATCAAAACATGCACCTCCTTCTCCTCCTCCTGCAACCAAACAAGGCCCTATAGGCCCTGTCTTAGGTCGACCCATGGAAGATGTAAAAGCTTCATATTCTTTAGGGAAAGAGCTCGGGCGAGGCCAATTTGGTGTCACACACCTCTGCACACAGAAGGCAACAGG…	ATGGGAAATTGTTGCTCTCACGGACGGGACTCAGCCGATAACGGAGACGCATTGGAAAACGGAGCTTCCGCTTCAAATGCTGCCAATTCGACTGGTCCAACCGCGGAAGCTTCTGTACCACAATCAAAACATGCACCTCCTTCTCCTCCTCCTGCAACCAAACAAGGCCCTATAGGCCCTGTCTTAGGTCGACCCATGGAAGATGTAAAAGCTTCATATTCTTTAGGGAAAGAGCTCGGGCGAGGCCAATTTGGTGTCACACACCTCTGCACACAGAAGGCAACAGGTCATCAATTTGCTTGCAAGACGATTGCAAAAAGAAAGCTTGTAAACAAGGAAGACATTGAGGATGTAAGAAGAGAAGTGCAGATAATGCATCACTTGACTGGTCAACCAAAC…	MGNCCSHGRDSADNGDALENGASASNAANSTGPTAEASVPQSKHAPPSPPPATKQGPIGPVLGRPMEDVKASYSLGKELGRGQFGVTHLCTQKATGHQFACKTIAKRKLVNKEDIEDVRREVQIMHHLTGQPNIVELKGAYEDKHSVHLVMELCAGGELFDRIIAKGHYSERAAASLLRTIVQIVHTCHSMGVIHRDLKPENFLLLNKDENSPLKATDFGLSVFYKPGEVFKDIVGSAYYIAPEVLKRKYGPEADIWSIGVMLYILLCGVPPFWAESENGIFNAILRGHVDFSSDPWPSISPQAKDLVKKMLNSDPKQRLTAAQVLNHPWIKEDGEAPDVPLDNAVMSRLKQFKAMNNFKKVALRVIAGCLSEEEIMGLKEMFKGMDTDSSGTITLEEL…
AtCPK18		AT4G36070.1	AtChr4	reverse	17056722	17059627	CTCCATTAGAGTAGGGACCCAACAAGCATCACATGGGTCTCTGTTTCTCGTCTCCTAAAGCCACCAGACGTGGCACCGGTAGTCGGAACCCTAATCCTGATTCTCCGACGCAGGGGAAGGCGAGTGAGAAGGTTAGTAATAAAAACAAGAAGAATACGAAGAAGATCCAATTGAGGCACCAAGGAGGGATCCCGTACGGTAAACGCATCGATTTTGGGTACGCTAAGGATTTCGATAACCGATACACCATTGGGAAATTGCTCGGACATGGCCAGTTTGGCTTTACCTACGTCGCCACCGATAACAACAATGGCAATCGCGTTGCAGTCAAGAGAATCGACAAGGCCAAGGTAAAAATATCATCTATTGTTGTTATTTGCTTTTAGCTAAAGATCCTTA…	ATGGGTCTCTGTTTCTCGTCTCCTAAAGCCACCAGACGTGGCACCGGTAGTCGGAACCCTAATCCTGATTCTCCGACGCAGGGGAAGGCGAGTGAGAAGGTTAGTAATAAAAACAAGAAGAATACGAAGAAGATCCAATTGAGGCACCAAGGAGGGATCCCGTACGGTAAACGCATCGATTTTGGGTACGCTAAGGATTTCGATAACCGATACACCATTGGGAAATTGCTCGGACATGGCCAGTTTGGCTTTACCTACGTCGCCACCGATAACAACAATGGCAATCGCGTTGCAGTCAAGAGAATCGACAAGGCCAAGATGACTCAACCGATTGAAGTGGAAGATGTGAAGCGAGAGGTTAAGATACTACAAGCTTTAGGTGGGCATGAGAATGTGGTA…	ATGGGTCTCTGTTTCTCGTCTCCTAAAGCCACCAGACGTGGCACCGGTAGTCGGAACCCTAATCCTGATTCTCCGACGCAGGGGAAGGCGAGTGAGAAGGTTAGTAATAAAAACAAGAAGAATACGAAGAAGATCCAATTGAGGCACCAAGGAGGGATCCCGTACGGTAAACGCATCGATTTTGGGTACGCTAAGGATTTCGATAACCGATACACCATTGGGAAATTGCTCGGACATGGCCAGTTTGGCTTTACCTACGTCGCCACCGATAACAACAATGGCAATCGCGTTGCAGTCAAGAGAATCGACAAGGCCAAGATGACTCAACCGATTGAAGTGGAAGATGTGAAGCGAGAGGTTAAGATACTACAAGCTTTAGGTGGGCATGAGAATGTGGTA…	MGLCFSSPKATRRGTGSRNPNPDSPTQGKASEKVSNKNKKNTKKIQLRHQGGIPYGKRIDFGYAKDFDNRYTIGKLLGHGQFGFTYVATDNNNGNRVAVKRIDKAKMTQPIEVEDVKREVKILQALGGHENVVGFHNAFEDKTYIYIVMELCDGGELLDRILAKKDSRYTEKDAAVVVRQMLKVAAECHLRGLVHRDMKPENFLFKSTEEGSSLKATDFGLSDFIKPGVKFQDIVGSAYYVAPEVLKRRSGPESDVWSIGVITYILLCGRRPFWDKTQDGIFNEVMRKKPDFREVPWPTISNGAKDFVKKLLVKEPRARLTAAQALSHSWVKEGGEASEVPIDISVLNNMRQFVKFSRLKQIALRALAKTINEDELDDLRDQFDAIDIDKNGSISLEEM…
AtCPK19		AT1G61950.1	AtChr1	forward	22899416	22901946	ATGGGATGTCTCTGCATCAATCTGAAGAAGAAGGTCAAGAAACCAACACCAGACATCAGTGGAGAACAAAACACAGAGGTAAAGAGCAGAGAAATAACACCAAAAGAACAACCTCGTCAAAGACAACCAGCTCCAAGAGCCAAGTTCCAGATTGTGGTGCAACCTCATAAACTCCCACTTCCACTTCCTCAGCCTCAAGAAAAACAAAAGCTGATCAATCATCAAAAACAGAGCACCCTGCAACAACCAGAACCGATCTTAGGGAGACCATTTGAAGATATTAAGGAGAAGTATAGTCTTGGTCGCGAATTAGGTCGTGGCCAATTCGGTATAACGTATATATGTACAGAGATTTCATCAGGCAAGAACTTTGCTTGTAAATCCATCTTGAAGAGAAAG…	ATGGGATGTCTCTGCATCAATCTGAAGAAGAAGGTCAAGAAACCAACACCAGACATCAGTGGAGAACAAAACACAGAGGTAAAGAGCAGAGAAATAACACCAAAAGAACAACCTCGTCAAAGACAACCAGCTCCAAGAGCCAAGTTCCAGATTGTGGTGCAACCTCATAAACTCCCACTTCCACTTCCTCAGCCTCAAGAAAAACAAAAGCTGATCAATCATCAAAAACAGAGCACCCTGCAACAACCAGAACCGATCTTAGGGAGACCATTTGAAGATATTAAGGAGAAGTATAGTCTTGGTCGCGAATTAGGTCGTGGCCAATTCGGTATAACGTATATATGTACAGAGATTTCATCAGGCAAGAACTTTGCTTGTAAATCCATCTTGAAGAGAAAG…	ATGGGATGTCTCTGCATCAATCTGAAGAAGAAGGTCAAGAAACCAACACCAGACATCAGTGGAGAACAAAACACAGAGGTAAAGAGCAGAGAAATAACACCAAAAGAACAACCTCGTCAAAGACAACCAGCTCCAAGAGCCAAGTTCCAGATTGTGGTGCAACCTCATAAACTCCCACTTCCACTTCCTCAGCCTCAAGAAAAACAAAAGCTGATCAATCATCAAAAACAGAGCACCCTGCAACAACCAGAACCGATCTTAGGGAGACCATTTGAAGATATTAAGGAGAAGTATAGTCTTGGTCGCGAATTAGGTCGTGGCCAATTCGGTATAACGTATATATGTACAGAGATTTCATCAGGCAAGAACTTTGCTTGTAAATCCATCTTGAAGAGAAAG…	MGCLCINLKKKVKKPTPDISGEQNTEVKSREITPKEQPRQRQPAPRAKFQIVVQPHKLPLPLPQPQEKQKLINHQKQSTLQQPEPILGRPFEDIKEKYSLGRELGRGQFGITYICTEISSGKNFACKSILKRKLIRTKDREDVRREIQIMHYLSGQPNIVEIKGAYEDRQSVHLVMELCEGGELFDKITKRGHYSEKAAAEIIRSVVKVVQICHFMGVIHRDLKPENFLLSSKDEASSMLKATDFGVSVFIEEGKVYEDIVGSAYYVAPEVLKRNYGKAIDIWSAGVILYILLCGNPPFWAETDKGIFEEILRGEIDFESEPWPSISESAKDLVRNMLKYDPKKRFTAAQVLEHPWIREGGEASDKPIDSAVLSRMKQLRAMNKLKKLAFKFIAQNLKE…
AtCPK20		AT2G38910.1	AtChr2	reverse	16245213	16247483	ATGGGAAACACATGCGTGGGTCCGAATCTGAACCCTAATGGATTCCTTCAATCCGTTAGTGCTGCCGTGTGGCGGAATCAGAAACCAGACGATAGCATTAAGAGCAGCAAGGACGAGAGCAGTCGAAAAAAGAACGATAAAAGCGTTAATGGCGACGACAGTAACGGTCACGTTTCCTCCACCGTGGATCCAGCACCATCCACGTTGCCAACACCGAGCACACCACCACCTCCGGTGAAAATGGCCAACGAAGAACCACCACCAAAACCTATCACAGAGAACAAAGAAGATCCGAATTCGAAACCGCAGAAGAAAGAAGCGCACATGAAACGTATGGCAAGCGCAGGTCTACAAATAGACTCAGTTCTTGGGAGAAAAACAGAGAATCTCAAAGATATA…	ATGGGAAACACATGCGTGGGTCCGAATCTGAACCCTAATGGATTCCTTCAATCCGTTAGTGCTGCCGTGTGGCGGAATCAGAAACCAGACGATAGCATTAAGAGCAGCAAGGACGAGAGCAGTCGAAAAAAGAACGATAAAAGCGTTAATGGCGACGACAGTAACGGTCACGTTTCCTCCACCGTGGATCCAGCACCATCCACGTTGCCAACACCGAGCACACCACCACCTCCGGTGAAAATGGCCAACGAAGAACCACCACCAAAACCTATCACAGAGAACAAAGAAGATCCGAATTCGAAACCGCAGAAGAAAGAAGCGCACATGAAACGTATGGCAAGCGCAGGTCTACAAATAGACTCAGTTCTTGGGAGAAAAACAGAGAATCTCAAAGATATA…	ATGGGAAACACATGCGTGGGTCCGAATCTGAACCCTAATGGATTCCTTCAATCCGTTAGTGCTGCCGTGTGGCGGAATCAGAAACCAGACGATAGCATTAAGAGCAGCAAGGACGAGAGCAGTCGAAAAAAGAACGATAAAAGCGTTAATGGCGACGACAGTAACGGTCACGTTTCCTCCACCGTGGATCCAGCACCATCCACGTTGCCAACACCGAGCACACCACCACCTCCGGTGAAAATGGCCAACGAAGAACCACCACCAAAACCTATCACAGAGAACAAAGAAGATCCGAATTCGAAACCGCAGAAGAAAGAAGCGCACATGAAACGTATGGCAAGCGCAGGTCTACAAATAGACTCAGTTCTTGGGAGAAAAACAGAGAATCTCAAAGATATA…	MGNTCVGPNLNPNGFLQSVSAAVWRNQKPDDSIKSSKDESSRKKNDKSVNGDDSNGHVSSTVDPAPSTLPTPSTPPPPVKMANEEPPPKPITENKEDPNSKPQKKEAHMKRMASAGLQIDSVLGRKTENLKDIYSVGRKLGQGQFGTTFLCVDKKTGKEFACKTIAKRKLTTPEDVEDVRREIQIMHHLSGHPNVIQIVGAYEDAVAVHVVMEICAGGELFDRIIQRGHYTEKKAAELARIIVGVIEACHSLGVMHRDLKPENFLFVSGDEEAALKTIDFGLSVFFKPGETFTDVVGSPYYVAPEVLRKHYSHECDVWSAGVIIYILLSGVPPFWDETEQGIFEQVLKGDLDFISEPWPSVSESAKDLVRRMLIRDPKKRMTTHEVLCHPWARVDGVAL…
AtCPK21		AT4G04720.1	AtChr4	reverse	2394457	2397759	AATTCCAATTCCAGTCAAACAAAACCTTCACAACTCAATTATTCTTCCGATTTTGGTTTCTCTCTTCCAATCATCCTTCAAGCTCATCTTTTTCTTCTACCCAATAACGAAAGTCTCCTCCTTTACTAATGGGTTGCTTCAGCAGTAAACACCGGAAAACTCAAAACGACGGCGGAGAAAAATCAATCCCGATCAATCCAGTTCAAACCCATGTAGTCCCCGAGCATCGTAAACCTCAAACCCCAACACCAAAACCCATGACTCAACCAATCCATCAGCAGATTTCAACACCGTCTTCAAATCCAGTCTCAGTTCGAGATCCAGATACGATTTTAGGTAAACCATTCGAAGACATCAGGAAATTTTACAGCTTGGGGAAAGAATTAGGTCGAGGTCAAT…	AATTCCAATTCCAGTCAAACAAAACCTTCACAACTCAATTATTCTTCCGATTTTGGTTTCTCTCTTCCAATCATCCTTCAAGCTCATCTTTTTCTTCTACCCAATAACGAAAGTCTCCTCCTTTACTAATGGGTTGCTTCAGCAGTAAACACCGGAAAACTCAAAACGACGGCGGAGAAAAATCAATCCCGATCAATCCAGTTCAAACCCATGTAGTCCCCGAGCATCGTAAACCTCAAACCCCAACACCAAAACCCATGACTCAACCAATCCATCAGCAGATTTCAACACCGTCTTCAAATCCAGTCTCAGTTCGAGATCCAGATACGATTTTAGGTAAACCATTCGAAGACATCAGGAAATTTTACAGCTTGGGGAAAGAATTAGGTCGAGGTCAAT…	ATGGGTTGCTTCAGCAGTAAACACCGGAAAACTCAAAACGACGGCGGAGAAAAATCAATCCCGATCAATCCAGTTCAAACCCATGTAGTCCCCGAGCATCGTAAACCTCAAACCCCAACACCAAAACCCATGACTCAACCAATCCATCAGCAGATTTCAACACCGTCTTCAAATCCAGTCTCAGTTCGAGATCCAGATACGATTTTAGGTAAACCATTCGAAGACATCAGGAAATTTTACAGCTTGGGGAAAGAATTAGGTCGAGGTCAATTTGGGATTACGTATATGTGTAAAGAGATTGGTACTGGTAACACTTATGCTTGCAAATCGATTCTTAAGAGGAAGCTAATTAGTAAGCAAGATAAAGAAGATGTGAAGAGAGAGATTCAGATAATGCAG…	MGCFSSKHRKTQNDGGEKSIPINPVQTHVVPEHRKPQTPTPKPMTQPIHQQISTPSSNPVSVRDPDTILGKPFEDIRKFYSLGKELGRGQFGITYMCKEIGTGNTYACKSILKRKLISKQDKEDVKREIQIMQYLSGQPNIVEIKGAYEDRQSIHLVMELCAGGELFDRIIAQGHYSERAAAGIIRSIVNVVQICHFMGVVHRDLKPENFLLSSKEENAMLKATDFGLSVFIEEGKVYRDIVGSAYYVAPEVLRRSYGKEIDIWSAGVILYILLSGVPPFWAENEKGIFDEVIKGEIDFVSEPWPSISESAKDLVRKMLTKDPKRRITAAQVLEHPWIKGGEAPDKPIDSAVLSRMKQFRAMNKLKKLALKVIAESLSEEEIKGLKTMFANIDTDKSGT…
AtCPK22		AT4G04710.1	AtChr4	reverse	2389597	2392887	ATGGGTAATTGCTGCGGAAGTAAACCCCTAACAGCTTCTGATATCGTCTCGGATCAAAAGCAAGAGACGATTCTTGGGAAGCCATTGGAAGATATCAAGAAGCACTATAGCTTCGGTGACGAACTAGGCAAAGGTAATTTCGGAACAACATACTTGTGCAAAGAGAATTCAACAGGAAAGAGTTACGCTTGCAAATCCATACCTAAGAGAACTCTAAGCAGCGAAGAAGAAAAAGAAGCTGTGAAGACAGAGATTCAAATCATGGATCATGTTTCAGGACAGCCTAACATCGTACAGATCAAAGGTTCCTACGAAGATAATAATTCTATACACATTGTAATGGAATTGTGTGGTGGTGGTGAGTTATTCGACAAGATCGATGCTTTGGTCAAGTCTCAT…	ATGGGTAATTGCTGCGGAAGTAAACCCCTAACAGCTTCTGATATCGTCTCGGATCAAAAGCAAGAGACGATTCTTGGGAAGCCATTGGAAGATATCAAGAAGCACTATAGCTTCGGTGACGAACTAGGCAAAGGAAAGAGTTACGCTTGCAAATCCATACCTAAGAGAACTCTAAGCAGCGAAGAAGAAAAAGAAGCTGTGAAGACAGAGATTCAAATCATGGATCATGTTTCAGGACAGCCTAACATCGTACAGATCAAAGGTTCCTACGAAGATAATAATTCTATACACATTGTAATGGAATTGTGTGGTGGTGGTGAGTTATTCGACAAGATCGATGCTTTGGTCAAGTCTCATAGCTATTACTCTGAGAAAGATGCTGCTGGAATCTTTAGGTCT…	ATGGGTAATTGCTGCGGAAGTAAACCCCTAACAGCTTCTGATATCGTCTCGGATCAAAAGCAAGAGACGATTCTTGGGAAGCCATTGGAAGATATCAAGAAGCACTATAGCTTCGGTGACGAACTAGGCAAAGGAAAGAGTTACGCTTGCAAATCCATACCTAAGAGAACTCTAAGCAGCGAAGAAGAAAAAGAAGCTGTGAAGACAGAGATTCAAATCATGGATCATGTTTCAGGACAGCCTAACATCGTACAGATCAAAGGTTCCTACGAAGATAATAATTCTATACACATTGTAATGGAATTGTGTGGTGGTGGTGAGTTATTCGACAAGATCGATGCTTTGGTCAAGTCTCATAGCTATTACTCTGAGAAAGATGCTGCTGGAATCTTTAGGTCT…	MGNCCGSKPLTASDIVSDQKQETILGKPLEDIKKHYSFGDELGKGKSYACKSIPKRTLSSEEEKEAVKTEIQIMDHVSGQPNIVQIKGSYEDNNSIHIVMELCGGGELFDKIDALVKSHSYYSEKDAAGIFRSIVNAVKICHSLDVVHRDLKPENFLFSSKDENAMLKAIDFGCSVYIKEGKTFERVVGSKYYIAPEVLEGSYGKEIDIWSAGVILYILLSGVPPFQTGIESIIVSTLCIVDAEIKECRLDFESQPWPLISFKAKHLIGKMLTKKPKERISAADVLEHPWMKSEAPDKPIDNVVLSRMKQFRAMNKLKKLALKVIAEGLSEEEIKGLKTMFENMDMDKSGSITYEELKMGLNRHGSKLSETEVKQLMEAVSADVDGNGTIDYIEFISAT…
AtCPK23		AT4G04740.1	AtChr4	reverse	2403608	2408737	AATTCTAAGGCCCAATTAAGGCCTCCAGAGCAGCCCAATCTGAGATCTCGATATATTTTTTCCGGTATATGAAAAAAAAGTCCAAAATCCAGCTCAAAATTCAAATCTTTCAAAAATTTCTTACAGTTCGAGTCAAACATATACAATAATACAAACCACAAATGTGTTCTCAATCAAATTCCTCCAAGTTTATCTTCTTCTTCAATCCAAGAAGAAAGTCTACGAAAAGTCTCCTCCTTTACTAATGGGTTGTTTCAGCAGTAAACACCGGAAAACTCAAAACGACGGCGGCGGAGAAAGATCAATTCCGATAATTCCAGTTCAAACCCATATCGTTGATCAAGTCCCCGATCATCGTAAACCTCAAATCCCATCACCATCGATACCCATCTCAGTTCG…	AATTCTAAGGCCCAATTAAGGCCTCCAGAGCAGCCCAATCTGAGATCTCGATATATTTTTTCCGGTATATGAAAAAAAAGTCCAAAATCCAGCTCAAAATTCAAATCTTTCAAAAATTTCTTACAGTTCGAGTCAAACATATACAATAATACAAACCACAAATGTGTTCTCAATCAAATTCCTCCAAGTTTATCTTCTTCTTCAATCCAAGAAGAAAGTCTACGAAAAGTCTCCTCCTTTACTAATGGGTTGTTTCAGCAGTAAACACCGGAAAACTCAAAACGACGGCGGCGGAGAAAGATCAATTCCGATAATTCCAGTTCAAACCCATATCGTTGATCAAGTCCCCGATCATCGTAAACCTCAAATCCCATCACCATCGATACCCATCTCAGTTCG…	ATGGGTTGTTTCAGCAGTAAACACCGGAAAACTCAAAACGACGGCGGCGGAGAAAGATCAATTCCGATAATTCCAGTTCAAACCCATATCGTTGATCAAGTCCCCGATCATCGTAAACCTCAAATCCCATCACCATCGATACCCATCTCAGTTCGAGATCCAGAGACGATTTTAGGTAAACCATTCGAAGACATCAGGAAATTTTACAGCTTGGGGAGAGAATTAGGTCGAGGTGGTTTAGGGATTACGTATATGTGCAAAGAGATTGGGACTGGGAACATTTATGCTTGCAAATCGATTCTCAAGAGGAAGCTAATTAGTGAGCTGGGTAGAGAAGATGTGAAGACAGAGATTCAGATCATGCAGCATTTGTCTGGACAACCAAACGTTGTTGAGATC…	MGCFSSKHRKTQNDGGGERSIPIIPVQTHIVDQVPDHRKPQIPSPSIPISVRDPETILGKPFEDIRKFYSLGRELGRGGLGITYMCKEIGTGNIYACKSILKRKLISELGREDVKTEIQIMQHLSGQPNVVEIKGSYEDRHSVHLVMELCAGGELFDRIIAQGHYSERAAAGTIKSIVDVVQICHLNGVIHRDLKPENFLFSSKEENAMLKVTDFGLSAFIEEGKIYKDVVGSPYYVAPEVLRQSYGKEIDIWSAGVILYILLCGVPPFWADNEEGVFVEILKCKIDFVREPWPSISDSAKDLVEKMLTEDPKRRITAAQVLEHPWIKGGEAPEKPIDSTVLSRMKQFRAMNKLKKLALKVSAVSLSEEEIKGLKTLFANMDTNRSGTITYEQLQTGLS…
AtCPK24		AT2G31500.1	AtChr2	forward	13413763	13416536	ACAACAGATTAACAAATAGAAAACGAAGCACAAAAGATATCAGAAGAAGAGAGAAGTCTCCTCCCAAAAAAACCAAAAAAAAAAAAAAAAAGAGAAAGAAAAGAACTCGAGTGCAAAAAGCTTCTCTCTTCCTTCCCATGGGGTGCATTTGAACTAATCTCCTCCTTGAAATCGCTTGATTGATTGTTATAAATCGATTAATCGATTCAAACCGTTGGATATTATTCCAAAACAACCCAAAAAGAGAATCCCATGGGAAGTTGTGTTTCGTCGCCATTGAAAGGCTCTCCTTTTGGAAAGAGACCGGTAAGAAGGCGACACAGTAGTAATAGCAGAACATCCTCTGTTCCTCGTTTCGATTCTTCAACTAATCTTTCCCGGAGATTGATTTTCCAGCCA…	ACAACAGATTAACAAATAGAAAACGAAGCACAAAAGATATCAGAAGAAGAGAGAAGTCTCCTCCCAAAAAAACCAAAAAAAAAAAAAAAAAGAGAAAGAAAAGAACTCGAGTGCAAAAAGCTTCTCTCTTCCTTCCCATGGGGTGCATTTGAACTAATCTCCTCCTTGAAATCGCTTGATTGATTGTTATAAATCGATTAATCGATTCAAACCGTTGGATATTATTCCAAAACAACCCAAAAAGAGAATCCCATGGGAAGTTGTGTTTCGTCGCCATTGAAAGGCTCTCCTTTTGGAAAGAGACCGGTAAGAAGGCGACACAGTAGTAATAGCAGAACATCCTCTGTTCCTCGTTTCGATTCTTCAACTAATCTTTCCCGGAGATTGATTTTCCAGCCA…	ATGGGAAGTTGTGTTTCGTCGCCATTGAAAGGCTCTCCTTTTGGAAAGAGACCGGTAAGAAGGCGACACAGTAGTAATAGCAGAACATCCTCTGTTCCTCGTTTCGATTCTTCAACTAATCTTTCCCGGAGATTGATTTTCCAGCCACCAAGCCGCGTTCTCCCCGAGCCTATCGGTGATGGAATTCACCTCAAGTATGATTTGGGAAAAGAACTAGGCCGTGGTGAATTTGGTGTCACTCATGAATGTATCGAGATCAGTACCCGAGAAAGATTTGCGTGTAAGAGGATATCGAAGGAGAAGCTAAGGACGGAGATAGATGTGGAGGATGTGAGAAGAGAGGTTGAGATCATGAGATGTTTACCAAAACATCCTAATATTGTTAGCTTTAAGGAAGCT…	MGSCVSSPLKGSPFGKRPVRRRHSSNSRTSSVPRFDSSTNLSRRLIFQPPSRVLPEPIGDGIHLKYDLGKELGRGEFGVTHECIEISTRERFACKRISKEKLRTEIDVEDVRREVEIMRCLPKHPNIVSFKEAFEDKDAVYLVMEICEGGELFDRIVSRGHYTERAAASVAKTILEVVKVCHEHGVIHRDLKPENFLFSNGTETAQLKAIDFGLSIFFKPAQRFNEIVGSPYYMAPEVLRRNYGPEIDVWSAGVILYILLCGVPPFWAETEEGIAHAIVRGNIDFERDPWPKVSHEAKELVKNMLDANPYSRLTVQEVLEHPWIRNAERAPNVNLGDNVRTKIQQFLLMNRFKKKVLRIVADNLPNEEIAAIVQMFQTMDTDKNGHLTFEELRDGLKKI…
AtCPK25		AT2G35890.1	AtChr2	reverse	15067174	15069136	ATGGGGAATGTATGTGTTCATATGGTCAACAATTGTGTGGATACGAAATCGAATTCATGGGTTCGTCCCACAGATCTCATCATGGATCATCCCTTGAAGCCACAACTCCAGGACAAGCCTCCTCAGCCAATGCTAATGAACAAGGATGATGATAAAACCAAGCTTAATGACACTCATGGTGACCCTAAATTACTTGAGGGGAAAGAGAAACCTGCGCAGAAGCAAACGAGTCAGGGACAAGGAGGAAGGAAGTGCAGTGACGAAGAGTATAAGAAGCGAGCGATTGCGTGTGCTAACAGTAAAAGAAAGGCTCACAATGTGAGGAGACTGATGAGTGCAGGGCTACAAGCAGAGTCAGTGTTGAAGACCAAAACAGGGCATTTGAAGGAATATTATAAC…	ATGGGGAATGTATGTGTTCATATGGTCAACAATTGTGTGGATACGAAATCGAATTCATGGGTTCGTCCCACAGATCTCATCATGGATCATCCCTTGAAGCCACAACTCCAGGACAAGCCTCCTCAGCCAATGCTAATGAACAAGGATGATGATAAAACCAAGCTTAATGACACTCATGGTGACCCTAAATTACTTGAGGGGAAAGAGAAACCTGCGCAGAAGCAAACGAGTCAGGGACAAGGAGGAAGGAAGTGCAGTGACGAAGAGTATAAGAAGCGAGCGATTGCGTGTGCTAACAGTAAAAGAAAGGCTCACAATGTGAGGAGACTGATGAGTGCAGGGCTACAAGCAGAGTCAGTGTTGAAGACCAAAACAGGGCATTTGAAGGAATATTATAAC…	ATGGGGAATGTATGTGTTCATATGGTCAACAATTGTGTGGATACGAAATCGAATTCATGGGTTCGTCCCACAGATCTCATCATGGATCATCCCTTGAAGCCACAACTCCAGGACAAGCCTCCTCAGCCAATGCTAATGAACAAGGATGATGATAAAACCAAGCTTAATGACACTCATGGTGACCCTAAATTACTTGAGGGGAAAGAGAAACCTGCGCAGAAGCAAACGAGTCAGGGACAAGGAGGAAGGAAGTGCAGTGACGAAGAGTATAAGAAGCGAGCGATTGCGTGTGCTAACAGTAAAAGAAAGGCTCACAATGTGAGGAGACTGATGAGTGCAGGGCTACAAGCAGAGTCAGTGTTGAAGACCAAAACAGGGCATTTGAAGGAATATTATAAC…	MGNVCVHMVNNCVDTKSNSWVRPTDLIMDHPLKPQLQDKPPQPMLMNKDDDKTKLNDTHGDPKLLEGKEKPAQKQTSQGQGGRKCSDEEYKKRAIACANSKRKAHNVRRLMSAGLQAESVLKTKTGHLKEYYNLGSKLGHGQFGTTFVCVEKGTGEEYACKSIPKRKLENEEDVEDVRREIEIMKHLLGQPNVISIKGAYEDSVAVHMVMELCRGGELFDRIVERGHYSERKAAHLAKVILGVVQTCHSLGVMHRDLKPENFLFVNDDEDSPLKAIDFGLSMFLKPGENFTDVVGSPYYIAPEVLNKNYGPEADIWSAGVMIYVLLSGSAPFWGETEEEIFNEVLEGELDLTSDPWPQVSESAKDLIRKMLERNPIQRLTAQQVLCHPWIRDEGNAPDT…
AtCPK26		AT4G38230.1	AtChr4	reverse	17928676	17931511	CAACTAGAATCTGAGGCCATGGGATCATTAAAGGTTTGTTCCGATGCGACCAATTGGAGGTCTTGATTTGTCTCATGTGAAGTAGGCCTAAGAAAAGAGCCTTGTGGAGTTCCCCTGCATTTTTAGAATATTCTAATTAAAGAGACAGATCTGTTGATGACTATTAATCAAAGATATCTTCTTCTTTTGTTATTTTTAGTCAGGATGTGGAGACGTTGGCGAGAATATTGCAAAACCATGTTCAACAATGTGTATCATCGGATCTGCACCAATCTGACTTAATTTTCATCCATTCTTATCATCTTTGTCTGGTACACATCCATCTCTTCCTCTAATTCCCCTGTTTTGATGTCTCTCCTTATTATTGCGATTTCTTTATGCTAAATTCGTATAATGTTT…	CTCTAATTCCCCTGTTTTGATGTCTCTCCTTATTATTGCGATTTCTTTATGCTAAATTCGTATAATGTTTCAGATCTTGCTATGGGACTTGCTCTGTTTTCCTCTGATGGCAAACTAATTTGGAAGGGGAGGTGAACTAACTTGCACACAAACTGGCAAAAGACGCCCCCAGGAAGAAGCCACAATGAAGCACAGCGGTGGGAACCAAGCCTGCTATGTTCTTGGTCAAAAGACCCCAAGCATCCGAGATCTCTACTCGTTGGGACACAAACTAGGTCAAGGACAGTTTGGGACGACTTACATGTGCAAAGAGATCTCAACAGGGCGTGAATACGCATGCAAGTCTATAACAAAACGAAAGTTGATATCAAAGGAAGATGTGGAAGACGTACGCAGGGA…	ATGCATAGAGATCTAAAGCCCGAAAATTTCTTGTTGGTTAACAAGGACGACGACTTCTCTCTCAAAGCCATTGATTTTGGGCTTTCCGTGTTCTTCAAACCAGGTCAAATATTCGAGGATGTGGTTGGAAGTCCGTATTATGTTGCTCCTGAGGTTCTGCTCAAGCACTACGGACCCGAGGCTGATGTGTGGACCGCAGGGGTCATACTGTACATATTGGTGAGCGGAGTCCCTCCGTTCTGGGCAGAAACACAGCAAGGGATATTTGATGCAGTGCTGAAGGGACATATTGACTTTGACTCCGACCCTTGGCCCCTAATATCCGACTCTGCAAAAAACTTGATCCGTGGCATGCTATGTTCCCGGCCCTCTGAGCGACTGACAGCTCATCAAGTATTG…	MHRDLKPENFLLVNKDDDFSLKAIDFGLSVFFKPGQIFEDVVGSPYYVAPEVLLKHYGPEADVWTAGVILYILVSGVPPFWAETQQGIFDAVLKGHIDFDSDPWPLISDSAKNLIRGMLCSRPSERLTAHQVLRHPWICENGVAPDRALDPAVLSRLKQFSAMNKLKQMALRVIAESLSEEEIAGLKEMFKAMDTDNSGAITFDELKAGLRRYGSTLKDTEIRDLMEAADIDKSGTIDYGEFIAATIHLNKLEREEHLLSAFRYFDKDGSGYITIDELQHACAEQGMSDVFLEDVIKEVDQDNDGRIDYGEFVAMMQKGIVGRTMRKSINMSIRNNAVSQ
AtCPK27		AT4G04700.1	AtChr4	reverse	2385275	2387986	ATGGGTTGCTTCAGCAGTAAGGAGCTACAACAATCGAAAAGAACCATTCTTGAGAAACCTTTAGTTGACATCACAAAGATTTATATCCTCGGGGAGGAATTGGGTAGAGGTAATTTCGGTCTAACCCGAAAGTGCGTTGAGAAATCTACAGGTAAGACATTCGCCTGCAAAACCATTCTCAAGACAAAGCTAAAGGACGAAGAATGTGAAGAAGACGTGAAGAGAGAGATTCGGATTATGAAGCAATTGTCTGGAGAACCAAACATTGTCGAGTTCAAGAATGCTTACGAGGACAAAGATTCTGTACATATTGTTATGGAATATTGTGGTGGTGGAGAGTTATACGACAAGATCCTAGCTTTGTACGATGTTGGGAAGTCTTACTCGGAGAAAGAAGCT…	ATGGGTTGCTTCAGCAGTAAGGAGCTACAACAATCGAAAAGAACCATTCTTGAGAAACCTTTAGTTGACATCACAAAGATTTATATCCTCGGGGAGGAATTGGGTAGAGGTAATTTCGGTCTAACCCGAAAGTGCGTTGAGAAATCTACAGGTAAGACATTCGCCTGCAAAACCATTCTCAAGACAAAGCTAAAGGACGAAGAATGTGAAGAAGACGTGAAGAGAGAGATTCGGATTATGAAGCAATTGTCTGGAGAACCAAACATTGTCGAGTTCAAGAATGCTTACGAGGACAAAGATTCTGTACATATTGTTATGGAATATTGTGGTGGTGGAGAGTTATACGACAAGATCCTAGCTTTGTACGATGTTGGGAAGTCTTACTCGGAGAAAGAAGCT…	ATGGGTTGCTTCAGCAGTAAGGAGCTACAACAATCGAAAAGAACCATTCTTGAGAAACCTTTAGTTGACATCACAAAGATTTATATCCTCGGGGAGGAATTGGGTAGAGGTAATTTCGGTCTAACCCGAAAGTGCGTTGAGAAATCTACAGGTAAGACATTCGCCTGCAAAACCATTCTCAAGACAAAGCTAAAGGACGAAGAATGTGAAGAAGACGTGAAGAGAGAGATTCGGATTATGAAGCAATTGTCTGGAGAACCAAACATTGTCGAGTTCAAGAATGCTTACGAGGACAAAGATTCTGTACATATTGTTATGGAATATTGTGGTGGTGGAGAGTTATACGACAAGATCCTAGCTTTGTACGATGTTGGGAAGTCTTACTCGGAGAAAGAAGCT…	MGCFSSKELQQSKRTILEKPLVDITKIYILGEELGRGNFGLTRKCVEKSTGKTFACKTILKTKLKDEECEEDVKREIRIMKQLSGEPNIVEFKNAYEDKDSVHIVMEYCGGGELYDKILALYDVGKSYSEKEAAGIIRSIVNVVKNCHYMGVMHRDLKPENFLLTSNDDNATVKVIDFGCSVFIEEGKVYQDLAGSDYYIAPEVLQGNYGKEADIWSAGIILYILLCGKSPFVKEPEGQMFNEIKSLEIDYSEEPWPLRDSRAIHLVKRMLDRNPKERISAAEVLGHPWMKEGEASDKPIDGVVLSRLKRFRDANKFKKVVLKFIAANLSEEEIKGLKTLFTNIDTDKSGNITLEELKTGLTRLGSNLSKTEVEQLMEAADMDGNGTIDIDEFISATMH…
AtCPK28		AT5G66210.1	AtChr5	reverse	26456284	26459631	AAAAGGCAAAAAAAGTGGGAAAGTGAGAAGGATCTTTCGTTGGGGATCCTCCTTGGAGGGGTTCACTCGGCGCTTTGGGTTTGACCAACTCAACTCTAATAATCTTCTCTGCCTTCCTCTCTTCTTCTTCTTTCTTCTTTCATCTCTTTCTTTTATTAATCCCCTTTCTTTTCTAACTTTCTCGATTCATCAGAGCCATGGGTGTCTGTTTCTCCGCCATTAGAGTCACTGGTGCTAGCAGCAGTAGACGAAGCAGTCAGACCAAATCCAAGGCTGCTCCTACTCCCATCGATACCAAGGCCTCTACCAAACGCCGAACCGGCTCCATCCCCTGCGGCAAGCGTACCGATTTTGGCTACTCCAAAGACTTCCACGATCACTACACCATCGGCAAGTTGC…	AAAAGGCAAAAAAAGTGGGAAAGTGAGAAGGATCTTTCGTTGGGGATCCTCCTTGGAGGGGTTCACTCGGCGCTTTGGAGCCATGGGTGTCTGTTTCTCCGCCATTAGAGTCACTGGTGCTAGCAGCAGTAGACGAAGCAGTCAGACCAAATCCAAGGCTGCTCCTACTCCCATCGATACCAAGGCCTCTACCAAACGCCGAACCGGCTCCATCCCCTGCGGCAAGCGTACCGATTTTGGCTACTCCAAAGACTTCCACGATCACTACACCATCGGCAAGTTGCTCGGCCATGGTCAATTCGGCTACACCTACGTCGCCATCCACAGACCCAATGGAGATCGCGTCGCCGTCAAAAGACTCGATAAGTCTAAGATGGTTCTTCCTATTGCTGTTGAGGA…	ATGGGTGTCTGTTTCTCCGCCATTAGAGTCACTGGTGCTAGCAGCAGTAGACGAAGCAGTCAGACCAAATCCAAGGCTGCTCCTACTCCCATCGATACCAAGGCCTCTACCAAACGCCGAACCGGCTCCATCCCCTGCGGCAAGCGTACCGATTTTGGCTACTCCAAAGACTTCCACGATCACTACACCATCGGCAAGTTGCTCGGCCATGGTCAATTCGGCTACACCTACGTCGCCATCCACAGACCCAATGGAGATCGCGTCGCCGTCAAAAGACTCGATAAGTCTAAGATGGTTCTTCCTATTGCTGTTGAGGATGTCAAGCGTGAGGTTCAGATTCTTATTGCTCTCTCTGGCCACGAGAATGTTGTTCAGTTTCACAATGCCTTTGAGGATGAC…	MGVCFSAIRVTGASSSRRSSQTKSKAAPTPIDTKASTKRRTGSIPCGKRTDFGYSKDFHDHYTIGKLLGHGQFGYTYVAIHRPNGDRVAVKRLDKSKMVLPIAVEDVKREVQILIALSGHENVVQFHNAFEDDDYVYIVMELCEGGELLDRILSKKGNRYSEKDAAVVVRQMLKVAGECHLHGLVHRDMKPENFLFKSAQLDSPLKATDFGLSDFIKPGKRFHDIVGSAYYVAPEVLKRRSGPESDVWSIGVITYILLCGRRPFWDRTEDGIFKEVLRNKPDFSRKPWATISDSAKDFVKKLLVKDPRARLTAAQALSHAWVREGGNATDIPVDISVLNNLRQFVRYSRLKQFALRALASTLDEAEISDLRDQFDAIDVDKNGVISLEEMRQALAKDLP…
AtCPK29		AT1G76040.1	AtChr1	forward	28537672	28540637	CATCCAACAAAAAGACAAAAAAAATCACAGAATAAGACCGAAGAGTCGAAGACCGATCTACTTTGCTCACATGCTTCAAAACCAACATAAAACGACCAAAAACCAGAGAAACAAAAACATTGGAACAAAATATTTTCTTAGAAAAAAAATTATGGGATTTTGCTTCTCCAAATTTGGCAAATCACAAACACATGAGATCCCAATCTCTTCCTCTTCCGATTCAAGCCCTCCTCATCACTACCAACCTCTCCCTAAACCAACTGTTTCTCAAGGTCAAACCAGTAATCCCACCTCCAATCCTCAGCCCAAACCCAAACCCGCTCCTCCTCCTCCTCCGTCAACATCCTCCGGTTCACAAATCGGTCCAATCCTAAACCGACCAATGATCGATCTCTCAGC…	ATTCTTTTGAACATTTTGATTCACACCAAAATATCAAAAGACTTTTGAGACTGGAGAGCTGTATTAGAATTTGAATATGTTTGAATGCATATTAGCTAAAACTTTGGTTCTGTATTTTGAAATCCGTACAAGTAATCATCTTATATGGTTAATATTTGTAGGTAAAGTGTATAGAGATATAGTTGGGAGCGCATACTACGTTGCACCTGAAGTTCTACATCGAAACTACGGGAAAGAAATCGATGTATGGAGCGCGGGTGTTATGCTTTACATTCTTCTCAGTGGTGTTCCTCCATTTTGGGGAGAGACCGAGAAGACTATATTTGAGGCGATCTTAGAAGGAAAGCTGGATCTTGAAACTTCTCCTTGGCCTACTATATCGGAAAGCGCAAAAGATTT…	ATGTTTGAATGCATATTAGCTAAAACTTTGGTTCTGTATTTTGAAATCCGTACAAGTAATCATCTTATATGGTTAATATTTGTAGGTAAAGTGTATAGAGATATAGTTGGGAGCGCATACTACGTTGCACCTGAAGTTCTACATCGAAACTACGGGAAAGAAATCGATGTATGGAGCGCGGGTGTTATGCTTTACATTCTTCTCAGTGGTGTTCCTCCATTTTGGGGAGAGACCGAGAAGACTATATTTGAGGCGATCTTAGAAGGAAAGCTGGATCTTGAAACTTCTCCTTGGCCTACTATATCGGAAAGCGCAAAAGATTTGATAAGAAAGATGTTGATAAGAGATCCTAAAAAAAGGATAACCGCAGCTGAAGCACTTGAGCATCCATGGATGACA…	MFECILAKTLVLYFEIRTSNHLIWLIFVGKVYRDIVGSAYYVAPEVLHRNYGKEIDVWSAGVMLYILLSGVPPFWGETEKTIFEAILEGKLDLETSPWPTISESAKDLIRKMLIRDPKKRITAAEALEHPWMTDTKISDKPINSAVLVRMKQFRAMNKLKKLALKVIAENLSEEEIKGLKQTFKNMDTDESGTITFDELRNGLHRLGSKLTESEIKQLMEAADVDKSGTIDYIEFVTATMHRHRLEKEENLIEAFKYFDKDRSGFITRDELKHSMTEYGMGDDATIDEVINDVDTDNDGRINYEEFVAMMRKGTTDSDPKLIR
AtCPK30		AT1G74740.1	AtChr1	reverse	28079945	28082644	AATTTTACGAAAAGGTCGAAACTTTCTTCAGCTGAACCCGTGTTTCCTCTTCTCTGCAACTCACCGGTTCGCCGGAAAACTCTACGCCGTCGCCGGATTTTGCACCAACGAAAACTTCTTTAAACTACTTTCTTCATTATTCTTCTGCTGAGTTTCAAAAACTCAGCCATGGGTAATTGTATCGCCTGCGTCAAGTTTGACCCAGACAACTCAAAACCAAACCAGAAGAAGAAACCTCCACGGGGACGGCAACGAAACCCATACGACGATCCCGATGGTTTAAGAACTCACGCACCGTTACGTGTGATTCCTATGAGCCATCAATCTCAGATCAGCGACAAGTACATCTTAGGACGAGAACTCGGTCGCGGCGAATTCGGAATCACGTATCTTTGTACA…	AATTTTACGAAAAGGTCGAAACTTTCTTCAGCTGAACCCGTGTTTCCTCTTCTCTGCAACTCACCGGTTCGCCGGAAAACTCTACGCCGTCGCCGGATTTTGCACCAACGAAAACTTCTTTAAACTACTTTCTTCATTATTCTTCTGCTGAGTTTCAAAAACTCAGCCATGGGTAATTGTATCGCCTGCGTCAAGTTTGACCCAGACAACTCAAAACCAAACCAGAAGAAGAAACCTCCACGGGGACGGCAACGAAACCCATACGACGATCCCGATGGTTTAAGAACTCACGCACCGTTACGTGTGATTCCTATGAGCCATCAATCTCAGATCAGCGACAAGTACATCTTAGGACGAGAACTCGGTCGCGGCGAATTCGGAATCACGTATCTTTGTACA…	ATGGGTAATTGTATCGCCTGCGTCAAGTTTGACCCAGACAACTCAAAACCAAACCAGAAGAAGAAACCTCCACGGGGACGGCAACGAAACCCATACGACGATCCCGATGGTTTAAGAACTCACGCACCGTTACGTGTGATTCCTATGAGCCATCAATCTCAGATCAGCGACAAGTACATCTTAGGACGAGAACTCGGTCGCGGCGAATTCGGAATCACGTATCTTTGTACAGATAGAGAGACTCGTGAAGCTTTAGCTTGCAAATCAATCTCCAAGAGAAAGCTCCGAACCGCCGTCGATGTGGAAGACGTCCGTCGTGAAGTCACGATCATGTCAACTTTACCGGAACACCCAAACGTTGTGAAACTTAAAGCGACTTATGAGGATAACGAGAACGTG…	MGNCIACVKFDPDNSKPNQKKKPPRGRQRNPYDDPDGLRTHAPLRVIPMSHQSQISDKYILGRELGRGEFGITYLCTDRETREALACKSISKRKLRTAVDVEDVRREVTIMSTLPEHPNVVKLKATYEDNENVHLVMELCEGGELFDRIVARGHYTERAAATVARTIAEVVRMCHVNGVMHRDLKPENFLFANKKENSALKAIDFGLSVLFKPGERFTEIVGSPYYMAPEVLKRNYGPEVDVWSAGVILYILLCGVPPFWAETEQGVALAILRGVLDFKRDPWSQISESAKSLVKQMLEPDSTKRLTAQQVLDHPWIQNAKKAPNVPLGDIVRSRLKQFSMMNRLKKKALRVIAEHLSIQEVEVIRNMFTLMDDDNDGKISYLELRAGLRKVGSQLGEP…
AtCPK31		AT4G04695.1	AtChr4	reverse	2381633	2383996	ATGGGTTGCTACAGCAGTAAGAACCTAAAACAATCAAAAAGAACCATTCTTGAGAAACCATTCGTTGACATCGGAAAGGTTTACATCCTCGGGGATGAATTGGGTCAAGGCCAATTCGGTATAACTCGAAAATGCGTTGAGAAGACTTCAGGTAAGACTTACGCCTGCAAGACCATTCTCAAGACGAATCTAAAGAGTAGAGAAGATGAAGAAGCCGTGAAGAGAGAGATTCGTATCATGAAGCATTTGTCTGGAGAACCGAACATTGTTGAGTTCAAGAAAGCTTACGAGGACAGAGATTCTGTACATATTGTTATGGAATATTGTGGTGGTGGAGAGTTATTCAAAAAGATCGAAGCTTTGTCCAAAGATGGAAAGTCTTACTCCGAGAAAGAAGCT…	ATGGGTTGCTACAGCAGTAAGAACCTAAAACAATCAAAAAGAACCATTCTTGAGAAACCATTCGTTGACATCGGAAAGGTTTACATCCTCGGGGATGAATTGGGTCAAGGCCAATTCGGTATAACTCGAAAATGCGTTGAGAAGACTTCAGGTAAGACTTACGCCTGCAAGACCATTCTCAAGACGAATCTAAAGAGTAGAGAAGATGAAGAAGCCGTGAAGAGAGAGATTCGTATCATGAAGCATTTGTCTGGAGAACCGAACATTGTTGAGTTCAAGAAAGCTTACGAGGACAGAGATTCTGTACATATTGTTATGGAATATTGTGGTGGTGGAGAGTTATTCAAAAAGATCGAAGCTTTGTCCAAAGATGGAAAGTCTTACTCCGAGAAAGAAGCT…	ATGGGTTGCTACAGCAGTAAGAACCTAAAACAATCAAAAAGAACCATTCTTGAGAAACCATTCGTTGACATCGGAAAGGTTTACATCCTCGGGGATGAATTGGGTCAAGGCCAATTCGGTATAACTCGAAAATGCGTTGAGAAGACTTCAGGTAAGACTTACGCCTGCAAGACCATTCTCAAGACGAATCTAAAGAGTAGAGAAGATGAAGAAGCCGTGAAGAGAGAGATTCGTATCATGAAGCATTTGTCTGGAGAACCGAACATTGTTGAGTTCAAGAAAGCTTACGAGGACAGAGATTCTGTACATATTGTTATGGAATATTGTGGTGGTGGAGAGTTATTCAAAAAGATCGAAGCTTTGTCCAAAGATGGAAAGTCTTACTCCGAGAAAGAAGCT…	MGCYSSKNLKQSKRTILEKPFVDIGKVYILGDELGQGQFGITRKCVEKTSGKTYACKTILKTNLKSREDEEAVKREIRIMKHLSGEPNIVEFKKAYEDRDSVHIVMEYCGGGELFKKIEALSKDGKSYSEKEAVEIIRPIVNVVKNCHYMGVMLRDLKPENFLLSSTDKNATVKAIDFGCSVFIEEGEVHRKFAGSAYYIAPEVLQGKYGKEADIWSAGIILYILLCGKPPFVTEPEAQMFSEIKSAKIDVDSESWKFIDVKAKHLVNRMLNRNPKERISAAEVLGHPWMKDGEASDKPIDGVVLSRLKQFRDMNKLKKVALKVIAANLSEEEIKGLKTLFTNIDTDKSGTITLEELKTGLTRLGSNLSKTEVEQLMEAADVDGNGTIDIDEFISATMH…
AtCPK32		AT3G57530.1	AtChr3	reverse	21296553	21299591	CTCTCTCTCTCTCTCTGTAATTAATTTTTCGCAATTTTAATTTTCGAACAAATGATTTGACGTTCTTCTTGGTATTCACGCGTTGAAAATTTCCACCCTTTCATATATTGTTCTTCACCTCCTTCGTTTTTTTCTCATCCATCTCTTCCAGAATTCTCTTAAAGTTTCCTACTTTCCTGGAATTTCGTCCTCAATCTCTCAAGTTTCATCGGTTTTGATTTGGGTTTGATCGGAAAAGTCATGGGTAATTGTTGCGGAACAGCAGGATCATTGGCTCAAAACGATAACAAACCCAAAAAAGGAAGGAAGAAGCAAAACCCTTTCTCGATTGATTACGGTCTTCACCACGGTGGTGGAGATGGAGGTGGAAGACCTCTTAAGCTTATCGTTTTGAATGAT…	CTCTCTCTCTCTCTCTGTAATTAATTTTTCGCAATTTTAATTTTCGAACAAATGATTTGACGTTCTTCTTGGTATTCACGCGTTGAAAATTTCCACCCTTTCATATATTGTTCTTCACCTCCTTCGTTTTTTTCTCATCCATCTCTTCCAGAATTCTCTTAAAGTTTCCTACTTTCCTGGAATTTCGTCCTCAATCTCTCAAGTTTCATCGGTTTTGATTTGGGTTTGATCGGAAAAGTCATGGGTAATTGTTGCGGAACAGCAGGATCATTGGCTCAAAACGATAACAAACCCAAAAAAGGAAGGAAGAAGCAAAACCCTTTCTCGATTGATTACGGTCTTCACCACGGTGGTGGAGATGGAGGTGGAAGACCTCTTAAGCTTATCGTTTTGAATGAT…	ATGGGTAATTGTTGCGGAACAGCAGGATCATTGGCTCAAAACGATAACAAACCCAAAAAAGGAAGGAAGAAGCAAAACCCTTTCTCGATTGATTACGGTCTTCACCACGGTGGTGGAGATGGAGGTGGAAGACCTCTTAAGCTTATCGTTTTGAATGATCCAACAGGTCGTGAGATCGAGTCTAAATACACGTTGGGGAGAGAGCTAGGTCGTGGAGAATTCGGTGTTACGTATCTATGTACTGATAAGGAGACAGACGACGTTTTTGCTTGTAAATCGATTTTGAAGAAGAAGCTGAGGACAGCTGTTGATATTGAAGATGTTAGGAGAGAGGTTGAGATTATGAGGCATATGCCTGAGCATCCTAATGTTGTTACTTTGAAGGAGACTTATGAGGAT…	MGNCCGTAGSLAQNDNKPKKGRKKQNPFSIDYGLHHGGGDGGGRPLKLIVLNDPTGREIESKYTLGRELGRGEFGVTYLCTDKETDDVFACKSILKKKLRTAVDIEDVRREVEIMRHMPEHPNVVTLKETYEDEHAVHLVMELCEGGELFDRIVARGHYTERAAAAVTKTIMEVVQVCHKHGVMHRDLKPENFLFGNKKETAPLKAIDFGLSVFFKPGERFNEIVGSPYYMAPEVLKRNYGPEVDIWSAGVILYILLCGVPPFWAETEQGVAQAIIRSVLDFRRDPWPKVSENAKDLIRKMLDPDQKRRLTAQQVLDHPWLQNAKTAPNVSLGETVRARLKQFTVMNKLKKRALRVIAEHLSDEEASGIREGFQIMDTSQRGKINIDELKIGLQKLGHA…
AtCPK33		AT1G50700.1	AtChr1	forward	18781913	18784582	GTAACTTCTTCTTCCCCAACTTTTCATGATTCTTCTGCAATTCAACTTTCCAAACAATCATTTGTTCTAAATCTCTTAAACACAAATCTTTGCTTGATTAACCAAGTTCGTTGTCCTTAGTTGCTGAATTGTAGCCTATACGTCTTCTAGTATAAACCCACCCAAAAAAAAGATCAAACCTTTGCTTATTTCTCTGTTTTATATCCCTGATTCTCTGCAAATTTTCACGAAAGGTTCGATCTTTGGTCTCTGGGTCGTGATATTTTGAGCTTATTTAGCTAAAGCAAAGACGAACGGGCAATGGGGAATTGCTTAGCCAAGAAATACGGATTGGTGATGAAACCACAACAAAATGGTGAAAGATCAGTTGAGATCGAGAACAGAAGAAGGAGCACCCAC…	GTAACTTCTTCTTCCCCAACTTTTCATGATTCTTCTGCAATTCAACTTTCCAAACAATCATTTGTTCTAAATCTCTTAAACACAAATCTTTGCTTGATTAACCAAGTTCGTTGTCCTTAGTTGCTGAATTGTAGCCTATACGTCTTCTAGTATAAACCCACCCAAAAAAAAGATCAAACCTTTGCTTATTTCTCTGTTTTATATCCCTGATTCTCTGCAAATTTTCACGAAAGGTTCGATCTTTGGTCTCTGGGTCGTGATATTTTGAGCTTATTTAGCTAAAGCAAAGACGAACGGGCAATGGGGAATTGCTTAGCCAAGAAATACGGATTGGTGATGAAACCACAACAAAATGGTGAAAGATCAGTTGAGATCGAGAACAGAAGAAGGAGCACCCAC…	ATGGGGAATTGCTTAGCCAAGAAATACGGATTGGTGATGAAACCACAACAAAATGGTGAAAGATCAGTTGAGATCGAGAACAGAAGAAGGAGCACCCACCAAGATCCGTCTAAAATATCCACCGGAACGAATCAACCACCACCTTGGCGGAATCCAGCGAAACACAGTGGTGCTGCAGCTATACTCGAGAAGCCGTACGAAGACGTGAAACTGTTCTACACTTTGAGCAAAGAATTGGGTCGAGGCCAGTTTGGAGTAACGTATCTGTGCACAGAGAAGTCGACGGGGAAGAGATTCGCTTGCAAGTCGATTTCCAAGAAGAAACTTGTGACGAAAGGTGATAAAGAAGATATGAGGAGAGAGATTCAGATTATGCAGCATTTGAGTGGACAACCTAAC…	MGNCLAKKYGLVMKPQQNGERSVEIENRRRSTHQDPSKISTGTNQPPPWRNPAKHSGAAAILEKPYEDVKLFYTLSKELGRGQFGVTYLCTEKSTGKRFACKSISKKKLVTKGDKEDMRREIQIMQHLSGQPNIVEFKGAYEDEKAVNLVMELCAGGELFDRILAKGHYSERAAASVCRQIVNVVNICHFMGVMHRDLKPENFLLSSKDEKALIKATDFGLSVFIEEGRVYKDIVGSAYYVAPEVLKRRYGKEIDIWSAGIILYILLSGVPPFWAETEKGIFDAILEGEIDFESQPWPSISNSAKDLVRRMLTQDPKRRISAAEVLKHPWLREGGEASDKPIDSAVLSRMKQFRAMNKLKKLALKVIAENIDTEEIQGLKAMFANIDTDNSGTITYEEL…
AtCPK34		AT5G19360.1	AtChr5	reverse	6521715	6523780	ATGGGAAATTGTTGCTCTCATGGAAGAGATTCAGATGATAACAAAGAAGAACCGAGGCCGGAAAATGGAGGCGGCGGTGTTGGTGCCGCTGAAGCCTCTGTTAGAGCTTCTAAACACCCGCCAGCATCTCCTCCTCCTGCAACCAAACAAGGACCAATAGGACCTGTCTTAGGGCGACCAATGGAAGATGTAAAGAGCTCATATACATTGGGTAAGGAGCTAGGTCGTGGACAGTTTGGGGTGACTCATCTCTGCACGCAAAAGGCCACGGGGCTGCAATTCGCTTGCAAGACCATTGCTAAAAGGAAGCTCGTGAACAAAGAAGACATTGAGGATGTGAGAAGGGAGGTGCAGATTATGCATCACTTGACCGGTCAGCCAAACATTGTGGAGCTTAAA…	ATGGGAAATTGTTGCTCTCATGGAAGAGATTCAGATGATAACAAAGAAGAACCGAGGCCGGAAAATGGAGGCGGCGGTGTTGGTGCCGCTGAAGCCTCTGTTAGAGCTTCTAAACACCCGCCAGCATCTCCTCCTCCTGCAACCAAACAAGGACCAATAGGACCTGTCTTAGGGCGACCAATGGAAGATGTAAAGAGCTCATATACATTGGGTAAGGAGCTAGGTCGTGGACAGTTTGGGGTGACTCATCTCTGCACGCAAAAGGCCACGGGGCTGCAATTCGCTTGCAAGACCATTGCTAAAAGGAAGCTCGTGAACAAAGAAGACATTGAGGATGTGAGAAGGGAGGTGCAGATTATGCATCACTTGACCGGTCAGCCAAACATTGTGGAGCTTAAA…	ATGGGAAATTGTTGCTCTCATGGAAGAGATTCAGATGATAACAAAGAAGAACCGAGGCCGGAAAATGGAGGCGGCGGTGTTGGTGCCGCTGAAGCCTCTGTTAGAGCTTCTAAACACCCGCCAGCATCTCCTCCTCCTGCAACCAAACAAGGACCAATAGGACCTGTCTTAGGGCGACCAATGGAAGATGTAAAGAGCTCATATACATTGGGTAAGGAGCTAGGTCGTGGACAGTTTGGGGTGACTCATCTCTGCACGCAAAAGGCCACGGGGCTGCAATTCGCTTGCAAGACCATTGCTAAAAGGAAGCTCGTGAACAAAGAAGACATTGAGGATGTGAGAAGGGAGGTGCAGATTATGCATCACTTGACCGGTCAGCCAAACATTGTGGAGCTTAAA…	MGNCCSHGRDSDDNKEEPRPENGGGGVGAAEASVRASKHPPASPPPATKQGPIGPVLGRPMEDVKSSYTLGKELGRGQFGVTHLCTQKATGLQFACKTIAKRKLVNKEDIEDVRREVQIMHHLTGQPNIVELKGAYEDKHSVHLVMELCAGGELFDRIIAKGHYSERAAASLLRTIVQIIHTCHSMGVIHRDLKPENFLLLSKDENSPLKATDFGLSVFYKPGEVFKDIVGSAYYIAPEVLRRKYGPEADIWSIGVMLYILLCGVPPFWAESENGIFNAILSGQVDFSSDPWPVISPQAKDLVRKMLNSDPKQRLTAAQVLNHPWIKEDGEAPDVPLDNAVMSRLKQFKAMNNFKKVALRVIAGCLSEEEIMGLKEMFKGMDTDNSGTITLEELRQGLA…
GmGene Name		Phytozome ID	Peptide
GmCPK1		Glyma01g37100.1	MGLCFSSTKVSGSSSNNNNNNNASSNRNRKCSAAPAAAAPPEPVTPQKKQPSQAQRRRVPEESRKNPRAKDKAGARRQGTRVPCGKRTDFGYEKDFENRFSLGKLLGHGQFGYTYVGIDKKNGDRVAVKRLEKSKMVLPIAVEDVKREVKILKELTGHENVVQFFNAFEDDSYVYIVMELCEGGELLDRILAKKDSRYTEKDAAVVVRQMLKVAAECHLHGLVHRDMKPENFLFKSTKEDSPLKATDFGLSDFIKPGKRFQDIVGSAYYVAPEVLKRKSGPESDVWSIGVITYILLCGRRPFWDKTEDGIFKEVLRNKPDFRRKPWPTISNAAKDFMKKLLVKDPRARYTAAQALSHPWVREGGEALEIPIDISVLNNMRQFVKYSRLKQFALRALAST…
GmCPK2		Glyma01g43241.1	MRQKPNVRLSHQSHMVSRFSPDRVNTKKQQRSNDTVSMGNCNSEASSQTQPHSDHHPQPRSNSNGITVLPPNSKPSVGRVLGRPMEDVRSTYTFGRELGRGQFGVTYLVTHKHTKQQFACKSIATPKLVHRDDLEDVRREVQIMHHLTGHRNIVELKGAYEDRHSVNLIMELCGGGELFDRIIAKGHYSERAAADLCRQIVTVVHDCHTMGVMHRDLKPENFLFLSKDENSPLKATDFGLSVFFKPGDVFKDLVGSAYYVAPEVLRRSYGPEADIWSAGVILFILLSGVPPFWSKKEQGIFDAILRGHIDFTSDPWPSISSSAKDLVKKMLRADPKQRLSAVEVLDHPWMREDGASDKPLDVAVLSRMKQFRAMNKLKKVALKVIAENLSEEEIIGLKE…
GmCPK3		Glyma02g05440.1	MGACFSATKVSGSNGNGVNVNKKRRGTTKKPKSETAKANPQRHKAASSRHVPCGKRTDFGYKKDFNQRYSLGKLLGHGQFGYTYVGIDKANGDRVAVKRLEKSKMVLPIAVEDVKREVKILKALTGHENVVQFYNAFEDDSYVFIVMELCEGGELLDRILAKKDGRYTEKDSAVVVRQMLKVAAECHLHGLVHRDMKPENFLFKSIKEDSPLKATDFGLSDFIKPGKKFHDIVGSAYYVAPEVLKRKSGPQSDVWSIGVITYILLCGRRPFWDKTEDGIFKEVLRKKPDFHRKPWPTISNAAKDFLKRLLVKDPRARLTAAQGLSHPWVREGGEALEIPIDISVLSNMRQFVKYSRMKQFALRTLASTLNEEELADIKDQFDAIDVDKNGSISLEEMRQ…
GmCPK4		Glyma02g34890.1	MGNNCVGSRTSSSKDGTNGSSNSSSFWWSRGHKKDASHAHKSGKKSAKAAETVQNKPPEMVKIEREDVKPPHQSKETKPPSEETKEQPTKPKRPHNVKRLASAGLKTDSVLQRKTGNLKEFYNLGPKLGQGQFGTTFLCVEKITGKEYACKSILKRKLLTDEDVEDVRREIQIMHHLAGSPNVISIKEAFEDAVAVHVVMELCAGGELFDRIVERGHYTERKAAKLARTIVGVIESCHSLGVMHRDLKPENFLFVNQQEESPLKAIDFGLSAFFKPGEIFGDVVGSPYYVAPEVLRKRYGPEADVWSAGVIIYILLSGVPPFWGESEQDIFEAILHSDLDFSSDPWPAISESAKDLVRKVLVRDPTKRITAYEVLRHPWIQVDGAAPDKPLDSAVLSRL…
GmCPK5		Glyma02g44720.1	MGNCCSGGTNDTEDKRETNQPTSDNGGGGATATATATAAATTPPPSSKAKQSKPAAIGPVLGRAMEDVKSTYSMGKELGRGQFGVTHLCTHKSTGKQYACKTIAKRKLVNKEDIEDVKREVQIMHHLSGQANIVELVNVYEDKQSVHLVMELCAGGELFDRIIAKGHYTERAAASLLRTIVQIVHTCHSMGVIHRDLKPENFLLLNKDENAPLKATDFGLSVFYKQGEMFKDIVGSAYYIAPEVLKRKYGPEVDIWSIGVMLYILLCGVPPFWAESENGIFNAILRGHVDFTSDPWPSISPAAKDLVRKMLHSDPRQRMTAYEVLNHPWIKEDGEAPDTPLDNAVLNRLKQFRAMNEFKKVALRVIAGCLSEEEIMGLKQMFRGMDTDNSGTITIEELK…
GmCPK6		Glyma02g46070.1	MGCCMSKKGSEPEEHIVYRHVAGAGGAGVYNNHKSHEPPSHQPYPLPEKHAPWRPPPSPKHVHKHDTITGKPFEDVKQHYTLGKELGRGQFGVTYLCTENSTGFQYACKSISKRKLVSRDDKEDMKREIQIMQHLSGQSNIVEFKGAFEDKQSVHVVMELCAGGELFDRIIAKGHYSERAAASICRQVVKVVNTCHFMGVIHRDLKPENFLLSSKDDKGLLKATDFGLSVFIEEGKVYRDIVGSAYYVAPEVLRRSYGKEADIWSAGVILYILLSGVPPFWAETEKGIFDVILQGHIDFESSPWPSISNSAKDLVRKMLIKDPKKRITAAQVLEHPWLKEGGNASDKPIDSAVLSRMKQFRAMNKLKKLALKVIAENLSEEEIQGLKAMFTNIDTDNSG…
GmCPK7		Glyma02g48160.1	MGNTCRGSLKGKYSQGLSQPEDHSKPTTTHSDPSSDHPSTKQSAENYNNNNYLPFNAKRESIMRRGLDNQAYYVLGHKTPNIRDLYTLGRKLGQGQFGTTYLCTENATSIEYACKSISKRKLISKEDVEDVRREIQIMHHLAGHKNIVTIKGAYEDPLYVHIVMELCSGGELFDRIIQRGHYTERKAADLTKIIVGVVEACHSLGVMHRDLKPENFLLVNKDDDFSLKAIDFGLSVFFKPGQVFTDVVGSPYYVAPEVLLKHYGPEADVWTAGVILYILLSGVPPFWAETQQGIFDAVLKGLIDFDSDPWPLISDSAKDLIRKMLCSRPSERLTAHQVLCHPWICENGVAPDRSLDPAVLSRLKQFSAMNKLKKMALRVIAESLSEEEIAGLREMFQAM…
GmCPK8		Glyma04g34440.1	MGNCNACAKADVVEDSTNNRNKKSNETNRGGRKKEQNQKKPNPFSDEPARSAAPIRVLKDVIPMSHRTRISDKYILGRELGRGEFGITYLCTDRETKEALACKSISKRKLRTAVDIEDVRREVAIMSTLPEHPNIVKLKATYEDNENVHLVMELCEGGELFDRIVARGHYSERAAASVARTIAEVVRMCHSNGVMHRDLKPENFLFANKKENSALKAIDFGLSVFFKPGERFVEIVGSPYYMAPEVLKRNYGPEVDVWSAGVILYILLCGVPPFWAETEQGVALAILRGVIDFKREPWPQISESAKSLVRRMLEPDPKKRLTAEQVLEHPWLQNAKKAPNVPLGDIVRSRLKQFSVMNRFKKKALRVIAEHLSVEEVEIIKDMFTLMDTDKDGRVTFEE…
GmCPK9		Glyma04g38150.1	MAKPHSGTPAVAPKPAWVLPYRTENLREVYTLSRKLGQGQFGTTFLCTHKGTGRTYACKSIPKRKLLCKEDYDDVWREIQIMHHLSEQPNVVRIHGTYEDAASVHLVMELCEGGELFDRIVRKGHYSERQAAKLIKTIVEVVEACHSLGVMHRDLKPENFLFDTVEEDAKLKTTDFGLSVFYKPGETFCDVVGSPYYVAPEVLRKHYGPEADVWSAGVILYILLSGVPPFWAETEQGIFRQILLGRLDFQSEPWPSISDSAKDLIRKMLDRNPKTRVTAHQVLCHPWIVDDNIAPDKPLDSAVLSRLKQFSAMNKLKKMALRVIAERLSEEEIGGLKELFRMIDADNSGTITFDELKEGLKRVGSELMESEIKDLMDAADIDNSGTIDYGEFIAATVHL…
GmCPK10		Glyma05g01470.1	MGNCNACVRVDDVADSNRGKKNKKTKPNPYAEEEIRSGVPIRVLKDVTSRSLIGDKYVIGRELGRGEFGITYLCTDRETKQELACKSISKRKLRTAIDVEDVRREVAIMSTLPEHANVVKLKATYEDEENVHLVMELCAGGELFDRIVARGHYSERAAANVARTIAEVVRMCHANGVMHRDLKPENFLFANKKENSVLKAIDFGLSVFFKPGERFSEIVGSPYYMAPEVLKRNYGPEVDVWSAGVILYILLCGVPPFWAEDERGVALAILRGVIDFKREPWPQISDSAKSLVRQMLEHDPKKRLTAEQVLEHSWLQNAKKASNVPLGDIVRTRLRQFSLMNRLKKRALRVIAEHLSVEEVEIIKDMFTLMDTNKDGKVTYEELKVGLRKVGSQLAEPEI…
GmCPK11		Glyma05g33240.1	MAAKSSSSSTTNVVTLKAAWVLPQRTQNIREVYEVGRKLGQGQFGTTFECTRRASGGKFACKSIPKRKLLCKEDYEDVWREIQIMHHLSEHAHVVRIEGTYEDSSAVHLVMELCEGGELFDRIVQKGHYSERQAARLIKTIVEVVEACHSLGVMHRDLKPENFLFDTVDEDAKLKATDFGLSVFYKPGESFCDVVGSPYYVAPEVLRKHYGPESDVWSAGVILYILLSGVPPFWAESEPGIFRQILLGKLDFQSEPWPSISDSAKDLIRKMLDQNPKTRLTAHEVLRHPWIVDDNIAPDKPLDSAVLSRLKQFSAMNKLKKMALRVIAERLSEEEIGGLKELFKMIDTDNSGTITFDELKDGLKRVGSELMESEIKDLMDAADIDKSGTIDYGEFIAAT…
GmCPK12		Glyma05g37260.1	MGNCSSGAGAPTTYSDDHPHHNGITVLPPNSNPSPQLPKPPPTSSSSSSLGRVLGRPMEDVRSIYIFGRELGRGQFGVTYLVTHKATKEQFACKSIATRKLVNRDDIDDIRREVQIMHHLTGHRNIVELKGAYEDRHSVNLVMELCAGGELFDRIITKGHYSERAAANSCRQIVTVVHNCHSMGVMHRDLKPENFLLLNKNDDSPLKATDFGLSVFFKPGDVFRDLVGSAYYVAPEVLRRSYGPEADIWSAGVILYILLSGVPPFWAENEQGIFDAILRGHIDFASDPWPSISSSAKDLVKKMLRADPKERLSAVEVLNHPWMRVDGDAPDKPLDIAVLTRMKQFRAMNKLKKVALKVIAENLSEEEIIGLKEMFKSMDTDNSGTITFEELKAGLPKLG…
GmCPK13		Glyma06g20170.1	MGNCNVCAKADVVEDSNNNRNKKSNETNRARKKEPKPFTDEPARSTAAPIRVLKDVIPMSHRTRISDKYILGRELGRGEFGITYLCTDRETKEALACKSISKRKLRTAVDIDDVRREVAIMSTLPEHPNVVKLKATYEDNENVHLVMELCEGGELFDRIVARGHYSERAAAAVARTIAEVVRMCHSNGVMHRDLKPENFLFANKKENSALKAIDFGLSVFFKPGERFSEIVGSPYYMAPEVLKRNYGPEVDVWSAGVILYILLCGVPPFWAETEQGVALAILRGVIDFKREPWPQISESAKSLVRRMLEPDPKNRLTAEQVLEHPWLQNAKKAPNVPLGDIVRSRLKQFSVMNRFKKKALRVIADHLSVEEVEIIKDMFTLMDTDKDGRVTFEELKAGL…
GmCPK14		Glyma07g36000.1	MGNCCSQGNGADGPSDDAAANDKGETNQQSSNHANNNDNSANPTTAPPPTSTPPPTVTPPTSKPSKPAAMGPVLGRPMEDVRATYTIGKELGRGQFGVTHLCTNKTTGQQFACKTIAKRKLVNKEDIEDVRREVQIMNHLSGQSNIVELKGAYEDKQSVHLVMELCAGGELFDRIIAKGHYTERAAASLLRTIMQIIHTFHSMGVIHRDLKPENFLMLNKDENSPVKVTDFGLSVFFKEGETFKDIVGSAYYIAPEVLKRKYGPEVDIWSVGVMLYILLSGVPPFWAESEHGIFNAILRGHIDFTSDPWPSISNAAKDLVRKMLTTDPKQRLTSQEVLNHPWIKEDGEAPDKPLDNAVLNRLKQFRAMNQFKKVALRVIAGCLSEEEIMGLKEMFKGMD…
GmCPK15		Glyma07g39010.1	MGCHGSKEKKSNTSYGSAATGSGSGSGSGGGYNTVQPSPPTTDQVQASAQTPENRKASPTVQKKADTSIVGKPFDDIKKYYSIGKELGRGQFGITYLCTENSSGGTYACKSILKRKLVSKADREDMKREIQIMQHLSGQPNIVEFKGAFEDRFSVHLVMELCSGGELFDRIIAQGHYSERAAASLCRSIVNVVHICHFMGVMHRDLKPENFLLSTKDDHATLKATDFGLSVFIEQGKVYHDMVGSAYYVAPEVLRRSYGKEIDIWSAGIILYILLSGVPPFWAETEKGIFNAILEGEIDFVSEPWPSISDSAKDLVRKMLTQDPKKRITSAQVLEHPWMREGGDASDKPIDSAVLSRMKQFRAMNKLKKLALKVIAENLSEEEIKGLKAMFANMDTDSS…
GmCPK16		Glyma08g00840.1	MAAKSSSSSTTTNVVTLKAAWVLPQRTQNIREVYEVGRKLGQGQFGTTFECTRRASGGKFACKSIPKRKLLCKEDYEDVWREIQIMHHLSEHANVVRIEGTYEDSTAVHLVMELCEGGELFDRIVQKGHYSERQAARLIKTIVEVVEACHSLGVMHRDLKPENFLFDTIDEDAKLKATDFGLSVFYKPGESFCDVVGSPYYVAPEVLRKLYGPESDVWSAGVILYILLSGVPPFWAESEPGIFRQILLGKLDFHSEPWPSISDSAKDLIRKMLDQNPKTRLTAHEVLRHPWIVDDNIAPDKPLDSAVLSRLKQFSAMNKLKKMALRVIAERLSEEEIGGLKELFKMIDTDNSGTITFDELKDGLKRVGSELMESEIKDLMDAADIDKSGTIDYGEFIAA…
GmCPK17		Glyma08g02300.2	PPATSSLGRRMEDMRSIYIFGRELGRGQFGVTYLVTHKATKEQFACKSIATRKLVNRDDIDDIRREVQIMHHLTGHRNIVELKGAYEDRHSVNLVMELCAGGELFDRIITKSHYSERAAANSCRQIVTVGLDENFLLLNHNDDSPLKATDFGLSVFFKPGDVFRDLVGSAYYVAPEVLRRSYGPETDIWSAGVILYILLSGVPPFWAENEQGIFDAILRGHIDFASDPWPSISSSAKDLVKKMLRADPKERLSAVEVLNHPWMRVDGDASDKPLDIAVLTRMKHFRAMNKLKKVALKVIAENLSEEEIIGLKEMFKSMDTDNSGTITFEELKAGLPKLGSKLSESEVRQLMEAADIDGNGTIDYIEFITATMHMNRMEREDRLYKAFEYFDNDKSGYIT…
GmCPK18		Glyma08g42850.1	MGCCASKESEPQHNGYRHAGTGGVHNQKTHEPLVNQSRAPANQPYHLHEKHAASTAQTVPQNMPWKPPGPALSPKPVVGVRQDTILGKQFEDVKQFYTLGKELGRGQFGVTYLCTENSTGLQYACKSISKRKLASKSDKEDIKREIQIMQHLSGQPNIVEFKGAYEDRSSVHVVMELCAGGELFDRIIAKGHYSEKAAASICRQIVNVVHICHFMGVMHRDLKPENFLLSSRDENALLKATDFGLSVFIEEGKVYRDIVGSAYYVAPEVLRRRCGKEIDIWSAGVILYILLSGVPPFWAETEKGIFDAILEGHIDFESQPWPNISDSAKDLVRKMLIQDPKKRITSAQVLEHPWIKDGNASDKPIDSAVLSRMKQFRAMNKLKKLALKVIAENMSAEEI…
GmCPK19		Glyma10g10501.1	MGNNCVGSRTSSKDVTNGCSNSSSFWWSRGHKKDASSHAHKSGNKKRTKAAETVQNKPPEMVKIEREDVKPPHESKETKPASEPTTTKEQQQAAKPKRPHNVKRLASAGLKTDSVLLRKTGNLKEFYNLGPKLGQGQFGTTFLCVEKISGKEYACKSILKRKLLTDEDVEDVRREIQIMHHLAGSPNVISIKEAFEDAVAVHVVMELCAGGELFDRIVERGHYTERKAAKLARTIVGVIESCHSLGVMHRDLKPENFLFVNQQEESPLKAIDFGLSAFFKPGEIFGDVVGSPYYVAPEVLRKRYGPEADVWSAGVIIYILLSGVPPFWGESEQDIFEAILHSELDFSSDPWPAISESAKDLVRKILVRDPTKRMTAYEVLRHPWIHVDGAAPDKPLDSA…
GmCPK20		Glyma10g11020.1	MGNNCVGPNVGNGFLQSVTAAVWKTRPPENRLPPPNAEAKAPGGSAPSTATTTTNTADSSKSPEPPPGMPVQSTPPEPVKMPAAAADAAKPLPLKPEKPASSHAMEPVPGGGDNNHQTKKPTHLKRVSSVGLQVESVLGRKTENMKEFFSLGRKLGQGQFGTTFLCVQKGTNKDFACKSIAKRKLTTQEDVEDVRREIQIMHHLAGHPNVIQIVGAYEDAVAVHVVMELCAGGELFDRIIQRGHYTERKAAELARLILNVVEACHSLGVMHRDLKPENFLFINHEEESPLKTIDFGLSVFFRPGETFTDVVGSPYYVAPEVLRKQYGPECDVWSAGVIIYILLSGVPPFWDETEQGIFEQVLKGELDFISEPWPSISESAKDLVRRMLIRDPKKRMTAH…
GmCPK21		Glyma10g23620.2	MGNTCVGPSISKNGFVQSVSAAIWRSQLPEGSVSNRESVKEEATSVPESPLPVQNKPPEQITMPKQEAKQEGKSEIEPEKEQDKKKQKKRGSVKRVSSAGLRVDSVLQRETDNFKEFFTLGRKLGQGQFGTTFLCVEKATGQEYACKSIAKRKLVTDDDVEDVRREIQIMHHLAGHPNVISIKGAYEDAVAVHVVMELCAGGELFDRIIQRGHYTERQAAKLTKTIVGVVEACHSLGVMHRDLKPENFLFVNQHEDSLLKTIDFGLSVFFKPGDIFNDVVGSPYYVAPDVLRKRYGPEADVWSAGVILYILLSGVPPFWAENEQGIFEQVLRGDLDFSSDPWPSISESAKDLVRKMLVRDPRRRLTAHQVLCHPWIQVDGVAPDKPLDSAVLSRLKQFS…
GmCPK22		Glyma10g36100.1	MQKHGFASKRNVLPYQTPRLRDHYVLGKKLGQGQFGTTYLCTHKVTGKLYACKSIPKRKLLCQEDYDDVWREIQIMHHLSEHPNVVQIQGTYEDSVFVHLVMELCAGGELFDRIIQKGHYSEKEAAKLIKTIVGVVEACHSLGVMHRDLKPENFLFDTPGEDAQMKATDFGLSVFHKPGQAFHDVVGSPYYVAPEVLCKQYGPEVDVWSAGVILYILLSGVPPFWAETEAGIFRQILNGDLDFVSEPWPSISENAKELVKKMLDRDPKKRISAHEVLCNPWIVDDIAPDKPLDSAVLTRLKLFSAMNKLKKMALRVIAERLSEEEIGGLKELFKMIDTDNSGTITFEELKAGLKSVGSNLMESEIKSLMEAADIDNNGSIDYGEFLAATLHLNKMEREE…
GmCPK23		Glyma11g02260.1	MGNCNSEPSSQTQPHSDHHHHHPQPSNGITVLPPNSKPSVGRVLGRPMEDARSTYTFGRELGRGQFGVTYQVTHKHTKQQFACKSIATRKLVHRDDLEDVRREVQIMHHLTGHRNIVELKGAYEDRHSVNLIMELCGGGELFDRIIAKGHYSERAAADLCRQIVTVVHDCHTMGVMHRDLKPENFLFLSKDENSPLKATDFGLSVFFKPGDVFKDLVGSAYYVAPEVLRRSYGPGADIWSAGVILFILLSGVPPFWSEKEQGIFDAILRGHIDFASDPWPSISSSAKDLVKKMLRADPKQRLSAVEVLNHPWMREDGASDKPLDVAVLSRMKQFRAMNKLKKVALKVIAENLSEEEIIGLKEMFKSMDTDNSGTITFEELKAGLPKLGTKVSESEVRQL…
GmCPK24		Glyma11g08180.1	MGICFSATKVSGSSSNNAAASNRNRKGLAAPAPAPPAQPELEPVTGKQKKQPSQAKRRQVPEDSQKNPRSKDKAGARRQGTHVPCGKRTDFGYEKDFENRFSLGKLLGHGQFGYTYVGIDKTNGDRVAVKRLEKSKMVLPIAVEDVKREVKILKELTGHENVVQFHNAFDDESYVYIVMELCEGGELLDRILAKKDSRYTEKDAAVVVRQMLKVAAECHLHGLVHRDMKPENFLFKSTKEDSPLKATDFGLSDFIKPGKRFQDIVGSAYYVAPEVLKRKSGPESDVWSIGVITYILLCGRRPFWDKTEDGIFKEVLRNKPDFRRKPWPTISNAAKDFVKKLLVKDPRARYTAAQALSHPWVREGGEALEIPIDISVLNNMRQFVKYSRLKQFALRALAS…
GmCPK25		Glyma11g13740.1	MGSCISTQAVRTRKRSRSPNHKPSTPRGRGHEVARRSSVAARRSSVTARPLNVVSGPSPGNIFDKYQFGKELGRGEFGVTHRVVDVESGEAFACKKISKTKLRTEIDVQDVRREVQIMRHLPQHPNIVAFKEAYEDKDAVYLVMELCEGGELFDRIVAKGHYTERAAANVVKTILEVCKVCHEHGVIHRDLKPENFLFADTSESAPLKSIDFGLSTFYESGERFSEIVGSPYYMAPEVLRRNYGQEIDVWSTGVILYILLCGVPPFWAESEEGIAQAIIRGKVDFTRDPWPKVSDEAKHLVKRMLDPNPFTRITVQEVLDNSWIQNREHGRTISLGDQVRMRIKQFSLMNRFKRKVLRVVADNLSDEQIDVFKQMFNMMDKDKNGNLSFEELRDGLSMI…
GmCPK26		Glyma12g05730.1	MGSCISTQGVRTRKRSRSKNYKPSTPRGHEPARRSSVTARPLNVVSGPSPGNIFDKYQFGKELGRGEFGVTHRIVDVESGEAFACKTIAKTKLRTEIDVQDVRREVQIMRHLPQHPNIVAFKEAYEDKDAVYLVMELCEGGELFDRIVAKGHYTERAAADVAKTILEVCKVCHEHGVIHRDLKPENFLFADSSETAPLKSIDFGLSTFYVSGERFSEIVGSPYYMAPEVLRRNYGPEIDVWSAGVILYILLCGVPPFWAESEEGIAQAIIRGKVDFTRDPWPKVSDEAKHLVKRMLDPNPFTRITVQEVLDNSWIQNREHGRTISLGDQVRMRIKQFSLMNRFKRKVLRVVADNLSDEQVDVFKQMFDMMDKDKNGNLSFEELRDGLSMIGHAIPDPDV…
GmCPK27		Glyma14g02680.1	MGCCLSKKGSEPEEHIGYRHVAGAGGAGVYNNHKSHEPFATQTKPPPHQPYQLPEKHAPPQAPWRPPPSPKHVHNHDTITGKPFEDVKQHYTLGKELGRGQFGVTYLCTENSTGLQYACKSISRRKLVSRADKEDMKREIQIMQHLSGQSNIVEFKGAFEDKQSVHVVMELCAGGELFDRIIAKGHYSERAAASICRQIVKVVNTCHFMGVIHRDLKPENFLLSSKDDKGLLKATDFGLSVFIEEGKVYRNIVGSAYYVAPEVLRRSYGKEADIWSAGVILYILLSGVPPFWAETEKGIFDAILQGHIDFESSPWPSISNSAKDLVRKMLIKDPKKRITASQVLEHPWLKEGGNASDKPIDSAVLSRMKQFRAMNKLKKLALKVIAENLSEEEIQGLKA…
GmCPK28		Glyma14g04010.1	MGNCCSGGTNDTEDKGESNQPTNNNNGGGGGGTTAPATTPPPSSKPNHPPSKHSKPPAIGPVLGRPMEDVKSTYSMGKELGRGQFGVTHLCTHKSTGKQYACKTIAKRKLVNKEDIEDVKREVQIMHHLSGQPNIVELVNVYEDKQSVHLVMELCAGGELFDRIIAKGHYTERAAASLLRTIVQIVHTFHSMGVIHRDLKPENFLLLNKDENAPLKATDFGLSVFYKQGEMFKDIVGSAYYIAPEVLKRKYGPEVDIWSIGVMLYILLCGVPPFWAESENGIFNAILRGHIDFTSDPWPSISPAAKDLVRKMLHSDPRQRLTSYEVLNHPWIKEDGEAPDTPLDNAVLNRLKQFRAMNQFKKVALRVIAGCLSEEEIMGLKQMFKGMDTDNSGTITIEE…
GmCPK29		Glyma14g00320.2	MGNTCRGSLKGKYIQGFSQPEDHSKRSTTHSDPSSTKQQDDNDNNNNNNNNNNNNNNNNNNLPFNAKREAIMRRGLDNQAYYVLGHKTPNIRDLYTLGRKLGQGQFGTTYLCTENSTSIEYACKSISKRKLISKEDVEDVRREIQIMHHLAGHKNIVTIKGAYEDPLYVHIVMELCSGGELFDRIIQRGHYTERKAAELTKIIVGVVEACHSLGVMHRDLKPENFLLVNKDDDFSLKAIDFGLSVFFKPGQVFTDVVGSPYYVAPEVLLKHYGPEADVWTAGVILYILLSGVPPFWAETQQGIFDAVLKGHIDFDSDPWPLISDSGKDLIRKMLCSQPSERLTAHQVLCHPWICENGVAPDRSLDPAVLSRLKQFSAMNKLKKMALRVIAESLSEEEIA…
GmCPK30		Glyma14g40090.1	MGLGMFKALFCCSKPHEIDIADSWDSSPDHTPKQHSKPKPKPNAAPTHSNNKQTTTSTQIGAILGKPYVNIHQMYEMKKELGSGQSGVTYLCVEKTTKREYACKSISRSKLLSTQEIEDVRREVMILQHLSGQPNIVEFRGAYEDKQNVHLVMELCSGGELFDRIIAKGNYSEREAATVMRQIVNVVHVCHFMGVMHRDLKPENFLLATNHPDAAVKATDFGLSIFIEEGIVYREIVGSAYYVAPEVLKRNYGKEIDVWSAGIILYILLSGVPPFWGENERSIFEAILGGKLDLESAPWPSISAAAKDLIRKMLNNDPKKRITAAEALEHPWMKEGGEASDKPLDNAVLTRMKQFRAMNKMKKLALKVIAENLSEEEIKGLKQMFNNMDTDRSGTITFE…
GmCPK31		Glyma16g23870.3	MSREGYHPNPVPFSLSHSKRFRPSPTMGTCFSATKVSGSHGNAVTVNKNRKGAAKPKSETATANPLRHKASSRHVPCGKRTDFGYEKDFDQRYSLGKLLGHGQFGYTYVGIDKANGDRVAVKRLEKSKMVLPIAVEDVKREVKILKALTGHENVVQFYNAFEDGSYVYIVMELCEGGELLDRILAKKDSRYTERDAAVVVRQMLKVAAECHLHGLVHRDMKPENFLFKSTKEDSPLKATDFGLSDFIKPGKKFHDIVGSAYYVAPEVLKRKSGPQSDVWSIGVITYILLCGRRPFWDKTEDGIFKEVLRKKPDFRRKPWPTISNAAKDFVKKLLVKDPRARLTAAQALSHPWVREGGEALEIPIDISVLSNMRQFVKYSRFKQFALRALASTLNEEELA…
GmCPK32		Glyma17g01730.1	MGCQGSKEKKSKTEFTTSYGSAATGSGGGTSYNTVQPPPPPPPPTTTATTTNQVQTSAAPKPQSKASPTVQQKADTRILGKPFDDIKKYYSLGKELGRGQFGITYLCTDNASGGTYACKSILKRKLVSKADREDMKREIQIMQHLSGQPNIVEFKGAYEDRFSVHLVMELCAGGELFDRIIAQGHYSERAASSLCRSIVNVVHICHFMGVMHRDLKPENFLLSSKDDHATLKATDFGLSVFIEQGKVYHDMVGSAYYVAPEVLRRSYGKEIDIWSAGIILYILLSGVPPFWAETEKGIFNAILEGEIDFVSEPWPSISDSAKDLVRKMLTQDPNKRITSSQVLEHPWMREGGDASDKPIDSAVLSRMKQFRAMNKLKKLALKVIAENLSEEEIKGLKAM…
GmCPK33		Glyma17g10410.1	MGNCNACVRVDDVADSNRGKNKNNKKTKPNPYAEEEIRSGVPIRVLKDVTSRSLIGDKYVIGRELGRGEFGITYLCTDRETKQELACKSISKRKLRTAIDVEDVRREVAIMSTLPEHANVVKLKATYEDEENVHLVMELCAGGELFDRIVARGHYSERAAAYVARTIAEVVRMCHANGVMHRDLKPENFLFANKKENSVLKAIDFGLSVFFKPGERFSEIVGSPYYMAPEVLKRNYGPEVDVWSAGVILYILLCGVPPFWSEDERGVALAILRGVIDFKREPWPQISDSAKSLVRQMLEPDPKKRLTAEQVLEHSWLQNAKKASNVPLGDIVRTRLKQFSVMNRFKKRALRVIAEHLSVEEVEIIKDMFTLMDTDKDGKVTYEELKVGLRKVGSQLAEP…
GmCPK34		Glyma17g38040.1	MILFFVSEDHPIPYPNPKATQLSLFTNFIFSFFFFSTSQTLKLKISYMTKYYICVHKETLLFDMGICLSKSNTNEIPFNYDHSPPYHHYQPRRTQQPQQPRYPYHNPNSDPSQSIAPSSSFGDQQARILDKPYFDINVLYTLERELGRDEISITRLCTEKTTRRKYACESIPKQKLSKKKHIDDTKRQVLILQHLSGQPNIVEFKVAYEDRQNVHLVMELCLGGTLFDRITAKGSYSESEAASIFRQIVNVVHACHFMGVMHRDLKPENFLLASKDPKAPLKATNFGLSVFIEEGKVYKEIVGSAYYMAPEVLNRNYGKEIDVWSAGIILYILLSGVPPFWGENDRSIFESILGGQLDLESAPWPSISAAAKDLIRKMLNYDPKKRITAVEALEHPWMK…
GmCPK35		Glyma17g38050.2	MKMGVGFSKVLTKKPEHEIPINASPDYTPQLTYKQPRKNLLIAPPLPLPPPKPTECCSQTEPVLGKPYVKIKQMYEMKEELGRGKFGVTYLCVEKATGRAYACKSIAKKKPPQEMEDVRMEVVILQHLSEQHNIVEFKGAYEDRKNVHLVMELCSGGELFDRIVAKGNYTERQAAKIMRQIVNVVHVCHFMGVMHRDLKPENFLFATKDEDAPLKLTDFGSSVFFHKGKVCTDFVGNAYYVAPEVLKRSHGKEIDVWNAGVILYILLSGVPPFWAETEKGIFDAILGGKLDMDSEPWPSISEAAKDLVRKMLTCDPKERITAADALEHPWLKEGGEASDKLPDSAVLIRMKRFRAMNQMKKLALKVIAENISEKETKGLIQMFNNMDTDGSGTITFEEL…
GmCPK36		Glyma18g11030.3	MGCCVSKDSEPQHNGYRHGGTGGVHNQKTHEPLVNQSRAPANQPYHLPEKHAASTAQTVPQNMPWKPSGPALSPKPVVSVRQDTILGKQFEDVKQFYTLGKELGRGQFGVTYLCTENSTGLQYACKSISKRKLVKKSDKEDIKREIQIMQHLSGQPNIVEFKGAYEDRNSVHVVMELCAGGELFDRIIAKGHYSERAAASICRQIVNVVHICHFMGVMHRDLKPENFLLSSRDESALLKATDFGLSVFIEEGKLYRDIVGSAYYVAPEVLRRRCGKEIDIWSAGVILYILLSGVPPFWAETEKGIFDAILEGHIDFESQPWPNISNNAKDLVRKMLIQDPKKRITSAQVLEHPWIKDGNASDRPIDSAVLSRMKQFRAMNKLKKLALKVIAENMSAEEI…
GmCPK37		Glyma20g08140.1	MGNCCSQGNVADGPADDSAAANDKGEANQQGSNNHANDNNDNSTNPTTAPTTTSKPPPTVTPPTSKPSKPAAMGPVLGRPMEDVRATYTIGKELGRGQFGVTHLCTNKATGQQFACKTIAKRKLVNKEDIEDVRREVQIMHHLSGQPNIVELKGAYEDKQSVHLVMELCAGGELFDRIIAKGHYTERAAASLLRTIMQIIHTFHSMGVIHRDLKPENFLMLNKDENSPVKATDFGLSVFFKEGETFKDIVGSAYYIAPEVLKRKYGPEVDIWSVGVMLYILLSGVPPFWAESEHGIFNAILRGHVDFTSDPWPSLSSAAKDLVRKMLTTDPKQRLTAQEVLNHPWIKEDGEAPDKPLDNAVLNRLKQFRAMNQFKKVALRVIAGCLSEEEIMGLKEMFR…
GmCPK38		Glyma20g17020.1	MGNTCVGPSISKNGFVQSVSAAIWRSQLPEDSVSNRESVKEEVTNVPESPLPVQNKPPEQITMPKPEAKQEGKSEIEPEQDKKKQKKRGSVKRVSSAGLRVDSVLQRETDNFKEFFTLGRKLGQGQFGTTFLCVEKATGQEYACKSIAKRKLVTDDDVEDVRREIQIMHHLAGHPNVISIKGAYEDAMAVHVVMELCAGGELFDRIIQRGHYTERQAAELTRTIVGVVEACHSLGVMHRDLKPENFLFINQHEDSLLKTIDFGLSVFFKPGDIFNDVVGSPYYVAPEVLRKRYGPEADVWSAGVILYILLSGVPPFWAENEQGIFEQVLRGDLDFSSDPWPSISESAKDLVRKMLVRDPRRRLTAHQVLCHPWIQVDGVAPDKPLDSAVLSRLKQFSAM…
GmCPK39		Glyma20g31510.1	MQKHGFASKRNVLPYQTARLRDHYVLGKKLGQGQFGTTYLCTHKVTGKLYACKSIPKRKLMCQEDYDDVWREIQIMHHLSEHPNVVQIQGTYEDSVFVHLVMELCAGGELFDRIIQKGHYSEREAAKLIKTIVGVVEACHSLGVMHRDLKPENFLFDTPGEDAQMKATDFGLSVFYKPGQAFHDVVGSPYYVAPEVLCKQYGPEVDVWSAGVILYILLSGVPPFWAETEAGIFRQILNGDLDFVSEPWPSISENAKELFYVSSFSTKCNPWVVDDIAPDKPLDSAVLTRLKHFSAMNKLKKMALRVIAERLSEEEIGGLKELFKMIDTDNSGTITFEELKEGLKSVGSNLMESEIKSLMEAADIDNNGSIDYGEFLAATLHLNKMEREENLVAAFAYFD…

## Sheet: Table.1
PvGene Name	Arabidopsis ortholog locus	Phytozome ID	Chr Name	Strand	Gene Start (bp)	Gene End (bp)
PvCDPK1.1	AT5G04870 (AtCPK1)	Phvul.001G197700.1	PvChr01	forward	45693570	45697541
PvCDPK1.2	AT5G04870 (AtCPK1)	Phvul.007G233900.1	PvChr07	forward	35767288	35774697
PvCDPK2	AT3G10660 (AtCPK2)	Phvul.007G266100.1	PvChr07	reverse	38724008	38729058
PvCDPK3.1	AT4G23650 (AtCPK3)	Phvul.002G161200.1	PvChr02	reverse	31597834	31604224
PvCDPK3.2	AT4G23650 (AtCPK3)	Phvul.002G294500.1	PvChr02	reverse	46343902	46352694
PvCDPK4.1	AT4G09570 (AtCPK4)	Phvul.007G089200.1	PvChr07	forward	9217140	9221899
PvCDPK4.2	AT4G09570 (AtCPK4)	Phvul.007G089301.1	PvChr07	forward	9223593	9231935
PvCDPK6	AT2G17290 (AtCPK6)	Phvul.008G292500.1	PvChr08	forward	62964859	62973752
PvCDPK8	AT5G19450 (AtCPK8)	Phvul.007G253300.1	PvChr07	reverse	37518913	37524077
PvCDPK9	AT3G20410 (AtCPK9)	Phvul.008G266600.1	PvChr08	reverse	61203175	61207570
PvCDPK10.1	AT1G18890 (AtCPK10)	Phvul.003G194100.1	PvChr03	reverse	41784590	41788241
PvCDPK10.2	AT1G18890 (AtCPK10)	Phvul.009G190566.1	PvChr09	reverse	28940689	28945605
PvCDPK11.1	AT1G35670 (AtCPK11)	Phvul.002G279300.1	PvChr02	forward	44866006	44871378
PvCDPK11.2	AT1G35670 (AtCPK11)	Phvul.009G160100.1	PvChr09	reverse	23666550	23672870
PvCDPK13	AT3G51850 (AtCPK13)	Phvul.008G098400.1	PvChr08	forward	10295962	10304546
PvCDPK16	AT2G17890 (AtCPK16)	Phvul.002G108700.1	PvChr02	reverse	23210281	23216106
PvCDPK17.1	AT5G12180 (AtCPK17)	Phvul.006G015300.1	PvChr06	forward	7024909	7028768
PvCDPK17.2	AT5G12180 (AtCPK17)	Phvul.008G201900.1	PvChr08	forward	54865627	54868891
PvCDPK20	AT2G38910 (AtCPK20)	Phvul.007G265100.1	PvChr07	reverse	38623002	38629456
PvCDPK21	AT4G04720 (AtCPK21)	Phvul.003G078400.1	PvChr03	forward	12570425	12575047
PvCDPK24	AT2G31500 (AtCPK24)	Phvul.011G055400.1	PvChr11	forward	4877733	4881802
PvCDPK28	AT5G66210 (AtCPK28)	Phvul.003G261700.1	PvChr03	reverse	50115856	50126462
PvCDPK29.1	AT1G76040 (AtCPK29)	Phvul.001G002800.2	PvChr01	forward	165997	170716
PvCDPK29.2	AT1G76040 (AtCPK29)	Phvul.001G002900.1	PvChr01	forward	171533	174640
PvCDPK32	AT3G57530 (AtCPK32)	Phvul.001G135300.1	PvChr01	reverse	37388614	37393061

## Sheet: Table.2
PvGene Name	aa No	MW (kDa)	pI	EF-hand No	N- myrist	N- Palmit	Localization
PvCDPK1.1	575	64.5548	5.09	3	No	Yes	chlo
PvCDPK1.2	581	64.9948	5.28	4	No	Yes	chlo
PvCDPK2	582	65.1331	5.8	4	No	Yes	chlo
PvCDPK3.1	502	56.7075	6.05	4	Yes	Yes	chlo
PvCDPK3.2	519	58.2824	5.9	4	Yes	Yes	mito
PvCDPK4.1	491	55.1593	5.43	4	No	Yes	mito
PvCDPK4.2	298	33.428	4.82	4	No	Yes	cyto
PvCDPK6	562	63.0132	5.57	4	No	Yes	nucl
PvCDPK8	516	58.6772	6.5	2	No	Yes	chlo, mito
PvCDPK9	525	59.097	6.3	4	Yes	Yes	cyto
PvCDPK10.1	537	60.8947	5.96	4	No	Yes	cyto
PvCDPK10.2	550	61.993	6.09	4	No	Yes	cyto
PvCDPK11.1	505	56.9336	5.24	4	No	Yes	chlo
PvCDPK11.2	496	55.7634	5.32	4	No	Yes	pero
PvCDPK13	531	59.7612	5.86	3	No	Yes	cyto
PvCDPK16	569	64.6907	9.21	4	Yes	Yes	chlo
PvCDPK17.1	544	60.5382	5.09	4	Yes	Yes	cyto
PvCDPK17.2	521	58.4913	5.58	4	Yes	Yes	cyto
PvCDPK20	582	64.7876	5.35	4	No	Yes	chlo
PvCDPK21	546	60.724	5.76	4	Yes	Yes	cyto
PvCDPK24	539	61.0698	6.46	4	Yes	Yes	chlo
PvCDPK28	527	59.7214	8.92	4	No	Yes	chlo
PvCDPK29.1	527	60.1808	6.11	4	Yes	Yes	cyto_nucl
PvCDPK29.2	511	57.7652	5.64	2	No	Yes	cyto
PvCDPK32	538	60.9804	6.29	3	No	Yes	cyto

## Sheet: Protein_Features
PvGene Name	Phytozome ID	Amino Acid Number	Molecular Weight	pI	WolfPsort
PvCDPK1.1	Phvul.001G197700.1	575	64554.8	5.09	chlo: 10, cyto: 2, plas: 1, extr: 1
PvCDPK1.2	Phvul.007G233900.1	581	64994.8	5.28	chlo: 9, cyto: 2, nucl: 1, mito: 1, pero: 1
PvCDPK2	Phvul.007G266100.1	582	65133.1	5.8	chlo: 6, nucl: 3, cyto: 2, mito: 2, plas: 1
PvCDPK3.1	Phvul.002G161200.1	502	56707.5	6.05	chlo: 5, E.R.: 3, nucl: 2, cyto: 1, mito: 1, vacu: 1, golg: 1
PvCDPK3.2	Phvul.002G294500.1	519	58282.3	5.9	mito: 3.5, mito_plas: 2.5, chlo: 2, nucl: 2, cyto: 2, pero: 2, vacu: 1, cysk: 1
PvCDPK4.1	Phvul.007G089200.1	491	55159.3	5.43	mito: 6, chlo: 4, cyto: 1, plas: 1, E.R.: 1, golg: 1
PvCDPK4.2	Phvul.007G089301.1	298	33428	4.82	cyto: 4, nucl: 3, chlo: 2, mito: 1, plas: 1, pero: 1, cysk: 1, golg: 1
PvCDPK6	Phvul.008G292500.1	562	63013.2	5.57	nucl: 5, mito: 3, cyto: 2, chlo: 1, plas: 1, pero: 1, cysk: 1
PvCDPK8	Phvul.007G253300.1	516	58677.2	6.5	chlo: 4, mito: 4, cyto_nucl: 3, nucl: 2.5, cyto: 2.5, golg: 1
PvCDPK9	Phvul.008G266600.1	525	59097	6.3	cyto: 6, E.R.: 4, nucl: 2, vacu: 2
PvCDPK10.1	Phvul.003G194100.1	537	60894.7	5.96	cyto: 7, E.R.: 3, vacu: 2, nucl: 1, golg: 1
PvCDPK10.2	Phvul.009G190566.1	550	61993	6.09	cyto: 6, E.R.: 4, vacu: 2, nucl: 1, pero: 1
PvCDPK11.1	Phvul.002G279300.1	505	56933.6	5.24	chlo: 11, nucl: 1, cyto: 1, mito: 1
PvCDPK11.2	Phvul.009G160100.1	496	55763.4	5.32	pero: 5, mito: 4, cyto: 3, nucl: 2
PvCDPK13	Phvul.008G098400.1	531	59761.2	5.86	cyto: 7.5, cyto_nucl: 4.5, E.R.: 2, chlo: 1, mito: 1, pero: 1, golg: 1
PvCDPK16	Phvul.002G108700.1	569	64690.7	9.21	chlo: 13.5, chlo_mito: 7.5
PvCDPK17.1	Phvul.006G015300.1	544	60538.2	5.09	cyto: 5.5, cyto_pero: 3.5, nucl: 2, vacu: 2, E.R.: 2, mito: 1, plas: 1
PvCDPK17.2	Phvul.008G201900.1	521	58491.3	5.58	cyto: 6.5, cyto_pero: 4, nucl: 2, vacu: 2, E.R.: 2, mito: 1
PvCDPK20	Phvul.007G265100.1	582	64787.6	5.35	chlo: 5, cyto: 4, nucl: 2, plas: 1.5, mito_plas: 1.5, pero: 1
PvCDPK21	Phvul.003G078400.1	546	60724	5.76	cyto: 4.5, nucl: 3, cyto_pero: 3, mito: 2, vacu: 2, E.R.: 2
PvCDPK24	Phvul.011G055400.1	539	61069.8	6.46	chlo: 5, mito: 2, plas: 2, cyto: 1.5, cyto_nucl: 1.5, E.R.: 1, pero: 1, golg: 1
PvCDPK28	Phvul.003G261700.1	527	59721.4	8.92	chlo: 11, mito: 2, pero: 1
PvCDPK29.1	Phvul.001G002800.2	527	60180.8	6.11	cyto_nucl: 4, nucl: 3.5, cyto: 3.5, chlo: 2, golg: 2, plas: 1, vacu: 1, pero: 1
PvCDPK29.2	Phvul.001G002900.1	511	57765.2	5.64	cyto: 8, mito: 4, chlo: 1, pero: 1
PvCDPK32	Phvul.001G135300.1	538	60980.4	6.29	cyto: 6, E.R.: 3, nucl: 2, plas: 1, vacu: 1, golg: 1

## Sheet: Motifs
MOTIF ID		ALT ID	WIDTH	BEST POSSIBLE MATCH	DOMAIN
Motif-1	FSDIVGSPYYVAPEVLKRNYGPEVDVWSAGVILYILLSGVPPFWAETEQG	MEME-1	50	FHDIVGSPYYVAPEVLRRNYGPEVDVWSAGVILYILLCGVPPFWAETEQG
Motif-2	EEEEJKELFEAFDTDNSGTITYEEFKAAL	MEME-2	29	EEEHLKQMFQYFDTDNSGYITYEEFQAMM
Motif-3	EVQIMHHLSGHPNIVELKGAYEDRSSVHLVMELCAGGELFDRIIAKGHYS	MEME-3	50	EVQIMHHLPGHPNIVQFKGAYEDRHSVHLVMELCAGGELFDRIIARGHYT
Motif-4	RTIVEVVEACHSLGVMHRDLKPENFLFANKDEBSPLKATDFGLSVFFKPG	MEME-4	50	RTIVEVVHMCHSMGVMHRDLKPENFLFANKDENSPLKATDFGLSVFFKPG
Motif-5	FDAILRGKJDFKSEPWPSISDSAKDLVRKMLVRDPKKRJTAHZVLEHPWJ	MEME-5	50	FQQILRGHIDFTSEPWPSISDSAKDLVRKMLTPDPKKRLTAHQVLCHPWI
Motif-6	ERYTLGRELGRGQFGVTYLCTDKATGEZYACKSISKRKLVTKEDVEDVRR	MEME-6	50	DRYTLGRELGQGQFGTTYLCTHKATGEQYACKSISKRKLVTKEDVEDVWR
Motif-7	DGEAPDKPLDSAVLSRLKQFSAMNKLKKMALRVIAENLSEE	MEME-7	41	DGEAPDKPLDSAVLSRMKQFSAMNKLKKMALRVIAENLSEE
Motif-8	KTGTDWRKASRQYSRERFKSLSLNLMKDG	MEME-8	29	KTGTDWRKASRQYSRERFNSLSLNLMKDG
Motif-9	MGNCCSGP	MEME-9	8	MGNCCSCP
Motif-10	ERAAAKLA	MEME-10	8	ERAAASLC

## Sheet: Ka-Ks
Gene1	Gene2	Ka	Ks	Ka/Ks	MYA	Duplication Type
PvCDPK1.1	PvCDPK2	0.173598	0.644307	0.269434	49.1088	Segmental
PvCDPK3.1	PvCDPK3.2	0.0908058	0.642129	0.141414	48.9427	Segmental
PvCDPK8	PvCDPK32	0.0972741	0.807787	0.12042	61.5691	Segmental
PvCDPK10.1	PvCDPK10.2	0.0685293	0.856711	0.0799912	65.2981	Segmental
PvCDPK11.1	PvCDPK11.2	0.0837874	0.737257	0.113647	56.1934	Segmental
PvCDPK17.1	PvCDPK17.2	0.090138	0.689015	0.130822	52.5164	Segmental
PvCDPK4.1	PvCDPK4.2	0.117261	0.420956	0.278559	32.085	Tandem
PvCDPK29.1	PvCDPK29.2	0.247145	1.1145	0.221754	84.9469	Tandem

## Sheet: Cis_Acting1
Gene	Start	End	Element	Description
PvCDPK1.1	559	567	TATA
PvCDPK1.1	1166	1174	TATA
PvCDPK1.1	265	273	chs-CMA1a	part of a light responsive element
PvCDPK1.1	1548	1555	AAGAA-motif
PvCDPK1.1	218	228	Unnamed__6
PvCDPK1.1	1131	1140	WUN-motif
PvCDPK1.1	1245	1251	CCGTCC motif
PvCDPK1.1	242	248	G-box	cis-acting regulatory element involved in light responsiveness
PvCDPK1.1	1885	1891	G-box	cis-acting regulatory element involved in light responsiveness
PvCDPK1.1	216	222	AT~TATA-box
PvCDPK1.1	1023	1029	AT~TATA-box
PvCDPK1.1	1120	1126	AT~TATA-box
PvCDPK1.1	1196	1202	AT~TATA-box
PvCDPK1.1	1444	1450	AT~TATA-box
PvCDPK1.1	1961	1967	TCT-motif	part of a light responsive element
PvCDPK1.1	945	955	GATA-motif	part of a light responsive element
PvCDPK1.1	1662	1671	ATCT-motif	part of a conserved DNA module involved in light responsiveness
PvCDPK1.1	1258	1264	WRE3
PvCDPK1.1	698	709	Box III	protein binding site
PvCDPK1.1	1575	1586	Box III	protein binding site
PvCDPK1.1	444	453	TCA-element	cis-acting element involved in salicylic acid responsiveness
PvCDPK1.1	6	11	STRE
PvCDPK1.1	670	674		short_function
PvCDPK1.1	784	788		short_function
PvCDPK1.1	1254	1258		short_function
PvCDPK1.1	1315	1319		short_function
PvCDPK1.1	1491	1495		short_function
PvCDPK1.1	1545	1549		short_function
PvCDPK1.1	1858	1862		short_function
PvCDPK1.1	1880	1884		short_function
PvCDPK1.1	1309	1315	MYC
PvCDPK1.1	1425	1432	P-box	gibberellin-responsive element
PvCDPK1.1	1271	1280	Box II	part of a light responsive element
PvCDPK1.1	1182	1191	AT-rich sequence	element for maximal elicitor-mediated activation (2copies)
PvCDPK1.1	1402	1409	MRE	MYB binding site involved in light responsiveness
PvCDPK1.1	576	582	G-Box	cis-acting regulatory element involved in light responsiveness
PvCDPK1.1	1885	1891	G-Box	cis-acting regulatory element involved in light responsiveness
PvCDPK1.1	242	248	ABRE4
PvCDPK1.1	57	62	CAAT-box	common cis-acting element in promoter and enhancer regions
PvCDPK1.1	82	87	CAAT-box	common cis-acting element in promoter and enhancer regions
PvCDPK1.1	94	99	CAAT-box	common cis-acting element in promoter and enhancer regions
PvCDPK1.1	97	101	CAAT-box
PvCDPK1.1	103	107	CAAT-box
PvCDPK1.1	162	166	CAAT-box
PvCDPK1.1	334	338	CAAT-box
PvCDPK1.1	364	368	CAAT-box
PvCDPK1.1	403	407	CAAT-box
PvCDPK1.1	551	555	CAAT-box
PvCDPK1.1	692	697	CAAT-box	common cis-acting element in promoter and enhancer regions
PvCDPK1.1	706	710	CAAT-box
PvCDPK1.1	746	750	CAAT-box
PvCDPK1.1	770	774	CAAT-box
PvCDPK1.1	794	798	CAAT-box
PvCDPK1.1	815	819	CAAT-box
PvCDPK1.1	820	824	CAAT-box
PvCDPK1.1	849	853	CAAT-box
PvCDPK1.1	863	867	CAAT-box
PvCDPK1.1	985	989	CAAT-box
PvCDPK1.1	1225	1229	CAAT-box
PvCDPK1.1	1279	1284	CAAT-box	common cis-acting element in promoter and enhancer regions
PvCDPK1.1	1310	1315	CAAT-box	common cis-acting element in promoter and enhancer regions
PvCDPK1.1	1453	1458	CAAT-box	common cis-acting element in promoter and enhancer regions
PvCDPK1.1	1513	1517	CAAT-box
PvCDPK1.1	1656	1660	CAAT-box
PvCDPK1.1	1661	1665	CAAT-box
PvCDPK1.1	1855	1860	CAAT-box	common cis-acting element in promoter and enhancer regions
PvCDPK1.1	242	248	ABRE3a
PvCDPK1.1	631	638	TCCC-motif	part of a light responsive element
PvCDPK1.1	79	83	TATA-box	core promoter element around -30 of transcription start
PvCDPK1.1	119	127	TATA-box	core promoter element around -30 of transcription start
PvCDPK1.1	157	163	TATA-box	core promoter element around -30 of transcription start
PvCDPK1.1	158	162	TATA-box	core promoter element around -30 of transcription start
PvCDPK1.1	214	220	TATA-box	core promoter element around -30 of transcription start
PvCDPK1.1	215	222	TATA-box	core promoter element around -30 of transcription start
PvCDPK1.1	216	222	TATA-box	core promoter element around -30 of transcription start
PvCDPK1.1	217	223	TATA-box	core promoter element around -30 of transcription start
PvCDPK1.1	218	222	TATA-box	core promoter element around -30 of transcription start
PvCDPK1.1	325	330	TATA-box	core promoter element around -30 of transcription start
PvCDPK1.1	326	330	TATA-box	core promoter element around -30 of transcription start
PvCDPK1.1	470	475	TATA-box	core promoter element around -30 of transcription start
PvCDPK1.1	471	475	TATA-box	core promoter element around -30 of transcription start
PvCDPK1.1	481	489	TATA-box	core promoter element around -30 of transcription start
PvCDPK1.1	537	545	TATA-box	core promoter element around -30 of transcription start
PvCDPK1.1	560	567	TATA-box	core promoter element around -30 of transcription start
PvCDPK1.1	561	567	TATA-box	core promoter element around -30 of transcription start
PvCDPK1.1	562	567	TATA-box	core promoter element around -30 of transcription start
PvCDPK1.1	563	567	TATA-box	core promoter element around -30 of transcription start
PvCDPK1.1	662	670	TATA-box	core promoter element around -30 of transcription start
PvCDPK1.1	824	832	TATA-box	core promoter element around -30 of transcription start
PvCDPK1.1	858	864	TATA-box	core promoter element around -30 of transcription start
PvCDPK1.1	859	864	TATA-box	core promoter element around -30 of transcription start
PvCDPK1.1	860	864	TATA-box	core promoter element around -30 of transcription start
PvCDPK1.1	898	904	TATA-box	core promoter element around -30 of transcription start
PvCDPK1.1	899	904	TATA-box	core promoter element around -30 of transcription start
PvCDPK1.1	900	904	TATA-box	core promoter element around -30 of transcription start
PvCDPK1.1	913	917	TATA-box	core promoter element around -30 of transcription start
PvCDPK1.1	1021	1027	TATA-box	core promoter element around -30 of transcription start
PvCDPK1.1	1022	1029	TATA-box	core promoter element around -30 of transcription start
PvCDPK1.1	1023	1029	TATA-box	core promoter element around -30 of transcription start
PvCDPK1.1	1024	1030	TATA-box	core promoter element around -30 of transcription start
PvCDPK1.1	1025	1029	TATA-box	core promoter element around -30 of transcription start
PvCDPK1.1	1048	1055	TATA-box	core promoter element around -30 of transcription start
PvCDPK1.1	1059	1065	TATA-box	core promoter element around -30 of transcription start
PvCDPK1.1	1060	1072	TATA-box	core promoter element around -30 of transcription start
PvCDPK1.1	1118	1124	TATA-box	core promoter element around -30 of transcription start
PvCDPK1.1	1120	1126	TATA-box	core promoter element around -30 of transcription start
PvCDPK1.1	1121	1127	TATA-box	core promoter element around -30 of transcription start
PvCDPK1.1	1122	1126	TATA-box	core promoter element around -30 of transcription start
PvCDPK1.1	1166	1170	TATA-box	core promoter element around -30 of transcription start
PvCDPK1.1	1195	1201	TATA-box	core promoter element around -30 of transcription start
PvCDPK1.1	1196	1202	TATA-box	core promoter element around -30 of transcription start
PvCDPK1.1	1197	1203	TATA-box	core promoter element around -30 of transcription start
PvCDPK1.1	1198	1202	TATA-box	core promoter element around -30 of transcription start
PvCDPK1.1	1442	1448	TATA-box	core promoter element around -30 of transcription start
PvCDPK1.1	1444	1450	TATA-box	core promoter element around -30 of transcription start
PvCDPK1.1	1445	1451	TATA-box	core promoter element around -30 of transcription start
PvCDPK1.1	1446	1450	TATA-box	core promoter element around -30 of transcription start
PvCDPK1.1	1524	1532	TATA-box	core promoter element around -30 of transcription start
PvCDPK1.1	1590	1594	TATA-box	core promoter element around -30 of transcription start
PvCDPK1.1	1595	1601	TATA-box	core promoter element around -30 of transcription start
PvCDPK1.1	1596	1601	TATA-box	core promoter element around -30 of transcription start
PvCDPK1.1	1597	1601	TATA-box	core promoter element around -30 of transcription start
PvCDPK1.1	1903	1907	TATA-box	core promoter element around -30 of transcription start
PvCDPK1.1	1245	1251	A-box	cis-acting regulatory element
PvCDPK1.1	1359	1365	Myb
PvCDPK1.1	242	250	ABRE	cis-acting element involved in the abscisic acid responsiveness
PvCDPK1.1	243	248	ABRE	cis-acting element involved in the abscisic acid responsiveness
PvCDPK1.1	576	581	ABRE	cis-acting element involved in the abscisic acid responsiveness
PvCDPK1.1	1885	1891	ABRE	cis-acting element involved in the abscisic acid responsiveness
PvCDPK1.1	1886	1891	ABRE	cis-acting element involved in the abscisic acid responsiveness
PvCDPK1.1	1245	1251	CCGTCC-box
PvCDPK1.1	4	8	Unnamed__4
PvCDPK1.1	318	322	Unnamed__4
PvCDPK1.1	606	610	Unnamed__4
PvCDPK1.1	632	636	Unnamed__4
PvCDPK1.1	1005	1009	Unnamed__4
PvCDPK1.1	1303	1307	Unnamed__4
PvCDPK1.1	1322	1326	Unnamed__4
PvCDPK1.1	1374	1378	Unnamed__4
PvCDPK1.1	1378	1382	Unnamed__4
PvCDPK1.1	1554	1558	Unnamed__4
PvCDPK1.1	1723	1727	Unnamed__4
PvCDPK1.1	1860	1864	Unnamed__4
PvCDPK1.1	242	250	AT~ABRE
PvCDPK1.1	289	297	ERE
PvCDPK1.1	530	538	ERE
PvCDPK1.1	1009	1017	ERE
PvCDPK1.1	1084	1090	Box 4	part of a conserved DNA module involved in light responsiveness
PvCDPK1.1	1472	1478	Box 4	part of a conserved DNA module involved in light responsiveness
PvCDPK1.1	1815	1821	Box 4	part of a conserved DNA module involved in light responsiveness
PvCDPK1.1	1486	1493	Myc
PvCDPK1.2	1234	1242	GA-motif	part of a light responsive element
PvCDPK1.2	1706	1714	GA-motif	part of a light responsive element
PvCDPK1.2	1389	1396	Myc
PvCDPK1.2	3	9	Box 4	part of a conserved DNA module involved in light responsiveness
PvCDPK1.2	632	638	Box 4	part of a conserved DNA module involved in light responsiveness
PvCDPK1.2	340	344	Unnamed__4
PvCDPK1.2	407	411	Unnamed__4
PvCDPK1.2	975	979	Unnamed__4
PvCDPK1.2	1256	1260	Unnamed__4
PvCDPK1.2	1387	1396	TC-rich repeats	cis-acting element involved in defense and stress responsiveness
PvCDPK1.2	71	78	TATA-box	core promoter element around -30 of transcription start
PvCDPK1.2	72	78	TATA-box	core promoter element around -30 of transcription start
PvCDPK1.2	73	80	TATA-box	core promoter element around -30 of transcription start
PvCDPK1.2	74	80	TATA-box	core promoter element around -30 of transcription start
PvCDPK1.2	75	81	TATA-box	core promoter element around -30 of transcription start
PvCDPK1.2	76	82	TATA-box	core promoter element around -30 of transcription start
PvCDPK1.2	77	83	TATA-box	core promoter element around -30 of transcription start
PvCDPK1.2	78	82	TATA-box	core promoter element around -30 of transcription start
PvCDPK1.2	176	180	TATA-box	core promoter element around -30 of transcription start
PvCDPK1.2	188	195	TATA-box	core promoter element around -30 of transcription start
PvCDPK1.2	189	195	TATA-box	core promoter element around -30 of transcription start
PvCDPK1.2	190	195	TATA-box	core promoter element around -30 of transcription start
PvCDPK1.2	191	195	TATA-box	core promoter element around -30 of transcription start
PvCDPK1.2	249	255	TATA-box	core promoter element around -30 of transcription start
PvCDPK1.2	250	255	TATA-box	core promoter element around -30 of transcription start
PvCDPK1.2	251	255	TATA-box	core promoter element around -30 of transcription start
PvCDPK1.2	496	502	TATA-box	core promoter element around -30 of transcription start
PvCDPK1.2	497	504	TATA-box	core promoter element around -30 of transcription start
PvCDPK1.2	498	504	TATA-box	core promoter element around -30 of transcription start
PvCDPK1.2	499	505	TATA-box	core promoter element around -30 of transcription start
PvCDPK1.2	500	504	TATA-box	core promoter element around -30 of transcription start
PvCDPK1.2	532	543	TATA-box	core promoter element around -30 of transcription start
PvCDPK1.2	738	745	TATA-box	core promoter element around -30 of transcription start
PvCDPK1.2	739	745	TATA-box	core promoter element around -30 of transcription start
PvCDPK1.2	741	745	TATA-box	core promoter element around -30 of transcription start
PvCDPK1.2	778	785	TATA-box	core promoter element around -30 of transcription start
PvCDPK1.2	779	785	TATA-box	core promoter element around -30 of transcription start
PvCDPK1.2	780	785	TATA-box	core promoter element around -30 of transcription start
PvCDPK1.2	781	785	TATA-box	core promoter element around -30 of transcription start
PvCDPK1.2	786	792	TATA-box	core promoter element around -30 of transcription start
PvCDPK1.2	787	791	TATA-box	core promoter element around -30 of transcription start
PvCDPK1.2	796	803	TATA-box	core promoter element around -30 of transcription start
PvCDPK1.2	797	803	TATA-box	core promoter element around -30 of transcription start
PvCDPK1.2	798	803	TATA-box	core promoter element around -30 of transcription start
PvCDPK1.2	799	803	TATA-box	core promoter element around -30 of transcription start
PvCDPK1.2	867	873	TATA-box	core promoter element around -30 of transcription start
PvCDPK1.2	868	874	TATA-box	core promoter element around -30 of transcription start
PvCDPK1.2	869	873	TATA-box	core promoter element around -30 of transcription start
PvCDPK1.2	876	883	TATA-box	core promoter element around -30 of transcription start
PvCDPK1.2	877	883	TATA-box	core promoter element around -30 of transcription start
PvCDPK1.2	878	883	TATA-box	core promoter element around -30 of transcription start
PvCDPK1.2	879	883	TATA-box	core promoter element around -30 of transcription start
PvCDPK1.2	883	889	TATA-box	core promoter element around -30 of transcription start
PvCDPK1.2	884	888	TATA-box	core promoter element around -30 of transcription start
PvCDPK1.2	995	1001	TATA-box	core promoter element around -30 of transcription start
PvCDPK1.2	996	1000	TATA-box	core promoter element around -30 of transcription start
PvCDPK1.2	1056	1062	TATA-box	core promoter element around -30 of transcription start
PvCDPK1.2	1057	1061	TATA-box	core promoter element around -30 of transcription start
PvCDPK1.2	1104	1111	TATA-box	core promoter element around -30 of transcription start
PvCDPK1.2	1146	1152	TATA-box	core promoter element around -30 of transcription start
PvCDPK1.2	1148	1154	TATA-box	core promoter element around -30 of transcription start
PvCDPK1.2	1149	1155	TATA-box	core promoter element around -30 of transcription start
PvCDPK1.2	1150	1154	TATA-box	core promoter element around -30 of transcription start
PvCDPK1.2	1165	1171	TATA-box	core promoter element around -30 of transcription start
PvCDPK1.2	1166	1173	TATA-box	core promoter element around -30 of transcription start
PvCDPK1.2	1167	1173	TATA-box	core promoter element around -30 of transcription start
PvCDPK1.2	1168	1174	TATA-box	core promoter element around -30 of transcription start
PvCDPK1.2	1169	1173	TATA-box	core promoter element around -30 of transcription start
PvCDPK1.2	1180	1192	TATA-box	core promoter element around -30 of transcription start
PvCDPK1.2	1182	1190	TATA-box	core promoter element around -30 of transcription start
PvCDPK1.2	1183	1190	TATA-box	core promoter element around -30 of transcription start
PvCDPK1.2	1184	1190	TATA-box	core promoter element around -30 of transcription start
PvCDPK1.2	1185	1190	TATA-box	core promoter element around -30 of transcription start
PvCDPK1.2	1186	1190	TATA-box	core promoter element around -30 of transcription start
PvCDPK1.2	1319	1325	TATA-box	core promoter element around -30 of transcription start
PvCDPK1.2	1321	1325	TATA-box	core promoter element around -30 of transcription start
PvCDPK1.2	1494	1503	TATA-box	core promoter element around -30 of transcription start
PvCDPK1.2	1495	1502	TATA-box	core promoter element around -30 of transcription start
PvCDPK1.2	1496	1502	TATA-box	core promoter element around -30 of transcription start
PvCDPK1.2	1497	1502	TATA-box	core promoter element around -30 of transcription start
PvCDPK1.2	1498	1502	TATA-box	core promoter element around -30 of transcription start
PvCDPK1.2	1564	1570	TATA-box	core promoter element around -30 of transcription start
PvCDPK1.2	1566	1570	TATA-box	core promoter element around -30 of transcription start
PvCDPK1.2	1646	1653	TATA-box	core promoter element around -30 of transcription start
PvCDPK1.2	1357	1363	Myb
PvCDPK1.2	1608	1614	Myb
PvCDPK1.2	7	11	CAAT-box
PvCDPK1.2	24	28	CAAT-box
PvCDPK1.2	113	117	CAAT-box
PvCDPK1.2	121	125	CAAT-box
PvCDPK1.2	132	136	CAAT-box
PvCDPK1.2	212	216	CAAT-box
PvCDPK1.2	306	311	CAAT-box	common cis-acting element in promoter and enhancer regions
PvCDPK1.2	481	485	CAAT-box
PvCDPK1.2	539	543	CAAT-box
PvCDPK1.2	543	547	CAAT-box
PvCDPK1.2	562	567	CAAT-box	common cis-acting element in promoter and enhancer regions
PvCDPK1.2	569	574	CAAT-box	common cis-acting element in promoter and enhancer regions
PvCDPK1.2	652	656	CAAT-box
PvCDPK1.2	701	706	CAAT-box	common cis-acting element in promoter and enhancer regions
PvCDPK1.2	721	725	CAAT-box
PvCDPK1.2	726	731	CAAT-box	common cis-acting element in promoter and enhancer regions
PvCDPK1.2	764	768	CAAT-box
PvCDPK1.2	819	824	CAAT-box	common cis-acting element in promoter and enhancer regions
PvCDPK1.2	948	953	CAAT-box	common cis-acting element in promoter and enhancer regions
PvCDPK1.2	1053	1058	CAAT-box	common cis-acting element in promoter and enhancer regions
PvCDPK1.2	1066	1070	CAAT-box
PvCDPK1.2	1116	1120	CAAT-box
PvCDPK1.2	1139	1144	CAAT-box	common cis-acting element in promoter and enhancer regions
PvCDPK1.2	1509	1514	CAAT-box	common cis-acting element in promoter and enhancer regions
PvCDPK1.2	1626	1630	CAAT-box
PvCDPK1.2	1689	1693	CAAT-box
PvCDPK1.2	1700	1704	CAAT-box
PvCDPK1.2	1811	1816	CAAT-box	common cis-acting element in promoter and enhancer regions
PvCDPK1.2	1822	1826	CAAT-box
PvCDPK1.2	1881	1885	CAAT-box
PvCDPK1.2	1977	1981	CAAT-box
PvCDPK1.2	1997	2001	CAAT-box
PvCDPK1.2	1544	1551	P-box	gibberellin-responsive element
PvCDPK1.2	316	326.5	MBSI	MYB binding site involved in flavonoid biosynthetic genes regulation
PvCDPK1.2	388	397	TCA-element	cis-acting element involved in salicylic acid responsiveness
PvCDPK1.2	1029	1038	TCA-element	cis-acting element involved in salicylic acid responsiveness
PvCDPK1.2	50	54		short_function
PvCDPK1.2	389	393		short_function
PvCDPK1.2	394	398		short_function
PvCDPK1.2	402	406		short_function
PvCDPK1.2	924	928		short_function
PvCDPK1.2	968	972		short_function
PvCDPK1.2	975	979		short_function
PvCDPK1.2	1304	1308		short_function
PvCDPK1.2	1324	1328		short_function
PvCDPK1.2	1447	1451		short_function
PvCDPK1.2	1480	1484		short_function
PvCDPK1.2	1611	1615		short_function
PvCDPK1.2	714	719	STRE
PvCDPK1.2	1667	1672	STRE
PvCDPK1.2	1462	1468	W box
PvCDPK1.2	1937	1945	dOCT
PvCDPK1.2	1391	1397	TCT-motif	part of a light responsive element
PvCDPK1.2	72	80	AT~TATA-box
PvCDPK1.2	74	80	AT~TATA-box
PvCDPK1.2	76	82	AT~TATA-box
PvCDPK1.2	498	504	AT~TATA-box
PvCDPK1.2	739	745	AT~TATA-box
PvCDPK1.2	867	873	AT~TATA-box
PvCDPK1.2	1148	1154	AT~TATA-box
PvCDPK1.2	1167	1173	AT~TATA-box
PvCDPK1.2	1920	1929	O2-site	cis-acting regulatory element involved in zein metabolism regulation
PvCDPK1.2	271	277	ARE	cis-acting regulatory element essential for the anaerobic induction
PvCDPK1.2	319	325	ARE	cis-acting regulatory element essential for the anaerobic induction
PvCDPK1.2	1298	1304	ARE	cis-acting regulatory element essential for the anaerobic induction
PvCDPK1.2	423	430	TATC-box	cis-acting element involved in gibberellin-responsiveness
PvCDPK1.2	1175	1183	WUN-motif
PvCDPK1.2	1478	1487	TCA
PvCDPK1.2	1793	1802	TCA
PvCDPK1.2	70	78	TATA
PvCDPK1.2	777	785	TATA
PvCDPK1.2	875	883	TATA
PvCDPK1.2	583	590	GCN4_motif	cis-regulatory element involved in endosperm expression
PvCDPK1.2	1357	1363	MBS	MYB binding site involved in drought-inducibility
PvCDPK1.2	1608	1614	MBS	MYB binding site involved in drought-inducibility
PvCDPK1.2	639	647	chs-CMA1a	part of a light responsive element
PvCDPK1.2	1534	1541	AAGAA-motif
PvCDPK1.2	1538	1545	AAGAA-motif
PvCDPK1.2	1454	1461	box S
PvCDPK10.1	623	628	CGTCA-motif	cis-acting regulatory element involved in the MeJA-responsiveness
PvCDPK10.1	1147	1152	CGTCA-motif	cis-acting regulatory element involved in the MeJA-responsiveness
PvCDPK10.1	1987	1992	CGTCA-motif	cis-acting regulatory element involved in the MeJA-responsiveness
PvCDPK10.1	1495	1502	P-box	gibberellin-responsive element
PvCDPK10.1	1349	1355	G-Box	cis-acting regulatory element involved in light responsiveness
PvCDPK10.1	33	37	CAAT-box
PvCDPK10.1	40	44	CAAT-box
PvCDPK10.1	45	50	CAAT-box	common cis-acting element in promoter and enhancer regions
PvCDPK10.1	141	145	CAAT-box
PvCDPK10.1	189	194	CAAT-box	common cis-acting element in promoter and enhancer regions
PvCDPK10.1	290	295	CAAT-box	common cis-acting element in promoter and enhancer regions
PvCDPK10.1	300	304	CAAT-box
PvCDPK10.1	392	397	CAAT-box	common cis-acting element in promoter and enhancer regions
PvCDPK10.1	423	427	CAAT-box
PvCDPK10.1	495	499	CAAT-box
PvCDPK10.1	512	517	CAAT-box	common cis-acting element in promoter and enhancer regions
PvCDPK10.1	551	555	CAAT-box
PvCDPK10.1	588	592	CAAT-box
PvCDPK10.1	770	774	CAAT-box
PvCDPK10.1	782	787	CAAT-box	common cis-acting element in promoter and enhancer regions
PvCDPK10.1	783	787	CAAT-box
PvCDPK10.1	808	812	CAAT-box
PvCDPK10.1	886	891	CAAT-box	common cis-acting element in promoter and enhancer regions
PvCDPK10.1	1015	1019	CAAT-box
PvCDPK10.1	1039	1043	CAAT-box
PvCDPK10.1	1050	1055	CAAT-box	common cis-acting element in promoter and enhancer regions
PvCDPK10.1	1055	1059	CAAT-box
PvCDPK10.1	1066	1071	CAAT-box	common cis-acting element in promoter and enhancer regions
PvCDPK10.1	1084	1088	CAAT-box
PvCDPK10.1	1086	1090	CAAT-box
PvCDPK10.1	1101	1105	CAAT-box
PvCDPK10.1	1114	1118	CAAT-box
PvCDPK10.1	1123	1127	CAAT-box
PvCDPK10.1	1204	1208	CAAT-box
PvCDPK10.1	1218	1222	CAAT-box
PvCDPK10.1	1271	1275	CAAT-box
PvCDPK10.1	1294	1299	CAAT-box	common cis-acting element in promoter and enhancer regions
PvCDPK10.1	1295	1299	CAAT-box
PvCDPK10.1	1315	1319	CAAT-box
PvCDPK10.1	1337	1341	CAAT-box
PvCDPK10.1	1384	1389	CAAT-box	common cis-acting element in promoter and enhancer regions
PvCDPK10.1	1389	1394	CAAT-box	common cis-acting element in promoter and enhancer regions
PvCDPK10.1	1432	1436	CAAT-box
PvCDPK10.1	1444	1449	CAAT-box	common cis-acting element in promoter and enhancer regions
PvCDPK10.1	1576	1580	CAAT-box
PvCDPK10.1	1587	1591	CAAT-box
PvCDPK10.1	1597	1601	CAAT-box
PvCDPK10.1	1622	1627	CAAT-box	common cis-acting element in promoter and enhancer regions
PvCDPK10.1	1623	1627	CAAT-box
PvCDPK10.1	1636	1640	CAAT-box
PvCDPK10.1	1655	1660	CAAT-box	common cis-acting element in promoter and enhancer regions
PvCDPK10.1	1658	1662	CAAT-box
PvCDPK10.1	1668	1673	CAAT-box	common cis-acting element in promoter and enhancer regions
PvCDPK10.1	1682	1686	CAAT-box
PvCDPK10.1	1694	1699	CAAT-box	common cis-acting element in promoter and enhancer regions
PvCDPK10.1	1704	1708	CAAT-box
PvCDPK10.1	1793	1797	CAAT-box
PvCDPK10.1	1810	1815	CAAT-box	common cis-acting element in promoter and enhancer regions
PvCDPK10.1	1874	1879	CAAT-box	common cis-acting element in promoter and enhancer regions
PvCDPK10.1	1875	1879	CAAT-box
PvCDPK10.1	1126	1132	MYB
PvCDPK10.1	275	282	MRE	MYB binding site involved in light responsiveness
PvCDPK10.1	256	264	TATA-box	core promoter element around -30 of transcription start
PvCDPK10.1	258	266	TATA-box	core promoter element around -30 of transcription start
PvCDPK10.1	320	327	TATA-box	core promoter element around -30 of transcription start
PvCDPK10.1	321	327	TATA-box	core promoter element around -30 of transcription start
PvCDPK10.1	322	327	TATA-box	core promoter element around -30 of transcription start
PvCDPK10.1	323	327	TATA-box	core promoter element around -30 of transcription start
PvCDPK10.1	430	434	TATA-box	core promoter element around -30 of transcription start
PvCDPK10.1	441	445	TATA-box	core promoter element around -30 of transcription start
PvCDPK10.1	796	802	TATA-box	core promoter element around -30 of transcription start
PvCDPK10.1	797	802	TATA-box	core promoter element around -30 of transcription start
PvCDPK10.1	798	802	TATA-box	core promoter element around -30 of transcription start
PvCDPK10.1	857	861	TATA-box	core promoter element around -30 of transcription start
PvCDPK10.1	955	962	TATA-box	core promoter element around -30 of transcription start
PvCDPK10.1	1108	1115	TATA-box	core promoter element around -30 of transcription start
PvCDPK10.1	1142	1146	TATA-box	core promoter element around -30 of transcription start
PvCDPK10.1	1225	1231	TATA-box	core promoter element around -30 of transcription start
PvCDPK10.1	1226	1231	TATA-box	core promoter element around -30 of transcription start
PvCDPK10.1	1227	1231	TATA-box	core promoter element around -30 of transcription start
PvCDPK10.1	1329	1335	TATA-box	core promoter element around -30 of transcription start
PvCDPK10.1	1330	1336	TATA-box	core promoter element around -30 of transcription start
PvCDPK10.1	1331	1335	TATA-box	core promoter element around -30 of transcription start
PvCDPK10.1	1530	1536	TATA-box	core promoter element around -30 of transcription start
PvCDPK10.1	1531	1536	TATA-box	core promoter element around -30 of transcription start
PvCDPK10.1	1532	1536	TATA-box	core promoter element around -30 of transcription start
PvCDPK10.1	462	466	Unnamed__4
PvCDPK10.1	922	926	Unnamed__4
PvCDPK10.1	1155	1159	Unnamed__4
PvCDPK10.1	1697	1701	Unnamed__4
PvCDPK10.1	1800	1804	Unnamed__4
PvCDPK10.1	1921	1925	Unnamed__4
PvCDPK10.1	994	1005	Unnamed__1	60K protein binding site
PvCDPK10.1	1348	1353	Unnamed__1
PvCDPK10.1	1582	1587	Unnamed__1
PvCDPK10.1	1103	1109	Box 4	part of a conserved DNA module involved in light responsiveness
PvCDPK10.1	1436	1442	Box 4	part of a conserved DNA module involved in light responsiveness
PvCDPK10.1	417	425	ERE
PvCDPK10.1	1847	1854	Myc
PvCDPK10.1	1300	1306	MYB recognition site
PvCDPK10.1	1349	1354	ABRE	cis-acting element involved in the abscisic acid responsiveness
PvCDPK10.1	356	366	F-box
PvCDPK10.1	630	638	chs-CMA1a	part of a light responsive element
PvCDPK10.1	655	663	chs-CMA1a	part of a light responsive element
PvCDPK10.1	145	154	AAGAA-motif
PvCDPK10.1	1158	1165	AAGAA-motif
PvCDPK10.1	1190	1196	CAT-box	cis-acting regulatory element related to meristem expression
PvCDPK10.1	1954	1963	TCA
PvCDPK10.1	729	739	I-box	part of a light responsive element
PvCDPK10.1	623	628	TGACG-motif	cis-acting regulatory element involved in the MeJA-responsiveness
PvCDPK10.1	1147	1152	TGACG-motif	cis-acting regulatory element involved in the MeJA-responsiveness
PvCDPK10.1	1987	1992	TGACG-motif	cis-acting regulatory element involved in the MeJA-responsiveness
PvCDPK10.1	1298	1307	MSA-like	cis-acting element involved in cell cycle regulation
PvCDPK10.1	728	737	GATA-motif	part of a light responsive element
PvCDPK10.1	825	835	GATA-motif	part of a light responsive element
PvCDPK10.1	623	628	as-1
PvCDPK10.1	1147	1152	as-1
PvCDPK10.1	1987	1992	as-1
PvCDPK10.1	1949	1958	O2-site	cis-acting regulatory element involved in zein metabolism regulation
PvCDPK10.1	113	119	ARE	cis-acting regulatory element essential for the anaerobic induction
PvCDPK10.1	669	675	ARE	cis-acting regulatory element essential for the anaerobic induction
PvCDPK10.1	1871	1877	ARE	cis-acting regulatory element essential for the anaerobic induction
PvCDPK10.1	1300	1306	CCAAT-box	MYBHv1 binding site
PvCDPK10.1	1329	1335	AT~TATA-box
PvCDPK10.1	1016	1022	W box
PvCDPK10.1	369	374	STRE
PvCDPK10.1	865	870	STRE
PvCDPK10.1	44	50	MYC
PvCDPK10.1	188	194	MYC
PvCDPK10.1	512	518	MYC
PvCDPK10.1	1084	1090	MYC
PvCDPK10.1	1261	1267	MYC
PvCDPK10.1	17	21		short_function
PvCDPK10.1	148	152		short_function
PvCDPK10.1	179	183		short_function
PvCDPK10.1	310	314		short_function
PvCDPK10.1	411	415		short_function
PvCDPK10.1	498	502		short_function
PvCDPK10.1	900	904		short_function
PvCDPK10.1	980	984		short_function
PvCDPK10.1	1477	1481		short_function
PvCDPK10.1	1697	1701		short_function
PvCDPK10.1	1804	1808		short_function
PvCDPK10.1	1968	1974	WRE3
PvCDPK10.1	1935	1943	CARE
PvCDPK10.1	665	671	GT1-motif	light responsive element
PvCDPK10.1	736	742	GT1-motif	light responsive element
PvCDPK10.1	1304	1311	GT1-motif	light responsive element
PvCDPK10.2	948	954	MYC
PvCDPK10.2	996	1002	MYC
PvCDPK10.2	1706	1712	MYC
PvCDPK10.2	622	626		short_function
PvCDPK10.2	951	955		short_function
PvCDPK10.2	1057	1061		short_function
PvCDPK10.2	1185	1189		short_function
PvCDPK10.2	1261	1265		short_function
PvCDPK10.2	1628	1632		short_function
PvCDPK10.2	1658	1662		short_function
PvCDPK10.2	1761	1765		short_function
PvCDPK10.2	1969	1973		short_function
PvCDPK10.2	328	333	STRE
PvCDPK10.2	1536	1541	STRE
PvCDPK10.2	1507	1513	GT1-motif	light responsive element
PvCDPK10.2	1737	1744	TATC-box	cis-acting element involved in gibberellin-responsiveness
PvCDPK10.2	596	602	TCT-motif	part of a light responsive element
PvCDPK10.2	727	733	AT~TATA-box
PvCDPK10.2	1324	1330	AT~TATA-box
PvCDPK10.2	1590	1596	G-box	cis-acting regulatory element involved in light responsiveness
PvCDPK10.2	667	673	MYB-like sequence
PvCDPK10.2	1188	1194	MBS	MYB binding site involved in drought-inducibility
PvCDPK10.2	322	329	AAGAA-motif
PvCDPK10.2	1001	1008	AAGAA-motif
PvCDPK10.2	1856	1865	AAGAA-motif
PvCDPK10.2	1831	1839	chs-CMA1a	part of a light responsive element
PvCDPK10.2	614	623	I-box	part of a light responsive element
PvCDPK10.2	620	629	TCA
PvCDPK10.2	487	495	TATA
PvCDPK10.2	145	151	Box 4	part of a conserved DNA module involved in light responsiveness
PvCDPK10.2	497	503	Box 4	part of a conserved DNA module involved in light responsiveness
PvCDPK10.2	275	283	ERE
PvCDPK10.2	297	305	ERE
PvCDPK10.2	914	922	ERE
PvCDPK10.2	986	994	ERE
PvCDPK10.2	988	996	ERE
PvCDPK10.2	1013	1021	ERE
PvCDPK10.2	923	930	Myc
PvCDPK10.2	1351	1358	Myc
PvCDPK10.2	35	40	Unnamed__1
PvCDPK10.2	1590	1596	ABRE	cis-acting element involved in the abscisic acid responsiveness
PvCDPK10.2	1591	1596	ABRE	cis-acting element involved in the abscisic acid responsiveness
PvCDPK10.2	1188	1194	Myb
PvCDPK10.2	1139	1147	AE-box	part of a module for light response
PvCDPK10.2	113	120	TATA-box	core promoter element around -30 of transcription start
PvCDPK10.2	188	192	TATA-box	core promoter element around -30 of transcription start
PvCDPK10.2	242	249	TATA-box	core promoter element around -30 of transcription start
PvCDPK10.2	243	249	TATA-box	core promoter element around -30 of transcription start
PvCDPK10.2	244	249	TATA-box	core promoter element around -30 of transcription start
PvCDPK10.2	245	249	TATA-box	core promoter element around -30 of transcription start
PvCDPK10.2	299	307	TATA-box	core promoter element around -30 of transcription start
PvCDPK10.2	310	316	TATA-box	core promoter element around -30 of transcription start
PvCDPK10.2	312	316	TATA-box	core promoter element around -30 of transcription start
PvCDPK10.2	315	321	TATA-box	core promoter element around -30 of transcription start
PvCDPK10.2	316	321	TATA-box	core promoter element around -30 of transcription start
PvCDPK10.2	317	321	TATA-box	core promoter element around -30 of transcription start
PvCDPK10.2	486	492	TATA-box	core promoter element around -30 of transcription start
PvCDPK10.2	487	491	TATA-box	core promoter element around -30 of transcription start
PvCDPK10.2	533	545	TATA-box	core promoter element around -30 of transcription start
PvCDPK10.2	535	543	TATA-box	core promoter element around -30 of transcription start
PvCDPK10.2	536	543	TATA-box	core promoter element around -30 of transcription start
PvCDPK10.2	537	543	TATA-box	core promoter element around -30 of transcription start
PvCDPK10.2	538	543	TATA-box	core promoter element around -30 of transcription start
PvCDPK10.2	539	543	TATA-box	core promoter element around -30 of transcription start
PvCDPK10.2	571	578	TATA-box	core promoter element around -30 of transcription start
PvCDPK10.2	572	578	TATA-box	core promoter element around -30 of transcription start
PvCDPK10.2	573	578	TATA-box	core promoter element around -30 of transcription start
PvCDPK10.2	574	578	TATA-box	core promoter element around -30 of transcription start
PvCDPK10.2	602	608	TATA-box	core promoter element around -30 of transcription start
PvCDPK10.2	603	608	TATA-box	core promoter element around -30 of transcription start
PvCDPK10.2	604	608	TATA-box	core promoter element around -30 of transcription start
PvCDPK10.2	661	667	TATA-box	core promoter element around -30 of transcription start
PvCDPK10.2	662	666	TATA-box	core promoter element around -30 of transcription start
PvCDPK10.2	694	701	TATA-box	core promoter element around -30 of transcription start
PvCDPK10.2	695	701	TATA-box	core promoter element around -30 of transcription start
PvCDPK10.2	696	701	TATA-box	core promoter element around -30 of transcription start
PvCDPK10.2	697	701	TATA-box	core promoter element around -30 of transcription start
PvCDPK10.2	726	733	TATA-box	core promoter element around -30 of transcription start
PvCDPK10.2	727	733	TATA-box	core promoter element around -30 of transcription start
PvCDPK10.2	728	734	TATA-box	core promoter element around -30 of transcription start
PvCDPK10.2	729	733	TATA-box	core promoter element around -30 of transcription start
PvCDPK10.2	783	789	TATA-box	core promoter element around -30 of transcription start
PvCDPK10.2	784	789	TATA-box	core promoter element around -30 of transcription start
PvCDPK10.2	785	789	TATA-box	core promoter element around -30 of transcription start
PvCDPK10.2	969	975	TATA-box	core promoter element around -30 of transcription start
PvCDPK10.2	970	974	TATA-box	core promoter element around -30 of transcription start
PvCDPK10.2	1011	1019	TATA-box	core promoter element around -30 of transcription start
PvCDPK10.2	1068	1074	TATA-box	core promoter element around -30 of transcription start
PvCDPK10.2	1069	1073	TATA-box	core promoter element around -30 of transcription start
PvCDPK10.2	1088	1094	TATA-box	core promoter element around -30 of transcription start
PvCDPK10.2	1089	1094	TATA-box	core promoter element around -30 of transcription start
PvCDPK10.2	1090	1094	TATA-box	core promoter element around -30 of transcription start
PvCDPK10.2	1197	1201	TATA-box	core promoter element around -30 of transcription start
PvCDPK10.2	1203	1209	TATA-box	core promoter element around -30 of transcription start
PvCDPK10.2	1205	1209	TATA-box	core promoter element around -30 of transcription start
PvCDPK10.2	1311	1317	TATA-box	core promoter element around -30 of transcription start
PvCDPK10.2	1312	1316	TATA-box	core promoter element around -30 of transcription start
PvCDPK10.2	1323	1329	TATA-box	core promoter element around -30 of transcription start
PvCDPK10.2	1324	1330	TATA-box	core promoter element around -30 of transcription start
PvCDPK10.2	1325	1331	TATA-box	core promoter element around -30 of transcription start
PvCDPK10.2	1326	1330	TATA-box	core promoter element around -30 of transcription start
PvCDPK10.2	1427	1433	TATA-box	core promoter element around -30 of transcription start
PvCDPK10.2	1428	1433	TATA-box	core promoter element around -30 of transcription start
PvCDPK10.2	1429	1433	TATA-box	core promoter element around -30 of transcription start
PvCDPK10.2	1459	1464	TATA-box	core promoter element around -30 of transcription start
PvCDPK10.2	1460	1464	TATA-box	core promoter element around -30 of transcription start
PvCDPK10.2	1496	1502	TATA-box	core promoter element around -30 of transcription start
PvCDPK10.2	1497	1501	TATA-box	core promoter element around -30 of transcription start
PvCDPK10.2	1562	1568	TATA-box	core promoter element around -30 of transcription start
PvCDPK10.2	1564	1568	TATA-box	core promoter element around -30 of transcription start
PvCDPK10.2	1610	1616	TATA-box	core promoter element around -30 of transcription start
PvCDPK10.2	1611	1616	TATA-box	core promoter element around -30 of transcription start
PvCDPK10.2	1612	1616	TATA-box	core promoter element around -30 of transcription start
PvCDPK10.2	1654	1661	TATA-box	core promoter element around -30 of transcription start
PvCDPK10.2	1794	1800	TATA-box	core promoter element around -30 of transcription start
PvCDPK10.2	1795	1799	TATA-box	core promoter element around -30 of transcription start
PvCDPK10.2	10	14	CAAT-box
PvCDPK10.2	156	160	CAAT-box
PvCDPK10.2	179	183	CAAT-box
PvCDPK10.2	240	244	CAAT-box
PvCDPK10.2	405	409	CAAT-box
PvCDPK10.2	511	515	CAAT-box
PvCDPK10.2	552	556	CAAT-box
PvCDPK10.2	746	750	CAAT-box
PvCDPK10.2	751	755	CAAT-box
PvCDPK10.2	761	765	CAAT-box
PvCDPK10.2	769	773	CAAT-box
PvCDPK10.2	819	824	CAAT-box	common cis-acting element in promoter and enhancer regions
PvCDPK10.2	996	1001	CAAT-box	common cis-acting element in promoter and enhancer regions
PvCDPK10.2	1008	1012	CAAT-box
PvCDPK10.2	1101	1106	CAAT-box	common cis-acting element in promoter and enhancer regions
PvCDPK10.2	1128	1133	CAAT-box	common cis-acting element in promoter and enhancer regions
PvCDPK10.2	1363	1368	CAAT-box	common cis-acting element in promoter and enhancer regions
PvCDPK10.2	1445	1450	CAAT-box	common cis-acting element in promoter and enhancer regions
PvCDPK10.2	1650	1654	CAAT-box
PvCDPK10.2	1681	1685	CAAT-box
PvCDPK10.2	1691	1695	CAAT-box
PvCDPK10.2	1758	1762	CAAT-box
PvCDPK10.2	1771	1775	CAAT-box
PvCDPK10.2	1821	1825	CAAT-box
PvCDPK10.2	1590	1596	G-Box	cis-acting regulatory element involved in light responsiveness
PvCDPK10.2	2	8	TGA-element	auxin-responsive element
PvCDPK10.2	667	673	MYB
PvCDPK10.2	983	992	AT-rich sequence	element for maximal elicitor-mediated activation (2copies)
PvCDPK10.2	1351	1361	3-AF1 binding site	light responsive element
PvCDPK11.1	1142	1148	ARE	cis-acting regulatory element essential for the anaerobic induction
PvCDPK11.1	1393	1399	ARE	cis-acting regulatory element essential for the anaerobic induction
PvCDPK11.1	1637	1643	ARE	cis-acting regulatory element essential for the anaerobic induction
PvCDPK11.1	323	331	O2-site	cis-acting regulatory element involved in zein metabolism regulation
PvCDPK11.1	124	131	GATA-motif	part of a light responsive element
PvCDPK11.1	874	882	AT~TATA-box
PvCDPK11.1	876	882	AT~TATA-box
PvCDPK11.1	957	965	AT~TATA-box
PvCDPK11.1	959	965	AT~TATA-box
PvCDPK11.1	1534	1540	AT~TATA-box
PvCDPK11.1	59	68	G-box	cis-acting regulatory element involved in light responsiveness
PvCDPK11.1	93	99	CCAAT-box	MYBHv1 binding site
PvCDPK11.1	104	110	MYC
PvCDPK11.1	545	551	MYC
PvCDPK11.1	1443	1449	MYC
PvCDPK11.1	453	457		short_function
PvCDPK11.1	466	470		short_function
PvCDPK11.1	621	625		short_function
PvCDPK11.1	701	705		short_function
PvCDPK11.1	991	995		short_function
PvCDPK11.1	1036	1040		short_function
PvCDPK11.1	1233	1237		short_function
PvCDPK11.1	1272	1276		short_function
PvCDPK11.1	1288	1292		short_function
PvCDPK11.1	1488	1492		short_function
PvCDPK11.1	1541	1545		short_function
PvCDPK11.1	1661	1665		short_function
PvCDPK11.1	1924	1928		short_function
PvCDPK11.1	1808	1813	STRE
PvCDPK11.1	1897	1903	WRE3
PvCDPK11.1	1952	1958	Myb-binding site
PvCDPK11.1	800	806	CAT-box	cis-acting regulatory element related to meristem expression
PvCDPK11.1	1528	1534	MBS	MYB binding site involved in drought-inducibility
PvCDPK11.1	756	763	AAGAA-motif
PvCDPK11.1	1558	1565	AAGAA-motif
PvCDPK11.1	1817	1824	AAGAA-motif
PvCDPK11.1	935	944	TCA
PvCDPK11.1	693	701	TATA
PvCDPK11.1	878	886	TATA
PvCDPK11.1	885	893	TATA
PvCDPK11.1	961	969	TATA
PvCDPK11.1	549	555	MYB-like sequence
PvCDPK11.1	316	322	Myb
PvCDPK11.1	1528	1534	Myb
PvCDPK11.1	1553	1559	Myb
PvCDPK11.1	1949	1955	Myb
PvCDPK11.1	153	160	TATA-box	core promoter element around -30 of transcription start
PvCDPK11.1	154	160	TATA-box	core promoter element around -30 of transcription start
PvCDPK11.1	155	160	TATA-box	core promoter element around -30 of transcription start
PvCDPK11.1	156	160	TATA-box	core promoter element around -30 of transcription start
PvCDPK11.1	184	188	TATA-box	core promoter element around -30 of transcription start
PvCDPK11.1	199	205	TATA-box	core promoter element around -30 of transcription start
PvCDPK11.1	200	204	TATA-box	core promoter element around -30 of transcription start
PvCDPK11.1	336	342	TATA-box	core promoter element around -30 of transcription start
PvCDPK11.1	337	341	TATA-box	core promoter element around -30 of transcription start
PvCDPK11.1	684	689	TATA-box	core promoter element around -30 of transcription start
PvCDPK11.1	685	689	TATA-box	core promoter element around -30 of transcription start
PvCDPK11.1	692	698	TATA-box	core promoter element around -30 of transcription start
PvCDPK11.1	693	697	TATA-box	core promoter element around -30 of transcription start
PvCDPK11.1	721	729	TATA-box	core promoter element around -30 of transcription start
PvCDPK11.1	793	800	TATA-box	core promoter element around -30 of transcription start
PvCDPK11.1	819	825	TATA-box	core promoter element around -30 of transcription start
PvCDPK11.1	820	825	TATA-box	core promoter element around -30 of transcription start
PvCDPK11.1	821	825	TATA-box	core promoter element around -30 of transcription start
PvCDPK11.1	827	833	TATA-box	core promoter element around -30 of transcription start
PvCDPK11.1	828	833	TATA-box	core promoter element around -30 of transcription start
PvCDPK11.1	829	833	TATA-box	core promoter element around -30 of transcription start
PvCDPK11.1	831	838	TATA-box	core promoter element around -30 of transcription start
PvCDPK11.1	837	843	TATA-box	core promoter element around -30 of transcription start
PvCDPK11.1	838	842	TATA-box	core promoter element around -30 of transcription start
PvCDPK11.1	866	872	TATA-box	core promoter element around -30 of transcription start
PvCDPK11.1	867	872	TATA-box	core promoter element around -30 of transcription start
PvCDPK11.1	868	872	TATA-box	core promoter element around -30 of transcription start
PvCDPK11.1	873	882	TATA-box	core promoter element around -30 of transcription start
PvCDPK11.1	874	880	TATA-box	core promoter element around -30 of transcription start
PvCDPK11.1	875	882	TATA-box	core promoter element around -30 of transcription start
PvCDPK11.1	876	882	TATA-box	core promoter element around -30 of transcription start
PvCDPK11.1	877	883	TATA-box	core promoter element around -30 of transcription start
PvCDPK11.1	878	882	TATA-box	core promoter element around -30 of transcription start
PvCDPK11.1	884	890	TATA-box	core promoter element around -30 of transcription start
PvCDPK11.1	885	889	TATA-box	core promoter element around -30 of transcription start
PvCDPK11.1	946	953	TATA-box	core promoter element around -30 of transcription start
PvCDPK11.1	947	953	TATA-box	core promoter element around -30 of transcription start
PvCDPK11.1	948	953	TATA-box	core promoter element around -30 of transcription start
PvCDPK11.1	949	953	TATA-box	core promoter element around -30 of transcription start
PvCDPK11.1	953	964	TATA-box	core promoter element around -30 of transcription start
PvCDPK11.1	955	964	TATA-box	core promoter element around -30 of transcription start
PvCDPK11.1	956	963	TATA-box	core promoter element around -30 of transcription start
PvCDPK11.1	957	963	TATA-box	core promoter element around -30 of transcription start
PvCDPK11.1	958	965	TATA-box	core promoter element around -30 of transcription start
PvCDPK11.1	959	965	TATA-box	core promoter element around -30 of transcription start
PvCDPK11.1	960	966	TATA-box	core promoter element around -30 of transcription start
PvCDPK11.1	961	965	TATA-box	core promoter element around -30 of transcription start
PvCDPK11.1	1169	1174	TATA-box	core promoter element around -30 of transcription start
PvCDPK11.1	1170	1174	TATA-box	core promoter element around -30 of transcription start
PvCDPK11.1	1196	1200	TATA-box	core promoter element around -30 of transcription start
PvCDPK11.1	1532	1538	TATA-box	core promoter element around -30 of transcription start
PvCDPK11.1	1534	1540	TATA-box	core promoter element around -30 of transcription start
PvCDPK11.1	1535	1541	TATA-box	core promoter element around -30 of transcription start
PvCDPK11.1	1536	1540	TATA-box	core promoter element around -30 of transcription start
PvCDPK11.1	1576	1582	TATA-box	core promoter element around -30 of transcription start
PvCDPK11.1	1577	1581	TATA-box	core promoter element around -30 of transcription start
PvCDPK11.1	1606	1613	TATA-box	core promoter element around -30 of transcription start
PvCDPK11.1	1607	1613	TATA-box	core promoter element around -30 of transcription start
PvCDPK11.1	1608	1613	TATA-box	core promoter element around -30 of transcription start
PvCDPK11.1	1609	1613	TATA-box	core promoter element around -30 of transcription start
PvCDPK11.1	1633	1637	TATA-box	core promoter element around -30 of transcription start
PvCDPK11.1	1675	1681	TATA-box	core promoter element around -30 of transcription start
PvCDPK11.1	1676	1680	TATA-box	core promoter element around -30 of transcription start
PvCDPK11.1	1699	1705	TATA-box	core promoter element around -30 of transcription start
PvCDPK11.1	1700	1704	TATA-box	core promoter element around -30 of transcription start
PvCDPK11.1	230	236	Box 4	part of a conserved DNA module involved in light responsiveness
PvCDPK11.1	430	436	Box 4	part of a conserved DNA module involved in light responsiveness
PvCDPK11.1	444	450	Box 4	part of a conserved DNA module involved in light responsiveness
PvCDPK11.1	1703	1709	Box 4	part of a conserved DNA module involved in light responsiveness
PvCDPK11.1	219	227	ERE
PvCDPK11.1	1616	1624	ERE
PvCDPK11.1	701	705	Unnamed__4
PvCDPK11.1	993	997	Unnamed__4
PvCDPK11.1	1478	1482	Unnamed__4
PvCDPK11.1	1832	1836	Unnamed__4
PvCDPK11.1	584	591	AuxRR-core	cis-acting regulatory element involved in auxin responsiveness
PvCDPK11.1	62	67	ABRE	cis-acting element involved in the abscisic acid responsiveness
PvCDPK11.1	640	645	ABRE	cis-acting element involved in the abscisic acid responsiveness
PvCDPK11.1	93	99	MYB recognition site
PvCDPK11.1	61	70	Box II	part of a light responsive element
PvCDPK11.1	1880	1888.5	AC-I
PvCDPK11.1	14	18	CAAT-box
PvCDPK11.1	78	83	CAAT-box	common cis-acting element in promoter and enhancer regions
PvCDPK11.1	104	108	CAAT-box
PvCDPK11.1	106	110	CAAT-box
PvCDPK11.1	227	232	CAAT-box	common cis-acting element in promoter and enhancer regions
PvCDPK11.1	279	284	CAAT-box	common cis-acting element in promoter and enhancer regions
PvCDPK11.1	303	308	CAAT-box	common cis-acting element in promoter and enhancer regions
PvCDPK11.1	327	332	CAAT-box	common cis-acting element in promoter and enhancer regions
PvCDPK11.1	398	402	CAAT-box
PvCDPK11.1	515	520	CAAT-box	common cis-acting element in promoter and enhancer regions
PvCDPK11.1	540	544	CAAT-box
PvCDPK11.1	545	550	CAAT-box	common cis-acting element in promoter and enhancer regions
PvCDPK11.1	580	585	CAAT-box	common cis-acting element in promoter and enhancer regions
PvCDPK11.1	658	662	CAAT-box
PvCDPK11.1	662	666	CAAT-box
PvCDPK11.1	689	694	CAAT-box	common cis-acting element in promoter and enhancer regions
PvCDPK11.1	690	694	CAAT-box
PvCDPK11.1	728	732	CAAT-box
PvCDPK11.1	752	757	CAAT-box	common cis-acting element in promoter and enhancer regions
PvCDPK11.1	806	811	CAAT-box	common cis-acting element in promoter and enhancer regions
PvCDPK11.1	853	857	CAAT-box
PvCDPK11.1	971	975	CAAT-box
PvCDPK11.1	1080	1084	CAAT-box
PvCDPK11.1	1109	1113	CAAT-box
PvCDPK11.1	1139	1144	CAAT-box	common cis-acting element in promoter and enhancer regions
PvCDPK11.1	1159	1163	CAAT-box
PvCDPK11.1	1189	1193	CAAT-box
PvCDPK11.1	1238	1243	CAAT-box	common cis-acting element in promoter and enhancer regions
PvCDPK11.1	1357	1362	CAAT-box	common cis-acting element in promoter and enhancer regions
PvCDPK11.1	1362	1367	CAAT-box	common cis-acting element in promoter and enhancer regions
PvCDPK11.1	1444	1449	CAAT-box	common cis-acting element in promoter and enhancer regions
PvCDPK11.1	1472	1477	CAAT-box	common cis-acting element in promoter and enhancer regions
PvCDPK11.1	1580	1585	CAAT-box	common cis-acting element in promoter and enhancer regions
PvCDPK11.1	1590	1594	CAAT-box
PvCDPK11.1	1647	1652	CAAT-box	common cis-acting element in promoter and enhancer regions
PvCDPK11.1	1738	1742	CAAT-box
PvCDPK11.1	1755	1759	CAAT-box
PvCDPK11.1	1837	1842	CAAT-box	common cis-acting element in promoter and enhancer regions
PvCDPK11.1	1842	1847	CAAT-box	common cis-acting element in promoter and enhancer regions
PvCDPK11.1	62	68	G-Box	cis-acting regulatory element involved in light responsiveness
PvCDPK11.1	639	645	G-Box	cis-acting regulatory element involved in light responsiveness
PvCDPK11.1	549	555	MYB
PvCDPK11.1	1952	1958	MYB
PvCDPK11.2	1867	1876	O2-site	cis-acting regulatory element involved in zein metabolism regulation
PvCDPK11.2	1946	1952	ARE	cis-acting regulatory element essential for the anaerobic induction
PvCDPK11.2	1305	1310	as-1
PvCDPK11.2	1739	1744	as-1
PvCDPK11.2	1624	1630	TCT-motif	part of a light responsive element
PvCDPK11.2	1755	1761	TCT-motif	part of a light responsive element
PvCDPK11.2	1861	1867	TCT-motif	part of a light responsive element
PvCDPK11.2	184	190	G-box	cis-acting regulatory element involved in light responsiveness
PvCDPK11.2	1189	1195	AT~TATA-box
PvCDPK11.2	1191	1197	AT~TATA-box
PvCDPK11.2	1728	1736	AT~TATA-box
PvCDPK11.2	1730	1736	AT~TATA-box
PvCDPK11.2	1779	1787	AT~TATA-box
PvCDPK11.2	1781	1787	AT~TATA-box
PvCDPK11.2	73	77		short_function
PvCDPK11.2	96	100		short_function
PvCDPK11.2	1236	1240		short_function
PvCDPK11.2	1238	1242		short_function
PvCDPK11.2	1628	1632		short_function
PvCDPK11.2	1973	1977		short_function
PvCDPK11.2	952	958	MYC
PvCDPK11.2	1802	1808	GT1-motif	light responsive element
PvCDPK11.2	812	818	WRE3
PvCDPK11.2	913	921	chs-CMA1a	part of a light responsive element
PvCDPK11.2	364	370	MYB-like sequence
PvCDPK11.2	1305	1310	TGACG-motif	cis-acting regulatory element involved in the MeJA-responsiveness
PvCDPK11.2	1739	1744	TGACG-motif	cis-acting regulatory element involved in the MeJA-responsiveness
PvCDPK11.2	5	16	TATA-box	core promoter element around -30 of transcription start
PvCDPK11.2	7	15	TATA-box	core promoter element around -30 of transcription start
PvCDPK11.2	8	15	TATA-box	core promoter element around -30 of transcription start
PvCDPK11.2	9	15	TATA-box	core promoter element around -30 of transcription start
PvCDPK11.2	10	15	TATA-box	core promoter element around -30 of transcription start
PvCDPK11.2	11	15	TATA-box	core promoter element around -30 of transcription start
PvCDPK11.2	39	45	TATA-box	core promoter element around -30 of transcription start
PvCDPK11.2	40	44	TATA-box	core promoter element around -30 of transcription start
PvCDPK11.2	82	90	TATA-box	core promoter element around -30 of transcription start
PvCDPK11.2	85	90	TATA-box	core promoter element around -30 of transcription start
PvCDPK11.2	86	90	TATA-box	core promoter element around -30 of transcription start
PvCDPK11.2	160	168	TATA-box	core promoter element around -30 of transcription start
PvCDPK11.2	206	212	TATA-box	core promoter element around -30 of transcription start
PvCDPK11.2	207	211	TATA-box	core promoter element around -30 of transcription start
PvCDPK11.2	229	233	TATA-box	core promoter element around -30 of transcription start
PvCDPK11.2	252	258	TATA-box	core promoter element around -30 of transcription start
PvCDPK11.2	253	257	TATA-box	core promoter element around -30 of transcription start
PvCDPK11.2	343	349	TATA-box	core promoter element around -30 of transcription start
PvCDPK11.2	344	349	TATA-box	core promoter element around -30 of transcription start
PvCDPK11.2	345	349	TATA-box	core promoter element around -30 of transcription start
PvCDPK11.2	421	428	TATA-box	core promoter element around -30 of transcription start
PvCDPK11.2	422	428	TATA-box	core promoter element around -30 of transcription start
PvCDPK11.2	423	428	TATA-box	core promoter element around -30 of transcription start
PvCDPK11.2	424	428	TATA-box	core promoter element around -30 of transcription start
PvCDPK11.2	472	478	TATA-box	core promoter element around -30 of transcription start
PvCDPK11.2	473	478	TATA-box	core promoter element around -30 of transcription start
PvCDPK11.2	474	478	TATA-box	core promoter element around -30 of transcription start
PvCDPK11.2	481	487	TATA-box	core promoter element around -30 of transcription start
PvCDPK11.2	482	486	TATA-box	core promoter element around -30 of transcription start
PvCDPK11.2	560	566	TATA-box	core promoter element around -30 of transcription start
PvCDPK11.2	561	566	TATA-box	core promoter element around -30 of transcription start
PvCDPK11.2	562	566	TATA-box	core promoter element around -30 of transcription start
PvCDPK11.2	652	656	TATA-box	core promoter element around -30 of transcription start
PvCDPK11.2	751	755	TATA-box	core promoter element around -30 of transcription start
PvCDPK11.2	792	796	TATA-box	core promoter element around -30 of transcription start
PvCDPK11.2	867	873	TATA-box	core promoter element around -30 of transcription start
PvCDPK11.2	868	872	TATA-box	core promoter element around -30 of transcription start
PvCDPK11.2	879	887	TATA-box	core promoter element around -30 of transcription start
PvCDPK11.2	1041	1049	TATA-box	core promoter element around -30 of transcription start
PvCDPK11.2	1060	1064	TATA-box	core promoter element around -30 of transcription start
PvCDPK11.2	1104	1111	TATA-box	core promoter element around -30 of transcription start
PvCDPK11.2	1129	1133	TATA-box	core promoter element around -30 of transcription start
PvCDPK11.2	1153	1161	TATA-box	core promoter element around -30 of transcription start
PvCDPK11.2	1188	1194	TATA-box	core promoter element around -30 of transcription start
PvCDPK11.2	1189	1195	TATA-box	core promoter element around -30 of transcription start
PvCDPK11.2	1190	1196	TATA-box	core promoter element around -30 of transcription start
PvCDPK11.2	1191	1197	TATA-box	core promoter element around -30 of transcription start
PvCDPK11.2	1192	1198	TATA-box	core promoter element around -30 of transcription start
PvCDPK11.2	1193	1197	TATA-box	core promoter element around -30 of transcription start
PvCDPK11.2	1402	1409	TATA-box	core promoter element around -30 of transcription start
PvCDPK11.2	1442	1448	TATA-box	core promoter element around -30 of transcription start
PvCDPK11.2	1443	1447	TATA-box	core promoter element around -30 of transcription start
PvCDPK11.2	1570	1577	TATA-box	core promoter element around -30 of transcription start
PvCDPK11.2	1720	1724	TATA-box	core promoter element around -30 of transcription start
PvCDPK11.2	1727	1734	TATA-box	core promoter element around -30 of transcription start
PvCDPK11.2	1728	1734	TATA-box	core promoter element around -30 of transcription start
PvCDPK11.2	1729	1736	TATA-box	core promoter element around -30 of transcription start
PvCDPK11.2	1730	1736	TATA-box	core promoter element around -30 of transcription start
PvCDPK11.2	1731	1737	TATA-box	core promoter element around -30 of transcription start
PvCDPK11.2	1732	1736	TATA-box	core promoter element around -30 of transcription start
PvCDPK11.2	1777	1786	TATA-box	core promoter element around -30 of transcription start
PvCDPK11.2	1778	1785	TATA-box	core promoter element around -30 of transcription start
PvCDPK11.2	1779	1785	TATA-box	core promoter element around -30 of transcription start
PvCDPK11.2	1780	1787	TATA-box	core promoter element around -30 of transcription start
PvCDPK11.2	1781	1787	TATA-box	core promoter element around -30 of transcription start
PvCDPK11.2	1782	1788	TATA-box	core promoter element around -30 of transcription start
PvCDPK11.2	1783	1787	TATA-box	core promoter element around -30 of transcription start
PvCDPK11.2	73	77	Unnamed__4
PvCDPK11.2	766	770	Unnamed__4
PvCDPK11.2	1546	1550	Unnamed__4
PvCDPK11.2	1667	1671	Unnamed__4
PvCDPK11.2	1839	1843	Unnamed__4
PvCDPK11.2	1973	1977	Unnamed__4
PvCDPK11.2	436	444	ERE
PvCDPK11.2	881	889	ERE
PvCDPK11.2	243	249	Box 4	part of a conserved DNA module involved in light responsiveness
PvCDPK11.2	291	297	Box 4	part of a conserved DNA module involved in light responsiveness
PvCDPK11.2	448	454	Box 4	part of a conserved DNA module involved in light responsiveness
PvCDPK11.2	549	555	Box 4	part of a conserved DNA module involved in light responsiveness
PvCDPK11.2	908	914	Box 4	part of a conserved DNA module involved in light responsiveness
PvCDPK11.2	1147	1153	Box 4	part of a conserved DNA module involved in light responsiveness
PvCDPK11.2	1516	1522	Box 4	part of a conserved DNA module involved in light responsiveness
PvCDPK11.2	1565	1571	Box 4	part of a conserved DNA module involved in light responsiveness
PvCDPK11.2	1605	1611	Box 4	part of a conserved DNA module involved in light responsiveness
PvCDPK11.2	1612	1618	Box 4	part of a conserved DNA module involved in light responsiveness
PvCDPK11.2	1693	1699	Box 4	part of a conserved DNA module involved in light responsiveness
PvCDPK11.2	541	546	Unnamed__1
PvCDPK11.2	1069	1078	TC-rich repeats	cis-acting element involved in defense and stress responsiveness
PvCDPK11.2	1751	1760	TC-rich repeats	cis-acting element involved in defense and stress responsiveness
PvCDPK11.2	184	190	ABRE	cis-acting element involved in the abscisic acid responsiveness
PvCDPK11.2	185	190	ABRE	cis-acting element involved in the abscisic acid responsiveness
PvCDPK11.2	1343	1348	ABRE	cis-acting element involved in the abscisic acid responsiveness
PvCDPK11.2	1305	1310	CGTCA-motif	cis-acting regulatory element involved in the MeJA-responsiveness
PvCDPK11.2	1739	1744	CGTCA-motif	cis-acting regulatory element involved in the MeJA-responsiveness
PvCDPK11.2	64	68	CAAT-box
PvCDPK11.2	133	137	CAAT-box
PvCDPK11.2	213	217	CAAT-box
PvCDPK11.2	264	269	CAAT-box	common cis-acting element in promoter and enhancer regions
PvCDPK11.2	403	408	CAAT-box	common cis-acting element in promoter and enhancer regions
PvCDPK11.2	616	620	CAAT-box
PvCDPK11.2	690	695	CAAT-box	common cis-acting element in promoter and enhancer regions
PvCDPK11.2	696	700	CAAT-box
PvCDPK11.2	779	783	CAAT-box
PvCDPK11.2	807	812	CAAT-box	common cis-acting element in promoter and enhancer regions
PvCDPK11.2	930	935	CAAT-box	common cis-acting element in promoter and enhancer regions
PvCDPK11.2	953	958	CAAT-box	common cis-acting element in promoter and enhancer regions
PvCDPK11.2	1001	1005	CAAT-box
PvCDPK11.2	1196	1200	CAAT-box
PvCDPK11.2	1384	1389	CAAT-box	common cis-acting element in promoter and enhancer regions
PvCDPK11.2	1385	1389	CAAT-box
PvCDPK11.2	1414	1418	CAAT-box
PvCDPK11.2	1557	1562	CAAT-box	common cis-acting element in promoter and enhancer regions
PvCDPK11.2	1558	1562	CAAT-box
PvCDPK11.2	1586	1590	CAAT-box
PvCDPK11.2	1641	1645	CAAT-box
PvCDPK11.2	1736	1741	CAAT-box	common cis-acting element in promoter and enhancer regions
PvCDPK11.2	1760	1764	CAAT-box
PvCDPK11.2	1772	1777	CAAT-box	common cis-acting element in promoter and enhancer regions
PvCDPK11.2	1844	1848	CAAT-box
PvCDPK11.2	1899	1903	CAAT-box
PvCDPK11.2	1917	1921	CAAT-box
PvCDPK11.2	1994	2001	CAAT-box	common cis-acting element in promoter and enhancer regions
PvCDPK11.2	184	190	G-Box	cis-acting regulatory element involved in light responsiveness
PvCDPK11.2	1342	1348	G-Box	cis-acting regulatory element involved in light responsiveness
PvCDPK11.2	1417	1424	MRE	MYB binding site involved in light responsiveness
PvCDPK11.2	364	370	MYB
PvCDPK11.2	538	544	MYB
PvCDPK13	292	299	MRE	MYB binding site involved in light responsiveness
PvCDPK13	240	246	MYB
PvCDPK13	1294	1300	MYB
PvCDPK13	13	17	CAAT-box
PvCDPK13	20	24	CAAT-box
PvCDPK13	41	46	CAAT-box	common cis-acting element in promoter and enhancer regions
PvCDPK13	49	53	CAAT-box
PvCDPK13	65	69	CAAT-box
PvCDPK13	108	112	CAAT-box
PvCDPK13	113	117	CAAT-box
PvCDPK13	180	185	CAAT-box	common cis-acting element in promoter and enhancer regions
PvCDPK13	231	236	CAAT-box	common cis-acting element in promoter and enhancer regions
PvCDPK13	280	285	CAAT-box	common cis-acting element in promoter and enhancer regions
PvCDPK13	283	288	CAAT-box	common cis-acting element in promoter and enhancer regions
PvCDPK13	371	376	CAAT-box	common cis-acting element in promoter and enhancer regions
PvCDPK13	422	426	CAAT-box
PvCDPK13	518	523	CAAT-box	common cis-acting element in promoter and enhancer regions
PvCDPK13	570	575	CAAT-box	common cis-acting element in promoter and enhancer regions
PvCDPK13	676	680	CAAT-box
PvCDPK13	682	686	CAAT-box
PvCDPK13	731	736	CAAT-box	common cis-acting element in promoter and enhancer regions
PvCDPK13	803	807	CAAT-box
PvCDPK13	843	848	CAAT-box	common cis-acting element in promoter and enhancer regions
PvCDPK13	844	848	CAAT-box
PvCDPK13	859	864	CAAT-box	common cis-acting element in promoter and enhancer regions
PvCDPK13	903	908	CAAT-box	common cis-acting element in promoter and enhancer regions
PvCDPK13	1198	1202	CAAT-box
PvCDPK13	1311	1315	CAAT-box
PvCDPK13	1328	1333	CAAT-box	common cis-acting element in promoter and enhancer regions
PvCDPK13	1403	1408	CAAT-box	common cis-acting element in promoter and enhancer regions
PvCDPK13	1424	1429	CAAT-box	common cis-acting element in promoter and enhancer regions
PvCDPK13	1586	1590	CAAT-box
PvCDPK13	1658	1662	CAAT-box
PvCDPK13	1869	1873	CAAT-box
PvCDPK13	1018	1027	AT-rich sequence	element for maximal elicitor-mediated activation (2copies)
PvCDPK13	668	678	AT-rich element	binding site of AT-rich DNA binding protein (ATBP-1)
PvCDPK13	1093	1099	MYB recognition site
PvCDPK13	1724	1728	Unnamed__4
PvCDPK13	1772	1776	Unnamed__4
PvCDPK13	1814	1818	Unnamed__4
PvCDPK13	1955	1959	Unnamed__4
PvCDPK13	1958	1962	Unnamed__4
PvCDPK13	1968	1972	Unnamed__4
PvCDPK13	1973	1977	Unnamed__4
PvCDPK13	1985	1989	Unnamed__4
PvCDPK13	1993	1997	Unnamed__4
PvCDPK13	494	500	Box 4	part of a conserved DNA module involved in light responsiveness
PvCDPK13	566	572	Box 4	part of a conserved DNA module involved in light responsiveness
PvCDPK13	899	905	Box 4	part of a conserved DNA module involved in light responsiveness
PvCDPK13	1007	1013	Box 4	part of a conserved DNA module involved in light responsiveness
PvCDPK13	1192	1198	Box 4	part of a conserved DNA module involved in light responsiveness
PvCDPK13	1516	1522	Box 4	part of a conserved DNA module involved in light responsiveness
PvCDPK13	1679	1685	Box 4	part of a conserved DNA module involved in light responsiveness
PvCDPK13	1683	1689	Box 4	part of a conserved DNA module involved in light responsiveness
PvCDPK13	1008	1019	Unnamed__1	60K protein binding site
PvCDPK13	88	96	ERE
PvCDPK13	532	540	ERE
PvCDPK13	1694	1702	ERE
PvCDPK13	127	131	TATA-box	core promoter element around -30 of transcription start
PvCDPK13	160	166	TATA-box	core promoter element around -30 of transcription start
PvCDPK13	162	166	TATA-box	core promoter element around -30 of transcription start
PvCDPK13	183	189	TATA-box	core promoter element around -30 of transcription start
PvCDPK13	184	188	TATA-box	core promoter element around -30 of transcription start
PvCDPK13	356	361	TATA-box	core promoter element around -30 of transcription start
PvCDPK13	357	361	TATA-box	core promoter element around -30 of transcription start
PvCDPK13	455	459	TATA-box	core promoter element around -30 of transcription start
PvCDPK13	468	475	TATA-box	core promoter element around -30 of transcription start
PvCDPK13	482	489	TATA-box	core promoter element around -30 of transcription start
PvCDPK13	483	489	TATA-box	core promoter element around -30 of transcription start
PvCDPK13	484	489	TATA-box	core promoter element around -30 of transcription start
PvCDPK13	485	489	TATA-box	core promoter element around -30 of transcription start
PvCDPK13	697	703	TATA-box	core promoter element around -30 of transcription start
PvCDPK13	698	704	TATA-box	core promoter element around -30 of transcription start
PvCDPK13	699	705	TATA-box	core promoter element around -30 of transcription start
PvCDPK13	700	704	TATA-box	core promoter element around -30 of transcription start
PvCDPK13	709	717	TATA-box	core promoter element around -30 of transcription start
PvCDPK13	710	717	TATA-box	core promoter element around -30 of transcription start
PvCDPK13	711	717	TATA-box	core promoter element around -30 of transcription start
PvCDPK13	712	717	TATA-box	core promoter element around -30 of transcription start
PvCDPK13	713	717	TATA-box	core promoter element around -30 of transcription start
PvCDPK13	716	722	TATA-box	core promoter element around -30 of transcription start
PvCDPK13	717	722	TATA-box	core promoter element around -30 of transcription start
PvCDPK13	718	722	TATA-box	core promoter element around -30 of transcription start
PvCDPK13	812	819	TATA-box	core promoter element around -30 of transcription start
PvCDPK13	813	819	TATA-box	core promoter element around -30 of transcription start
PvCDPK13	814	819	TATA-box	core promoter element around -30 of transcription start
PvCDPK13	815	819	TATA-box	core promoter element around -30 of transcription start
PvCDPK13	937	943	TATA-box	core promoter element around -30 of transcription start
PvCDPK13	938	943	TATA-box	core promoter element around -30 of transcription start
PvCDPK13	939	943	TATA-box	core promoter element around -30 of transcription start
PvCDPK13	1029	1033	TATA-box	core promoter element around -30 of transcription start
PvCDPK13	1082	1088	TATA-box	core promoter element around -30 of transcription start
PvCDPK13	1083	1087	TATA-box	core promoter element around -30 of transcription start
PvCDPK13	1135	1140	TATA-box	core promoter element around -30 of transcription start
PvCDPK13	1136	1140	TATA-box	core promoter element around -30 of transcription start
PvCDPK13	1142	1150	TATA-box	core promoter element around -30 of transcription start
PvCDPK13	1222	1228	TATA-box	core promoter element around -30 of transcription start
PvCDPK13	1223	1228	TATA-box	core promoter element around -30 of transcription start
PvCDPK13	1224	1228	TATA-box	core promoter element around -30 of transcription start
PvCDPK13	1245	1253	TATA-box	core promoter element around -30 of transcription start
PvCDPK13	1353	1360	TATA-box	core promoter element around -30 of transcription start
PvCDPK13	1354	1360	TATA-box	core promoter element around -30 of transcription start
PvCDPK13	1355	1361	TATA-box	core promoter element around -30 of transcription start
PvCDPK13	1356	1362	TATA-box	core promoter element around -30 of transcription start
PvCDPK13	1357	1363	TATA-box	core promoter element around -30 of transcription start
PvCDPK13	1358	1364	TATA-box	core promoter element around -30 of transcription start
PvCDPK13	1359	1365	TATA-box	core promoter element around -30 of transcription start
PvCDPK13	1360	1366	TATA-box	core promoter element around -30 of transcription start
PvCDPK13	1361	1367	TATA-box	core promoter element around -30 of transcription start
PvCDPK13	1362	1368	TATA-box	core promoter element around -30 of transcription start
PvCDPK13	1363	1369	TATA-box	core promoter element around -30 of transcription start
PvCDPK13	1364	1370	TATA-box	core promoter element around -30 of transcription start
PvCDPK13	1365	1371	TATA-box	core promoter element around -30 of transcription start
PvCDPK13	1366	1372	TATA-box	core promoter element around -30 of transcription start
PvCDPK13	1367	1373	TATA-box	core promoter element around -30 of transcription start
PvCDPK13	1368	1374	TATA-box	core promoter element around -30 of transcription start
PvCDPK13	1369	1375	TATA-box	core promoter element around -30 of transcription start
PvCDPK13	1370	1376	TATA-box	core promoter element around -30 of transcription start
PvCDPK13	1371	1377	TATA-box	core promoter element around -30 of transcription start
PvCDPK13	1372	1378	TATA-box	core promoter element around -30 of transcription start
PvCDPK13	1373	1379	TATA-box	core promoter element around -30 of transcription start
PvCDPK13	1374	1378	TATA-box	core promoter element around -30 of transcription start
PvCDPK13	1380	1386	TATA-box	core promoter element around -30 of transcription start
PvCDPK13	1381	1387	TATA-box	core promoter element around -30 of transcription start
PvCDPK13	1382	1388	TATA-box	core promoter element around -30 of transcription start
PvCDPK13	1384	1388	TATA-box	core promoter element around -30 of transcription start
PvCDPK13	1686	1695	TATA-box	core promoter element around -30 of transcription start
PvCDPK13	1687	1694	TATA-box	core promoter element around -30 of transcription start
PvCDPK13	1688	1694	TATA-box	core promoter element around -30 of transcription start
PvCDPK13	1689	1696	TATA-box	core promoter element around -30 of transcription start
PvCDPK13	1690	1696	TATA-box	core promoter element around -30 of transcription start
PvCDPK13	1691	1697	TATA-box	core promoter element around -30 of transcription start
PvCDPK13	1692	1696	TATA-box	core promoter element around -30 of transcription start
PvCDPK13	226	234	AE-box	part of a module for light response
PvCDPK13	1251	1257	Myb
PvCDPK13	1505	1511	Myb
PvCDPK13	1370	1380	Unnamed__6
PvCDPK13	338	346	WUN-motif
PvCDPK13	1034	1042	WUN-motif
PvCDPK13	811	819	TATA
PvCDPK13	1839	1848	TCA
PvCDPK13	1845	1854	TCA
PvCDPK13	644	651	AAGAA-motif
PvCDPK13	1505	1511	MBS	MYB binding site involved in drought-inducibility
PvCDPK13	240	246	Myb-binding site
PvCDPK13	1294	1300	Myb-binding site
PvCDPK13	507	513	WRE3
PvCDPK13	1877	1886	TCA-element	cis-acting element involved in salicylic acid responsiveness
PvCDPK13	108	116.5	HD-Zip 1	element involved in differentiation of the palisade mesophyll cells
PvCDPK13	1899	1913	telo-box
PvCDPK13	1970	1975	STRE
PvCDPK13	730	736	MYC
PvCDPK13	166	170		short_function
PvCDPK13	255	259		short_function
PvCDPK13	589	593		short_function
PvCDPK13	1072	1076		short_function
PvCDPK13	1462	1466		short_function
PvCDPK13	1601	1605		short_function
PvCDPK13	1812	1816		short_function
PvCDPK13	1820	1824		short_function
PvCDPK13	1847	1851		short_function
PvCDPK13	1953	1957		short_function
PvCDPK13	1983	1987		short_function
PvCDPK13	1093	1099	CCAAT-box	MYBHv1 binding site
PvCDPK13	460	469	G-box	cis-acting regulatory element involved in light responsiveness
PvCDPK13	160	166	AT~TATA-box
PvCDPK13	698	704	AT~TATA-box
PvCDPK13	1354	1360	AT~TATA-box
PvCDPK13	1356	1362	AT~TATA-box
PvCDPK13	1358	1364	AT~TATA-box
PvCDPK13	1360	1366	AT~TATA-box
PvCDPK13	1362	1368	AT~TATA-box
PvCDPK13	1364	1370	AT~TATA-box
PvCDPK13	1366	1372	AT~TATA-box
PvCDPK13	1368	1374	AT~TATA-box
PvCDPK13	1370	1376	AT~TATA-box
PvCDPK13	1372	1378	AT~TATA-box
PvCDPK13	1380	1386	AT~TATA-box
PvCDPK13	1382	1388	AT~TATA-box
PvCDPK13	1688	1696	AT~TATA-box
PvCDPK13	1690	1696	AT~TATA-box
PvCDPK13	1081	1090	ATCT-motif	part of a conserved DNA module involved in light responsiveness
PvCDPK13	240	247	GARE-motif	gibberellin-responsive element
PvCDPK13	1293	1300	GARE-motif	gibberellin-responsive element
PvCDPK13	1002	1008	ARE	cis-acting regulatory element essential for the anaerobic induction
PvCDPK13	1454	1460	ARE	cis-acting regulatory element essential for the anaerobic induction
PvCDPK16	949	954	ABRE	cis-acting element involved in the abscisic acid responsiveness
PvCDPK16	328	334	DRE core
PvCDPK16	151	159	ERE
PvCDPK16	234	242	ERE
PvCDPK16	403	411	ERE
PvCDPK16	528	536	ERE
PvCDPK16	668	676	ERE
PvCDPK16	983	991	ERE
PvCDPK16	567	573	Box 4	part of a conserved DNA module involved in light responsiveness
PvCDPK16	699	705	Box 4	part of a conserved DNA module involved in light responsiveness
PvCDPK16	923	929	Box 4	part of a conserved DNA module involved in light responsiveness
PvCDPK16	1010	1016	Box 4	part of a conserved DNA module involved in light responsiveness
PvCDPK16	1024	1030	Box 4	part of a conserved DNA module involved in light responsiveness
PvCDPK16	1093	1099	Box 4	part of a conserved DNA module involved in light responsiveness
PvCDPK16	1193	1199	Box 4	part of a conserved DNA module involved in light responsiveness
PvCDPK16	1197	1203	Box 4	part of a conserved DNA module involved in light responsiveness
PvCDPK16	548	556	GA-motif	part of a light responsive element
PvCDPK16	1753	1760	Myc
PvCDPK16	217	228	Unnamed__1	60K protein binding site
PvCDPK16	841	845	Unnamed__4
PvCDPK16	1324	1328	Unnamed__4
PvCDPK16	1733	1737	Unnamed__4
PvCDPK16	1827	1831	Unnamed__4
PvCDPK16	1843	1847	Unnamed__4
PvCDPK16	37	42	TATA-box	core promoter element around -30 of transcription start
PvCDPK16	38	42	TATA-box	core promoter element around -30 of transcription start
PvCDPK16	166	172	TATA-box	core promoter element around -30 of transcription start
PvCDPK16	167	171	TATA-box	core promoter element around -30 of transcription start
PvCDPK16	179	183	TATA-box	core promoter element around -30 of transcription start
PvCDPK16	200	207	TATA-box	core promoter element around -30 of transcription start
PvCDPK16	201	207	TATA-box	core promoter element around -30 of transcription start
PvCDPK16	202	207	TATA-box	core promoter element around -30 of transcription start
PvCDPK16	203	207	TATA-box	core promoter element around -30 of transcription start
PvCDPK16	253	262	TATA-box	core promoter element around -30 of transcription start
PvCDPK16	262	268	TATA-box	core promoter element around -30 of transcription start
PvCDPK16	263	269	TATA-box	core promoter element around -30 of transcription start
PvCDPK16	264	270	TATA-box	core promoter element around -30 of transcription start
PvCDPK16	265	269	TATA-box	core promoter element around -30 of transcription start
PvCDPK16	322	328	TATA-box	core promoter element around -30 of transcription start
PvCDPK16	323	328	TATA-box	core promoter element around -30 of transcription start
PvCDPK16	324	328	TATA-box	core promoter element around -30 of transcription start
PvCDPK16	348	354	TATA-box	core promoter element around -30 of transcription start
PvCDPK16	349	353	TATA-box	core promoter element around -30 of transcription start
PvCDPK16	378	384	TATA-box	core promoter element around -30 of transcription start
PvCDPK16	379	383	TATA-box	core promoter element around -30 of transcription start
PvCDPK16	386	398	TATA-box	core promoter element around -30 of transcription start
PvCDPK16	394	400	TATA-box	core promoter element around -30 of transcription start
PvCDPK16	395	401	TATA-box	core promoter element around -30 of transcription start
PvCDPK16	396	402	TATA-box	core promoter element around -30 of transcription start
PvCDPK16	397	401	TATA-box	core promoter element around -30 of transcription start
PvCDPK16	421	425	TATA-box	core promoter element around -30 of transcription start
PvCDPK16	520	527	TATA-box	core promoter element around -30 of transcription start
PvCDPK16	521	527	TATA-box	core promoter element around -30 of transcription start
PvCDPK16	522	527	TATA-box	core promoter element around -30 of transcription start
PvCDPK16	523	527	TATA-box	core promoter element around -30 of transcription start
PvCDPK16	545	551	TATA-box	core promoter element around -30 of transcription start
PvCDPK16	546	551	TATA-box	core promoter element around -30 of transcription start
PvCDPK16	547	551	TATA-box	core promoter element around -30 of transcription start
PvCDPK16	571	577	TATA-box	core promoter element around -30 of transcription start
PvCDPK16	572	576	TATA-box	core promoter element around -30 of transcription start
PvCDPK16	781	789	TATA-box	core promoter element around -30 of transcription start
PvCDPK16	898	904	TATA-box	core promoter element around -30 of transcription start
PvCDPK16	899	904	TATA-box	core promoter element around -30 of transcription start
PvCDPK16	900	904	TATA-box	core promoter element around -30 of transcription start
PvCDPK16	927	933	TATA-box	core promoter element around -30 of transcription start
PvCDPK16	928	932	TATA-box	core promoter element around -30 of transcription start
PvCDPK16	1040	1046	TATA-box	core promoter element around -30 of transcription start
PvCDPK16	1041	1045	TATA-box	core promoter element around -30 of transcription start
PvCDPK16	1049	1055	TATA-box	core promoter element around -30 of transcription start
PvCDPK16	1050	1056	TATA-box	core promoter element around -30 of transcription start
PvCDPK16	1051	1057	TATA-box	core promoter element around -30 of transcription start
PvCDPK16	1052	1056	TATA-box	core promoter element around -30 of transcription start
PvCDPK16	1086	1090	TATA-box	core promoter element around -30 of transcription start
PvCDPK16	1101	1113	TATA-box	core promoter element around -30 of transcription start
PvCDPK16	1103	1109	TATA-box	core promoter element around -30 of transcription start
PvCDPK16	1104	1110	TATA-box	core promoter element around -30 of transcription start
PvCDPK16	1105	1111	TATA-box	core promoter element around -30 of transcription start
PvCDPK16	1106	1112	TATA-box	core promoter element around -30 of transcription start
PvCDPK16	1107	1113	TATA-box	core promoter element around -30 of transcription start
PvCDPK16	1108	1114	TATA-box	core promoter element around -30 of transcription start
PvCDPK16	1109	1115	TATA-box	core promoter element around -30 of transcription start
PvCDPK16	1110	1116	TATA-box	core promoter element around -30 of transcription start
PvCDPK16	1111	1117	TATA-box	core promoter element around -30 of transcription start
PvCDPK16	1112	1118	TATA-box	core promoter element around -30 of transcription start
PvCDPK16	1113	1119	TATA-box	core promoter element around -30 of transcription start
PvCDPK16	1114	1120	TATA-box	core promoter element around -30 of transcription start
PvCDPK16	1115	1121	TATA-box	core promoter element around -30 of transcription start
PvCDPK16	1116	1120	TATA-box	core promoter element around -30 of transcription start
PvCDPK16	1212	1219	TATA-box	core promoter element around -30 of transcription start
PvCDPK16	1213	1219	TATA-box	core promoter element around -30 of transcription start
PvCDPK16	1214	1219	TATA-box	core promoter element around -30 of transcription start
PvCDPK16	1215	1219	TATA-box	core promoter element around -30 of transcription start
PvCDPK16	1555	1561	TATA-box	core promoter element around -30 of transcription start
PvCDPK16	1556	1561	TATA-box	core promoter element around -30 of transcription start
PvCDPK16	1557	1561	TATA-box	core promoter element around -30 of transcription start
PvCDPK16	1566	1570	TATA-box	core promoter element around -30 of transcription start
PvCDPK16	1920	1926	TATA-box	core promoter element around -30 of transcription start
PvCDPK16	1922	1926	TATA-box	core promoter element around -30 of transcription start
PvCDPK16	1505	1511	Myb
PvCDPK16	889	895	TGA-element	auxin-responsive element
PvCDPK16	594	600	MYB
PvCDPK16	949	955	G-Box	cis-acting regulatory element involved in light responsiveness
PvCDPK16	11	16	CAAT-box	common cis-acting element in promoter and enhancer regions
PvCDPK16	24	28	CAAT-box
PvCDPK16	26	31	CAAT-box	common cis-acting element in promoter and enhancer regions
PvCDPK16	96	101	CAAT-box	common cis-acting element in promoter and enhancer regions
PvCDPK16	119	123	CAAT-box
PvCDPK16	164	168	CAAT-box
PvCDPK16	391	396	CAAT-box	common cis-acting element in promoter and enhancer regions
PvCDPK16	426	430	CAAT-box
PvCDPK16	565	569	CAAT-box
PvCDPK16	582	586	CAAT-box
PvCDPK16	613	617	CAAT-box
PvCDPK16	703	708	CAAT-box	common cis-acting element in promoter and enhancer regions
PvCDPK16	734	738	CAAT-box
PvCDPK16	750	754	CAAT-box
PvCDPK16	765	769	CAAT-box
PvCDPK16	850	855	CAAT-box	common cis-acting element in promoter and enhancer regions
PvCDPK16	934	939	CAAT-box	common cis-acting element in promoter and enhancer regions
PvCDPK16	1007	1012	CAAT-box	common cis-acting element in promoter and enhancer regions
PvCDPK16	1100	1105	CAAT-box	common cis-acting element in promoter and enhancer regions
PvCDPK16	1142	1146	CAAT-box
PvCDPK16	1243	1248	CAAT-box	common cis-acting element in promoter and enhancer regions
PvCDPK16	1277	1282	CAAT-box	common cis-acting element in promoter and enhancer regions
PvCDPK16	1330	1334	CAAT-box
PvCDPK16	1334	1339	CAAT-box	common cis-acting element in promoter and enhancer regions
PvCDPK16	1367	1371	CAAT-box
PvCDPK16	1499	1504	CAAT-box	common cis-acting element in promoter and enhancer regions
PvCDPK16	1572	1577	CAAT-box	common cis-acting element in promoter and enhancer regions
PvCDPK16	1653	1657	CAAT-box
PvCDPK16	1662	1667	CAAT-box	common cis-acting element in promoter and enhancer regions
PvCDPK16	1870	1874	CAAT-box
PvCDPK16	1898	1902	CAAT-box
PvCDPK16	1944	1949	CAAT-box	common cis-acting element in promoter and enhancer regions
PvCDPK16	1945	1949	CAAT-box
PvCDPK16	1791	1797	WRE3
PvCDPK16	1798	1804	WRE3
PvCDPK16	844	852	LAMP-element	part of a light responsive element
PvCDPK16	1593	1599	GT1-motif	light responsive element
PvCDPK16	1586	1596.5	MBSI	MYB binding site involved in flavonoid biosynthetic genes regulation
PvCDPK16	1305	1314	TCA-element	cis-acting element involved in salicylic acid responsiveness
PvCDPK16	1143	1149	W box
PvCDPK16	1781	1787	W box
PvCDPK16	11	17	MYC
PvCDPK16	24	30	MYC
PvCDPK16	617	623	MYC
PvCDPK16	957	961		short_function
PvCDPK16	1324	1328		short_function
PvCDPK16	1346	1350		short_function
PvCDPK16	1488	1492		short_function
PvCDPK16	1713	1717		short_function
PvCDPK16	1731	1735		short_function
PvCDPK16	1465	1470	STRE
PvCDPK16	263	269	AT~TATA-box
PvCDPK16	395	401	AT~TATA-box
PvCDPK16	1050	1056	AT~TATA-box
PvCDPK16	1104	1110	AT~TATA-box
PvCDPK16	1106	1112	AT~TATA-box
PvCDPK16	1108	1114	AT~TATA-box
PvCDPK16	1110	1116	AT~TATA-box
PvCDPK16	1112	1118	AT~TATA-box
PvCDPK16	1114	1120	AT~TATA-box
PvCDPK16	141	147	TCT-motif	part of a light responsive element
PvCDPK16	471	477	TCT-motif	part of a light responsive element
PvCDPK16	593	600	GARE-motif	gibberellin-responsive element
PvCDPK16	970	976	ARE	cis-acting regulatory element essential for the anaerobic induction
PvCDPK16	1670	1676	ARE	cis-acting regulatory element essential for the anaerobic induction
PvCDPK16	1941	1947	ARE	cis-acting regulatory element essential for the anaerobic induction
PvCDPK16	572	580	TATA
PvCDPK16	122	129	AAGAA-motif
PvCDPK16	1832	1839	AAGAA-motif
PvCDPK16	225	233	chs-CMA1a	part of a light responsive element
PvCDPK16	467	475	chs-CMA1a	part of a light responsive element
PvCDPK16	711	719	chs-CMA1a	part of a light responsive element
PvCDPK16	594	600	Myb-binding site
PvCDPK16	1133	1140	GCN4_motif	cis-regulatory element involved in endosperm expression
PvCDPK17.1	1317	1326	TC-rich repeats	cis-acting element involved in defense and stress responsiveness
PvCDPK17.1	1665	1674	TC-rich repeats	cis-acting element involved in defense and stress responsiveness
PvCDPK17.1	1028	1033	Unnamed__1
PvCDPK17.1	1142	1148	Box 4	part of a conserved DNA module involved in light responsiveness
PvCDPK17.1	1879	1885	Box 4	part of a conserved DNA module involved in light responsiveness
PvCDPK17.1	1389	1397	GA-motif	part of a light responsive element
PvCDPK17.1	1066	1075	ACE	cis-acting element involved in light responsiveness
PvCDPK17.1	92	99	Myc
PvCDPK17.1	11	15	Unnamed__4
PvCDPK17.1	48	52	Unnamed__4
PvCDPK17.1	86	90	Unnamed__4
PvCDPK17.1	331	335	Unnamed__4
PvCDPK17.1	370	374	Unnamed__4
PvCDPK17.1	379	383	Unnamed__4
PvCDPK17.1	409	413	Unnamed__4
PvCDPK17.1	530	534	Unnamed__4
PvCDPK17.1	580	584	Unnamed__4
PvCDPK17.1	1199	1203	Unnamed__4
PvCDPK17.1	1223	1227	Unnamed__4
PvCDPK17.1	1480	1484	Unnamed__4
PvCDPK17.1	1573	1577	Unnamed__4
PvCDPK17.1	1642	1646	Unnamed__4
PvCDPK17.1	1807	1811	Unnamed__4
PvCDPK17.1	1902	1906	Unnamed__4
PvCDPK17.1	1948	1952	Unnamed__4
PvCDPK17.1	1983	1987	Unnamed__4
PvCDPK17.1	1987	1991	Unnamed__4
PvCDPK17.1	1997	2001	Unnamed__4
PvCDPK17.1	1027	1032	ABRE	cis-acting element involved in the abscisic acid responsiveness
PvCDPK17.1	1620	1626	ABRE	cis-acting element involved in the abscisic acid responsiveness
PvCDPK17.1	1621	1626	ABRE	cis-acting element involved in the abscisic acid responsiveness
PvCDPK17.1	1187	1193	Myb
PvCDPK17.1	416	424	AE-box	part of a module for light response
PvCDPK17.1	386	390	TATA-box	core promoter element around -30 of transcription start
PvCDPK17.1	859	863	TATA-box	core promoter element around -30 of transcription start
PvCDPK17.1	888	894	TATA-box	core promoter element around -30 of transcription start
PvCDPK17.1	889	894	TATA-box	core promoter element around -30 of transcription start
PvCDPK17.1	890	894	TATA-box	core promoter element around -30 of transcription start
PvCDPK17.1	930	942	TATA-box	core promoter element around -30 of transcription start
PvCDPK17.1	932	940	TATA-box	core promoter element around -30 of transcription start
PvCDPK17.1	933	940	TATA-box	core promoter element around -30 of transcription start
PvCDPK17.1	934	940	TATA-box	core promoter element around -30 of transcription start
PvCDPK17.1	935	940	TATA-box	core promoter element around -30 of transcription start
PvCDPK17.1	936	940	TATA-box	core promoter element around -30 of transcription start
PvCDPK17.1	1035	1043	TATA-box	core promoter element around -30 of transcription start
PvCDPK17.1	1047	1053	TATA-box	core promoter element around -30 of transcription start
PvCDPK17.1	1048	1053	TATA-box	core promoter element around -30 of transcription start
PvCDPK17.1	1049	1053	TATA-box	core promoter element around -30 of transcription start
PvCDPK17.1	1056	1061	TATA-box	core promoter element around -30 of transcription start
PvCDPK17.1	1057	1061	TATA-box	core promoter element around -30 of transcription start
PvCDPK17.1	1078	1082	TATA-box	core promoter element around -30 of transcription start
PvCDPK17.1	1138	1142	TATA-box	core promoter element around -30 of transcription start
PvCDPK17.1	1151	1160	TATA-box	core promoter element around -30 of transcription start
PvCDPK17.1	1152	1158	TATA-box	core promoter element around -30 of transcription start
PvCDPK17.1	1153	1157	TATA-box	core promoter element around -30 of transcription start
PvCDPK17.1	1290	1297	TATA-box	core promoter element around -30 of transcription start
PvCDPK17.1	1307	1314	TATA-box	core promoter element around -30 of transcription start
PvCDPK17.1	1308	1314	TATA-box	core promoter element around -30 of transcription start
PvCDPK17.1	1309	1315	TATA-box	core promoter element around -30 of transcription start
PvCDPK17.1	1310	1314	TATA-box	core promoter element around -30 of transcription start
PvCDPK17.1	1381	1385	TATA-box	core promoter element around -30 of transcription start
PvCDPK17.1	1527	1533	TATA-box	core promoter element around -30 of transcription start
PvCDPK17.1	1528	1532	TATA-box	core promoter element around -30 of transcription start
PvCDPK17.1	1546	1552	TATA-box	core promoter element around -30 of transcription start
PvCDPK17.1	1547	1551	TATA-box	core promoter element around -30 of transcription start
PvCDPK17.1	1906	1913	TATA-box	core promoter element around -30 of transcription start
PvCDPK17.1	1907	1913	TATA-box	core promoter element around -30 of transcription start
PvCDPK17.1	1908	1914	TATA-box	core promoter element around -30 of transcription start
PvCDPK17.1	1909	1913	TATA-box	core promoter element around -30 of transcription start
PvCDPK17.1	378	385	TCCC-motif	part of a light responsive element
PvCDPK17.1	1596	1607	AuxRE	part of an auxin-responsive element
PvCDPK17.1	1026	1032	G-Box	cis-acting regulatory element involved in light responsiveness
PvCDPK17.1	1620	1626	G-Box	cis-acting regulatory element involved in light responsiveness
PvCDPK17.1	5	10	CAAT-box	common cis-acting element in promoter and enhancer regions
PvCDPK17.1	40	44	CAAT-box
PvCDPK17.1	44	48	CAAT-box
PvCDPK17.1	141	146	CAAT-box	common cis-acting element in promoter and enhancer regions
PvCDPK17.1	200	205	CAAT-box	common cis-acting element in promoter and enhancer regions
PvCDPK17.1	216	220	CAAT-box
PvCDPK17.1	399	403	CAAT-box
PvCDPK17.1	540	545	CAAT-box	common cis-acting element in promoter and enhancer regions
PvCDPK17.1	551	555	CAAT-box
PvCDPK17.1	984	989	CAAT-box	common cis-acting element in promoter and enhancer regions
PvCDPK17.1	1062	1066	CAAT-box
PvCDPK17.1	1075	1079	CAAT-box
PvCDPK17.1	1242	1247	CAAT-box	common cis-acting element in promoter and enhancer regions
PvCDPK17.1	1303	1307	CAAT-box
PvCDPK17.1	1335	1339	CAAT-box
PvCDPK17.1	1463	1468	CAAT-box	common cis-acting element in promoter and enhancer regions
PvCDPK17.1	1476	1481	CAAT-box	common cis-acting element in promoter and enhancer regions
PvCDPK17.1	1601	1605	CAAT-box
PvCDPK17.1	1678	1683	CAAT-box	common cis-acting element in promoter and enhancer regions
PvCDPK17.1	1849	1853	CAAT-box
PvCDPK17.1	1873	1878	CAAT-box	common cis-acting element in promoter and enhancer regions
PvCDPK17.1	1874	1878	CAAT-box
PvCDPK17.1	599	605	TGA-element	auxin-responsive element
PvCDPK17.1	1611	1617	MYB
PvCDPK17.1	141	147	MYC
PvCDPK17.1	168	174	MYC
PvCDPK17.1	539	545	MYC
PvCDPK17.1	974	980	MYC
PvCDPK17.1	984	990	MYC
PvCDPK17.1	1242	1248	MYC
PvCDPK17.1	1678	1684	MYC
PvCDPK17.1	126	130		short_function
PvCDPK17.1	131	135		short_function
PvCDPK17.1	136	140		short_function
PvCDPK17.1	171	175		short_function
PvCDPK17.1	177	181		short_function
PvCDPK17.1	377	381		short_function
PvCDPK17.1	429	433		short_function
PvCDPK17.1	463	467		short_function
PvCDPK17.1	479	483		short_function
PvCDPK17.1	496	500		short_function
PvCDPK17.1	528	532		short_function
PvCDPK17.1	578	582		short_function
PvCDPK17.1	612	616		short_function
PvCDPK17.1	679	683		short_function
PvCDPK17.1	726	730		short_function
PvCDPK17.1	762	766		short_function
PvCDPK17.1	834	838		short_function
PvCDPK17.1	926	930		short_function
PvCDPK17.1	1117	1121		short_function
PvCDPK17.1	1194	1198		short_function
PvCDPK17.1	1414	1418		short_function
PvCDPK17.1	1585	1589		short_function
PvCDPK17.1	1946	1950		short_function
PvCDPK17.1	1995	1999		short_function
PvCDPK17.1	242	247	STRE
PvCDPK17.1	1570	1575	STRE
PvCDPK17.1	1688	1693	STRE
PvCDPK17.1	630	636	WRE3
PvCDPK17.1	1605	1619	telo-box
PvCDPK17.1	551	560	O2-site	cis-acting regulatory element involved in zein metabolism regulation
PvCDPK17.1	1030	1036	ARE	cis-acting regulatory element essential for the anaerobic induction
PvCDPK17.1	1721	1727	ARE	cis-acting regulatory element essential for the anaerobic induction
PvCDPK17.1	1975	1981	ARE	cis-acting regulatory element essential for the anaerobic induction
PvCDPK17.1	1308	1314	AT~TATA-box
PvCDPK17.1	1907	1913	AT~TATA-box
PvCDPK17.1	1024	1032	G-box	cis-acting regulatory element involved in light responsiveness
PvCDPK17.1	1620	1626	G-box	cis-acting regulatory element involved in light responsiveness
PvCDPK17.1	683	689	TCT-motif	part of a light responsive element
PvCDPK17.1	1611	1617	MYB-like sequence
PvCDPK17.1	1153	1163	Unnamed__6
PvCDPK17.1	1187	1193	MBS	MYB binding site involved in drought-inducibility
PvCDPK17.1	1575	1581	LTR	cis-acting element involved in low-temperature responsiveness
PvCDPK17.1	1547	1555	TATA
PvCDPK17.1	497	506	TCA
PvCDPK17.2	600	606	Myb
PvCDPK17.2	1599	1605	Myb
PvCDPK17.2	86	90	TATA-box	core promoter element around -30 of transcription start
PvCDPK17.2	332	338	TATA-box	core promoter element around -30 of transcription start
PvCDPK17.2	333	338	TATA-box	core promoter element around -30 of transcription start
PvCDPK17.2	334	338	TATA-box	core promoter element around -30 of transcription start
PvCDPK17.2	437	443	TATA-box	core promoter element around -30 of transcription start
PvCDPK17.2	439	443	TATA-box	core promoter element around -30 of transcription start
PvCDPK17.2	463	469	TATA-box	core promoter element around -30 of transcription start
PvCDPK17.2	464	469	TATA-box	core promoter element around -30 of transcription start
PvCDPK17.2	465	469	TATA-box	core promoter element around -30 of transcription start
PvCDPK17.2	570	579	TATA-box	core promoter element around -30 of transcription start
PvCDPK17.2	572	576	TATA-box	core promoter element around -30 of transcription start
PvCDPK17.2	580	584	TATA-box	core promoter element around -30 of transcription start
PvCDPK17.2	616	622	TATA-box	core promoter element around -30 of transcription start
PvCDPK17.2	618	624	TATA-box	core promoter element around -30 of transcription start
PvCDPK17.2	619	625	TATA-box	core promoter element around -30 of transcription start
PvCDPK17.2	620	624	TATA-box	core promoter element around -30 of transcription start
PvCDPK17.2	666	673	TATA-box	core promoter element around -30 of transcription start
PvCDPK17.2	667	673	TATA-box	core promoter element around -30 of transcription start
PvCDPK17.2	668	673	TATA-box	core promoter element around -30 of transcription start
PvCDPK17.2	669	673	TATA-box	core promoter element around -30 of transcription start
PvCDPK17.2	741	746	TATA-box	core promoter element around -30 of transcription start
PvCDPK17.2	742	746	TATA-box	core promoter element around -30 of transcription start
PvCDPK17.2	795	799	TATA-box	core promoter element around -30 of transcription start
PvCDPK17.2	903	909	TATA-box	core promoter element around -30 of transcription start
PvCDPK17.2	904	908	TATA-box	core promoter element around -30 of transcription start
PvCDPK17.2	977	984	TATA-box	core promoter element around -30 of transcription start
PvCDPK17.2	978	984	TATA-box	core promoter element around -30 of transcription start
PvCDPK17.2	979	984	TATA-box	core promoter element around -30 of transcription start
PvCDPK17.2	980	984	TATA-box	core promoter element around -30 of transcription start
PvCDPK17.2	986	993	TATA-box	core promoter element around -30 of transcription start
PvCDPK17.2	987	993	TATA-box	core promoter element around -30 of transcription start
PvCDPK17.2	988	993	TATA-box	core promoter element around -30 of transcription start
PvCDPK17.2	989	993	TATA-box	core promoter element around -30 of transcription start
PvCDPK17.2	1132	1140	TATA-box	core promoter element around -30 of transcription start
PvCDPK17.2	1213	1219	TATA-box	core promoter element around -30 of transcription start
PvCDPK17.2	1214	1218	TATA-box	core promoter element around -30 of transcription start
PvCDPK17.2	1297	1304	TATA-box	core promoter element around -30 of transcription start
PvCDPK17.2	1298	1304	TATA-box	core promoter element around -30 of transcription start
PvCDPK17.2	1299	1305	TATA-box	core promoter element around -30 of transcription start
PvCDPK17.2	1300	1304	TATA-box	core promoter element around -30 of transcription start
PvCDPK17.2	1932	1936	TATA-box	core promoter element around -30 of transcription start
PvCDPK17.2	1983	1990	TCCC-motif	part of a light responsive element
PvCDPK17.2	655	663	ERE
PvCDPK17.2	698	706	ERE
PvCDPK17.2	451	457	Box 4	part of a conserved DNA module involved in light responsiveness
PvCDPK17.2	455	461	Box 4	part of a conserved DNA module involved in light responsiveness
PvCDPK17.2	459	465	Box 4	part of a conserved DNA module involved in light responsiveness
PvCDPK17.2	583	589	Box 4	part of a conserved DNA module involved in light responsiveness
PvCDPK17.2	611	617	Box 4	part of a conserved DNA module involved in light responsiveness
PvCDPK17.2	928	934	Box 4	part of a conserved DNA module involved in light responsiveness
PvCDPK17.2	1011	1017	Box 4	part of a conserved DNA module involved in light responsiveness
PvCDPK17.2	1162	1168	Box 4	part of a conserved DNA module involved in light responsiveness
PvCDPK17.2	78	85	Myc
PvCDPK17.2	539	546	Myc
PvCDPK17.2	123	127	Unnamed__4
PvCDPK17.2	563	567	Unnamed__4
PvCDPK17.2	1674	1678	Unnamed__4
PvCDPK17.2	1876	1880	Unnamed__4
PvCDPK17.2	1962	1966	Unnamed__4
PvCDPK17.2	1984	1988	Unnamed__4
PvCDPK17.2	881	890	TC-rich repeats	cis-acting element involved in defense and stress responsiveness
PvCDPK17.2	1377	1386	TC-rich repeats	cis-acting element involved in defense and stress responsiveness
PvCDPK17.2	1241	1254	AT1-motif	part of a light responsive module
PvCDPK17.2	489	495	MYB recognition site
PvCDPK17.2	1969	1976	P-box	gibberellin-responsive element
PvCDPK17.2	1516	1524.5	AC-I
PvCDPK17.2	70	75	CAAT-box	common cis-acting element in promoter and enhancer regions
PvCDPK17.2	134	138	CAAT-box
PvCDPK17.2	185	189	CAAT-box
PvCDPK17.2	200	204	CAAT-box
PvCDPK17.2	223	228	CAAT-box	common cis-acting element in promoter and enhancer regions
PvCDPK17.2	235	240	CAAT-box	common cis-acting element in promoter and enhancer regions
PvCDPK17.2	303	308	CAAT-box	common cis-acting element in promoter and enhancer regions
PvCDPK17.2	326	331	CAAT-box	common cis-acting element in promoter and enhancer regions
PvCDPK17.2	401	406	CAAT-box	common cis-acting element in promoter and enhancer regions
PvCDPK17.2	482	486	CAAT-box
PvCDPK17.2	680	684	CAAT-box
PvCDPK17.2	718	722	CAAT-box
PvCDPK17.2	761	766	CAAT-box	common cis-acting element in promoter and enhancer regions
PvCDPK17.2	767	771	CAAT-box
PvCDPK17.2	925	930	CAAT-box	common cis-acting element in promoter and enhancer regions
PvCDPK17.2	947	951	CAAT-box
PvCDPK17.2	961	965	CAAT-box
PvCDPK17.2	1005	1010	CAAT-box	common cis-acting element in promoter and enhancer regions
PvCDPK17.2	1105	1109	CAAT-box
PvCDPK17.2	1109	1113	CAAT-box
PvCDPK17.2	1159	1164	CAAT-box	common cis-acting element in promoter and enhancer regions
PvCDPK17.2	1180	1185	CAAT-box	common cis-acting element in promoter and enhancer regions
PvCDPK17.2	1252	1256	CAAT-box
PvCDPK17.2	1256	1261	CAAT-box	common cis-acting element in promoter and enhancer regions
PvCDPK17.2	1397	1401	CAAT-box
PvCDPK17.2	1528	1532	CAAT-box
PvCDPK17.2	1603	1613	CAAT-box	common cis-acting element in promoter and enhancer regions
PvCDPK17.2	1686	1690	CAAT-box
PvCDPK17.2	1791	1796	CAAT-box	common cis-acting element in promoter and enhancer regions
PvCDPK17.2	1818	1822	CAAT-box
PvCDPK17.2	1886	1890	CAAT-box
PvCDPK17.2	1912	1917	CAAT-box	common cis-acting element in promoter and enhancer regions
PvCDPK17.2	258	264	MYB
PvCDPK17.2	308	314	MYB
PvCDPK17.2	1608	1614	MYB
PvCDPK17.2	1681	1687	MYB
PvCDPK17.2	413	419	ARE	cis-acting regulatory element essential for the anaerobic induction
PvCDPK17.2	502	508	ARE	cis-acting regulatory element essential for the anaerobic induction
PvCDPK17.2	1354	1360	TCT-motif	part of a light responsive element
PvCDPK17.2	1377	1383	TCT-motif	part of a light responsive element
PvCDPK17.2	618	624	AT~TATA-box
PvCDPK17.2	1298	1304	AT~TATA-box
PvCDPK17.2	489	495	CCAAT-box	MYBHv1 binding site
PvCDPK17.2	1005	1011	MYC
PvCDPK17.2	1179	1185	MYC
PvCDPK17.2	1265	1271	MYC
PvCDPK17.2	18	22		short_function
PvCDPK17.2	167	171		short_function
PvCDPK17.2	1662	1666		short_function
PvCDPK17.2	1759	1763		short_function
PvCDPK17.2	1874	1878		short_function
PvCDPK17.2	1935	1939		short_function
PvCDPK17.2	1979	1983		short_function
PvCDPK17.2	1855	1860	STRE
PvCDPK17.2	1967	1972	STRE
PvCDPK17.2	1194	1200	W box
PvCDPK17.2	1625	1631	W box
PvCDPK17.2	1926	1932	W box
PvCDPK17.2	309	315	GT1-motif	light responsive element
PvCDPK17.2	311	317	GT1-motif	light responsive element
PvCDPK17.2	588	598.5	MBSI	MYB binding site involved in flavonoid biosynthetic genes regulation
PvCDPK17.2	782	788	WRE3
PvCDPK17.2	1515	1521	WRE3
PvCDPK17.2	1772	1778	WRE3
PvCDPK17.2	1921	1927	WRE3
PvCDPK17.2	320	327	AAGAA-motif
PvCDPK17.2	665	673	TATA
PvCDPK17.2	308	314	MYB-like sequence
PvCDPK2	159	169	Unnamed__6
PvCDPK2	1333	1340	DRE1
PvCDPK2	874	883	WUN-motif
PvCDPK2	1280	1286	CCGTCC motif
PvCDPK2	857	863	MYB-like sequence
PvCDPK2	833	841	TATA
PvCDPK2	625	634	TCA
PvCDPK2	1505	1514	TCA
PvCDPK2	24	32	chs-CMA1a	part of a light responsive element
PvCDPK2	189	196	AAGAA-motif
PvCDPK2	1366	1372	Myb-binding site
PvCDPK2	1415	1421	WRE3
PvCDPK2	1444	1450	WRE3
PvCDPK2	33	42	ATC-motif	part of a conserved DNA module involved in light responsiveness
PvCDPK2	1215	1221	W box
PvCDPK2	254	260	MYC
PvCDPK2	271	277	MYC
PvCDPK2	588	594	MYC
PvCDPK2	963	969	MYC
PvCDPK2	995	1001	MYC
PvCDPK2	1290	1296	MYC
PvCDPK2	1683	1689	MYC
PvCDPK2	1706	1712	MYC
PvCDPK2	1942	1948	MYC
PvCDPK2	302	306		short_function
PvCDPK2	416	420		short_function
PvCDPK2	627	631		short_function
PvCDPK2	633	637		short_function
PvCDPK2	777	781		short_function
PvCDPK2	934	938		short_function
PvCDPK2	962	966		short_function
PvCDPK2	969	973		short_function
PvCDPK2	1073	1077		short_function
PvCDPK2	1090	1094		short_function
PvCDPK2	1176	1180		short_function
PvCDPK2	1406	1410		short_function
PvCDPK2	1507	1511		short_function
PvCDPK2	1789	1793		short_function
PvCDPK2	1938	1947.5	Gap-box	part of a light responsive element
PvCDPK2	653	659	G-box	cis-acting regulatory element involved in light responsiveness
PvCDPK2	848	856	G-box	cis-acting regulatory element involved in light responsiveness
PvCDPK2	849	855	G-box	cis-acting regulatory element involved in light responsiveness
PvCDPK2	1241	1247	G-box	cis-acting regulatory element involved in light responsiveness
PvCDPK2	485	491	AT~TATA-box
PvCDPK2	1476	1485	GATA-motif	part of a light responsive element
PvCDPK2	1366	1373	GARE-motif	gibberellin-responsive element
PvCDPK2	82	88	ARE	cis-acting regulatory element essential for the anaerobic induction
PvCDPK2	508	514	ARE	cis-acting regulatory element essential for the anaerobic induction
PvCDPK2	791	797	ARE	cis-acting regulatory element essential for the anaerobic induction
PvCDPK2	1431	1437	ARE	cis-acting regulatory element essential for the anaerobic induction
PvCDPK2	1946	1952	ARE	cis-acting regulatory element essential for the anaerobic induction
PvCDPK2	261	267	MYB
PvCDPK2	853	859	MYB
PvCDPK2	857	863	MYB
PvCDPK2	1366	1372	MYB
PvCDPK2	1238	1244	TGA-element	auxin-responsive element
PvCDPK2	1659	1665	TGA-element	auxin-responsive element
PvCDPK2	653	659	G-Box	cis-acting regulatory element involved in light responsiveness
PvCDPK2	952	958	G-Box	cis-acting regulatory element involved in light responsiveness
PvCDPK2	849	855	ABRE4
PvCDPK2	47	51	CAAT-box
PvCDPK2	73	78	CAAT-box	common cis-acting element in promoter and enhancer regions
PvCDPK2	377	381	CAAT-box
PvCDPK2	413	417	CAAT-box
PvCDPK2	420	424	CAAT-box
PvCDPK2	444	448	CAAT-box
PvCDPK2	557	561	CAAT-box
PvCDPK2	588	592	CAAT-box
PvCDPK2	590	594	CAAT-box
PvCDPK2	602	607	CAAT-box	common cis-acting element in promoter and enhancer regions
PvCDPK2	607	612	CAAT-box	common cis-acting element in promoter and enhancer regions
PvCDPK2	620	625	CAAT-box	common cis-acting element in promoter and enhancer regions
PvCDPK2	638	642	CAAT-box
PvCDPK2	674	678	CAAT-box
PvCDPK2	694	699	CAAT-box	common cis-acting element in promoter and enhancer regions
PvCDPK2	699	703	CAAT-box
PvCDPK2	788	792	CAAT-box
PvCDPK2	809	817	CAAT-box	common cis-acting element in promoter and enhancer regions
PvCDPK2	811	816	CAAT-box	common cis-acting element in promoter and enhancer regions
PvCDPK2	817	822	CAAT-box	common cis-acting element in promoter and enhancer regions
PvCDPK2	829	834	CAAT-box	common cis-acting element in promoter and enhancer regions
PvCDPK2	904	908	CAAT-box
PvCDPK2	919	924	CAAT-box	common cis-acting element in promoter and enhancer regions
PvCDPK2	925	930	CAAT-box	common cis-acting element in promoter and enhancer regions
PvCDPK2	976	981	CAAT-box	common cis-acting element in promoter and enhancer regions
PvCDPK2	989	993	CAAT-box
PvCDPK2	995	999	CAAT-box
PvCDPK2	997	1001	CAAT-box
PvCDPK2	1049	1054	CAAT-box	common cis-acting element in promoter and enhancer regions
PvCDPK2	1060	1065	CAAT-box	common cis-acting element in promoter and enhancer regions
PvCDPK2	1065	1069	CAAT-box
PvCDPK2	1193	1197	CAAT-box
PvCDPK2	1211	1215	CAAT-box
PvCDPK2	1213	1218	CAAT-box	common cis-acting element in promoter and enhancer regions
PvCDPK2	1270	1275	CAAT-box	common cis-acting element in promoter and enhancer regions
PvCDPK2	1289	1294	CAAT-box	common cis-acting element in promoter and enhancer regions
PvCDPK2	1290	1294	CAAT-box
PvCDPK2	1292	1296	CAAT-box
PvCDPK2	1544	1548	CAAT-box
PvCDPK2	1683	1687	CAAT-box
PvCDPK2	1685	1689	CAAT-box
PvCDPK2	1690	1694	CAAT-box
PvCDPK2	1843	1847	CAAT-box
PvCDPK2	1943	1948	CAAT-box	common cis-acting element in promoter and enhancer regions
PvCDPK2	849	855	ABRE3a
PvCDPK2	653	659	ABRE	cis-acting element involved in the abscisic acid responsiveness
PvCDPK2	654	659	ABRE	cis-acting element involved in the abscisic acid responsiveness
PvCDPK2	850	855	ABRE	cis-acting element involved in the abscisic acid responsiveness
PvCDPK2	953	958	ABRE	cis-acting element involved in the abscisic acid responsiveness
PvCDPK2	1242	1247	ABRE	cis-acting element involved in the abscisic acid responsiveness
PvCDPK2	1280	1286	CCGTCC-box
PvCDPK2	525	534	TC-rich repeats	cis-acting element involved in defense and stress responsiveness
PvCDPK2	367	371	Unnamed__4
PvCDPK2	1287	1291	Unnamed__4
PvCDPK2	1313	1317	Unnamed__4
PvCDPK2	1363	1367	Unnamed__4
PvCDPK2	1393	1397	Unnamed__4
PvCDPK2	1441	1445	Unnamed__4
PvCDPK2	1504	1508	Unnamed__4
PvCDPK2	1903	1907	Unnamed__4
PvCDPK2	1981	1985	Unnamed__4
PvCDPK2	851	856	Unnamed__1
PvCDPK2	426	432	Box 4	part of a conserved DNA module involved in light responsiveness
PvCDPK2	456	462	Box 4	part of a conserved DNA module involved in light responsiveness
PvCDPK2	894	900	Box 4	part of a conserved DNA module involved in light responsiveness
PvCDPK2	1032	1038	Box 4	part of a conserved DNA module involved in light responsiveness
PvCDPK2	4	8	TATA-box	core promoter element around -30 of transcription start
PvCDPK2	65	70	TATA-box	core promoter element around -30 of transcription start
PvCDPK2	66	70	TATA-box	core promoter element around -30 of transcription start
PvCDPK2	105	113	TATA-box	core promoter element around -30 of transcription start
PvCDPK2	130	136	TATA-box	core promoter element around -30 of transcription start
PvCDPK2	131	135	TATA-box	core promoter element around -30 of transcription start
PvCDPK2	213	217	TATA-box	core promoter element around -30 of transcription start
PvCDPK2	245	251	TATA-box	core promoter element around -30 of transcription start
PvCDPK2	246	251	TATA-box	core promoter element around -30 of transcription start
PvCDPK2	247	251	TATA-box	core promoter element around -30 of transcription start
PvCDPK2	315	321	TATA-box	core promoter element around -30 of transcription start
PvCDPK2	317	321	TATA-box	core promoter element around -30 of transcription start
PvCDPK2	408	413	TATA-box	core promoter element around -30 of transcription start
PvCDPK2	409	413	TATA-box	core promoter element around -30 of transcription start
PvCDPK2	452	458	TATA-box	core promoter element around -30 of transcription start
PvCDPK2	453	457	TATA-box	core promoter element around -30 of transcription start
PvCDPK2	485	491	TATA-box	core promoter element around -30 of transcription start
PvCDPK2	486	492	TATA-box	core promoter element around -30 of transcription start
PvCDPK2	487	491	TATA-box	core promoter element around -30 of transcription start
PvCDPK2	529	533	TATA-box	core promoter element around -30 of transcription start
PvCDPK2	559	565	TATA-box	core promoter element around -30 of transcription start
PvCDPK2	561	565	TATA-box	core promoter element around -30 of transcription start
PvCDPK2	712	720	TATA-box	core promoter element around -30 of transcription start
PvCDPK2	756	760	TATA-box	core promoter element around -30 of transcription start
PvCDPK2	794	801	TATA-box	core promoter element around -30 of transcription start
PvCDPK2	795	801	TATA-box	core promoter element around -30 of transcription start
PvCDPK2	796	801	TATA-box	core promoter element around -30 of transcription start
PvCDPK2	797	801	TATA-box	core promoter element around -30 of transcription start
PvCDPK2	832	838	TATA-box	core promoter element around -30 of transcription start
PvCDPK2	833	837	TATA-box	core promoter element around -30 of transcription start
PvCDPK2	860	865	TATA-box	core promoter element around -30 of transcription start
PvCDPK2	861	865	TATA-box	core promoter element around -30 of transcription start
PvCDPK2	1037	1043	TATA-box	core promoter element around -30 of transcription start
PvCDPK2	1039	1043	TATA-box	core promoter element around -30 of transcription start
PvCDPK2	1821	1825	TATA-box	core promoter element around -30 of transcription start
PvCDPK2	1959	1964	TATA-box	core promoter element around -30 of transcription start
PvCDPK2	1960	1964	TATA-box	core promoter element around -30 of transcription start
PvCDPK2	1280	1286	A-box	cis-acting regulatory element
PvCDPK20	1625	1634	WUN-motif
PvCDPK20	1423	1441	Unnamed__5	SEF1 factor binding site
PvCDPK20	525	531	LTR	cis-acting element involved in low-temperature responsiveness
PvCDPK20	631	639	TATA
PvCDPK20	653	661	TATA
PvCDPK20	473	480	AAGAA-motif
PvCDPK20	1584	1591	AAGAA-motif
PvCDPK20	1292	1300	chs-CMA1a	part of a light responsive element
PvCDPK20	267	273	CAT-box	cis-acting regulatory element related to meristem expression
PvCDPK20	506	512	MBS	MYB binding site involved in drought-inducibility
PvCDPK20	1	10	TCA-element	cis-acting element involved in salicylic acid responsiveness
PvCDPK20	514	523	TCA-element	cis-acting element involved in salicylic acid responsiveness
PvCDPK20	1046	1055	TCA-element	cis-acting element involved in salicylic acid responsiveness
PvCDPK20	203	209	GT1-motif	light responsive element
PvCDPK20	1725	1732	GT1-motif	light responsive element
PvCDPK20	1726	1732	GT1-motif	light responsive element
PvCDPK20	75	80	STRE
PvCDPK20	306	312	MYC
PvCDPK20	1736	1742	MYC
PvCDPK20	4	8		short_function
PvCDPK20	53	57		short_function
PvCDPK20	88	92		short_function
PvCDPK20	181	185		short_function
PvCDPK20	477	481		short_function
PvCDPK20	515	519		short_function
PvCDPK20	704	708		short_function
PvCDPK20	797	801		short_function
PvCDPK20	811	815		short_function
PvCDPK20	1481	1485		short_function
PvCDPK20	1656	1660		short_function
PvCDPK20	1797	1801		short_function
PvCDPK20	1826	1830		short_function
PvCDPK20	1882	1886		short_function
PvCDPK20	362	368	TCT-motif	part of a light responsive element
PvCDPK20	1631	1639	RY-element	cis-acting regulatory element involved in seed-specific regulation
PvCDPK20	1635	1643	RY-element	cis-acting regulatory element involved in seed-specific regulation
PvCDPK20	1569	1577	chs-CMA2a	part of a light responsive element
PvCDPK20	207	213	ARE	cis-acting regulatory element essential for the anaerobic induction
PvCDPK20	429	435	ARE	cis-acting regulatory element essential for the anaerobic induction
PvCDPK20	1648	1654	ARE	cis-acting regulatory element essential for the anaerobic induction
PvCDPK20	1917	1923	ARE	cis-acting regulatory element essential for the anaerobic induction
PvCDPK20	107	111	CAAT-box
PvCDPK20	305	310	CAAT-box	common cis-acting element in promoter and enhancer regions
PvCDPK20	306	310	CAAT-box
PvCDPK20	308	312	CAAT-box
PvCDPK20	338	343	CAAT-box	common cis-acting element in promoter and enhancer regions
PvCDPK20	341	345	CAAT-box
PvCDPK20	358	363	CAAT-box	common cis-acting element in promoter and enhancer regions
PvCDPK20	455	459	CAAT-box
PvCDPK20	469	473	CAAT-box
PvCDPK20	547	552	CAAT-box	common cis-acting element in promoter and enhancer regions
PvCDPK20	794	799	CAAT-box	common cis-acting element in promoter and enhancer regions
PvCDPK20	829	833	CAAT-box
PvCDPK20	871	876	CAAT-box	common cis-acting element in promoter and enhancer regions
PvCDPK20	872	876	CAAT-box
PvCDPK20	927	931	CAAT-box
PvCDPK20	968	972	CAAT-box
PvCDPK20	998	1002	CAAT-box
PvCDPK20	1023	1028	CAAT-box	common cis-acting element in promoter and enhancer regions
PvCDPK20	1070	1075	CAAT-box	common cis-acting element in promoter and enhancer regions
PvCDPK20	1100	1105	CAAT-box	common cis-acting element in promoter and enhancer regions
PvCDPK20	1105	1110	CAAT-box	common cis-acting element in promoter and enhancer regions
PvCDPK20	1114	1118	CAAT-box
PvCDPK20	1209	1213	CAAT-box
PvCDPK20	1321	1326	CAAT-box	common cis-acting element in promoter and enhancer regions
PvCDPK20	1322	1326	CAAT-box
PvCDPK20	1410	1415	CAAT-box	common cis-acting element in promoter and enhancer regions
PvCDPK20	1421	1425	CAAT-box
PvCDPK20	1516	1520	CAAT-box
PvCDPK20	1525	1530	CAAT-box	common cis-acting element in promoter and enhancer regions
PvCDPK20	1544	1548	CAAT-box
PvCDPK20	1617	1621	CAAT-box
PvCDPK20	1687	1691	CAAT-box
PvCDPK20	1698	1702	CAAT-box
PvCDPK20	1722	1727	CAAT-box	common cis-acting element in promoter and enhancer regions
PvCDPK20	1737	1742	CAAT-box	common cis-acting element in promoter and enhancer regions
PvCDPK20	1764	1769	CAAT-box	common cis-acting element in promoter and enhancer regions
PvCDPK20	1765	1769	CAAT-box
PvCDPK20	1786	1791	CAAT-box	common cis-acting element in promoter and enhancer regions
PvCDPK20	1858	1863	CAAT-box	common cis-acting element in promoter and enhancer regions
PvCDPK20	1930	1934	CAAT-box
PvCDPK20	1938	1943	CAAT-box	common cis-acting element in promoter and enhancer regions
PvCDPK20	237	244	P-box	gibberellin-responsive element
PvCDPK20	413	420	P-box	gibberellin-responsive element
PvCDPK20	67	71	Unnamed__4
PvCDPK20	232	236	Unnamed__4
PvCDPK20	292	296	Unnamed__4
PvCDPK20	370	374	Unnamed__4
PvCDPK20	935	939	Unnamed__4
PvCDPK20	1826	1830	Unnamed__4
PvCDPK20	1841	1845	Unnamed__4
PvCDPK20	1882	1886	Unnamed__4
PvCDPK20	1895	1899	Unnamed__4
PvCDPK20	1759	1764	Unnamed__1
PvCDPK20	1822	1827	Unnamed__1
PvCDPK20	961	969	ERE
PvCDPK20	134	140	Box 4	part of a conserved DNA module involved in light responsiveness
PvCDPK20	673	679	Box 4	part of a conserved DNA module involved in light responsiveness
PvCDPK20	758	764	Box 4	part of a conserved DNA module involved in light responsiveness
PvCDPK20	1064	1070	Box 4	part of a conserved DNA module involved in light responsiveness
PvCDPK20	1406	1412	Box 4	part of a conserved DNA module involved in light responsiveness
PvCDPK20	1561	1567	Box 4	part of a conserved DNA module involved in light responsiveness
PvCDPK20	273	277	TATA-box	core promoter element around -30 of transcription start
PvCDPK20	403	409	TATA-box	core promoter element around -30 of transcription start
PvCDPK20	404	409	TATA-box	core promoter element around -30 of transcription start
PvCDPK20	405	409	TATA-box	core promoter element around -30 of transcription start
PvCDPK20	624	630	TATA-box	core promoter element around -30 of transcription start
PvCDPK20	625	630	TATA-box	core promoter element around -30 of transcription start
PvCDPK20	626	630	TATA-box	core promoter element around -30 of transcription start
PvCDPK20	630	636	TATA-box	core promoter element around -30 of transcription start
PvCDPK20	631	635	TATA-box	core promoter element around -30 of transcription start
PvCDPK20	638	644	TATA-box	core promoter element around -30 of transcription start
PvCDPK20	640	644	TATA-box	core promoter element around -30 of transcription start
PvCDPK20	652	658	TATA-box	core promoter element around -30 of transcription start
PvCDPK20	653	657	TATA-box	core promoter element around -30 of transcription start
PvCDPK20	659	665	TATA-box	core promoter element around -30 of transcription start
PvCDPK20	660	664	TATA-box	core promoter element around -30 of transcription start
PvCDPK20	711	716	TATA-box	core promoter element around -30 of transcription start
PvCDPK20	712	716	TATA-box	core promoter element around -30 of transcription start
PvCDPK20	716	722	TATA-box	core promoter element around -30 of transcription start
PvCDPK20	717	721	TATA-box	core promoter element around -30 of transcription start
PvCDPK20	726	732	TATA-box	core promoter element around -30 of transcription start
PvCDPK20	727	731	TATA-box	core promoter element around -30 of transcription start
PvCDPK20	746	750	TATA-box	core promoter element around -30 of transcription start
PvCDPK20	775	780	TATA-box	core promoter element around -30 of transcription start
PvCDPK20	776	780	TATA-box	core promoter element around -30 of transcription start
PvCDPK20	786	791	TATA-box	core promoter element around -30 of transcription start
PvCDPK20	787	791	TATA-box	core promoter element around -30 of transcription start
PvCDPK20	834	841	TATA-box	core promoter element around -30 of transcription start
PvCDPK20	837	843	TATA-box	core promoter element around -30 of transcription start
PvCDPK20	839	843	TATA-box	core promoter element around -30 of transcription start
PvCDPK20	860	866	TATA-box	core promoter element around -30 of transcription start
PvCDPK20	861	865	TATA-box	core promoter element around -30 of transcription start
PvCDPK20	890	896	TATA-box	core promoter element around -30 of transcription start
PvCDPK20	891	896	TATA-box	core promoter element around -30 of transcription start
PvCDPK20	892	896	TATA-box	core promoter element around -30 of transcription start
PvCDPK20	899	905	TATA-box	core promoter element around -30 of transcription start
PvCDPK20	900	904	TATA-box	core promoter element around -30 of transcription start
PvCDPK20	929	935	TATA-box	core promoter element around -30 of transcription start
PvCDPK20	930	934	TATA-box	core promoter element around -30 of transcription start
PvCDPK20	1056	1062	TATA-box	core promoter element around -30 of transcription start
PvCDPK20	1058	1062	TATA-box	core promoter element around -30 of transcription start
PvCDPK20	1073	1079	TATA-box	core promoter element around -30 of transcription start
PvCDPK20	1074	1079	TATA-box	core promoter element around -30 of transcription start
PvCDPK20	1075	1079	TATA-box	core promoter element around -30 of transcription start
PvCDPK20	1086	1090	TATA-box	core promoter element around -30 of transcription start
PvCDPK20	1145	1151	TATA-box	core promoter element around -30 of transcription start
PvCDPK20	1146	1151	TATA-box	core promoter element around -30 of transcription start
PvCDPK20	1147	1151	TATA-box	core promoter element around -30 of transcription start
PvCDPK20	1172	1176	TATA-box	core promoter element around -30 of transcription start
PvCDPK20	1202	1210	TATA-box	core promoter element around -30 of transcription start
PvCDPK20	1222	1228	TATA-box	core promoter element around -30 of transcription start
PvCDPK20	1223	1228	TATA-box	core promoter element around -30 of transcription start
PvCDPK20	1224	1228	TATA-box	core promoter element around -30 of transcription start
PvCDPK20	1228	1234	TATA-box	core promoter element around -30 of transcription start
PvCDPK20	1229	1233	TATA-box	core promoter element around -30 of transcription start
PvCDPK20	1245	1249	TATA-box	core promoter element around -30 of transcription start
PvCDPK20	1324	1331	TATA-box	core promoter element around -30 of transcription start
PvCDPK20	1325	1331	TATA-box	core promoter element around -30 of transcription start
PvCDPK20	1326	1331	TATA-box	core promoter element around -30 of transcription start
PvCDPK20	1327	1331	TATA-box	core promoter element around -30 of transcription start
PvCDPK20	1362	1368	TATA-box	core promoter element around -30 of transcription start
PvCDPK20	1363	1368	TATA-box	core promoter element around -30 of transcription start
PvCDPK20	1364	1368	TATA-box	core promoter element around -30 of transcription start
PvCDPK20	1385	1391	TATA-box	core promoter element around -30 of transcription start
PvCDPK20	1386	1390	TATA-box	core promoter element around -30 of transcription start
PvCDPK20	1430	1436	TATA-box	core promoter element around -30 of transcription start
PvCDPK20	1431	1435	TATA-box	core promoter element around -30 of transcription start
PvCDPK20	1439	1447	TATA-box	core promoter element around -30 of transcription start
PvCDPK20	1485	1491	TATA-box	core promoter element around -30 of transcription start
PvCDPK20	1486	1490	TATA-box	core promoter element around -30 of transcription start
PvCDPK20	1497	1501	TATA-box	core promoter element around -30 of transcription start
PvCDPK20	1671	1679	AE-box	part of a module for light response
PvCDPK20	506	512	Myb
PvCDPK21	318	324	ARE	cis-acting regulatory element essential for the anaerobic induction
PvCDPK21	1412	1419	GARE-motif	gibberellin-responsive element
PvCDPK21	1132	1137	as-1
PvCDPK21	463	472	ATCT-motif	part of a conserved DNA module involved in light responsiveness
PvCDPK21	487	496	ATCT-motif	part of a conserved DNA module involved in light responsiveness
PvCDPK21	766	772	TCT-motif	part of a light responsive element
PvCDPK21	579	585	G-box	cis-acting regulatory element involved in light responsiveness
PvCDPK21	582	588	G-box	cis-acting regulatory element involved in light responsiveness
PvCDPK21	712	722	G-box	cis-acting regulatory element involved in light responsiveness
PvCDPK21	715	721	G-box	cis-acting regulatory element involved in light responsiveness
PvCDPK21	828	834	MYC
PvCDPK21	879	885	MYC
PvCDPK21	1045	1051	MYC
PvCDPK21	1669	1675	MYC
PvCDPK21	655	659		short_function
PvCDPK21	674	678		short_function
PvCDPK21	1081	1085		short_function
PvCDPK21	1181	1185		short_function
PvCDPK21	1335	1339		short_function
PvCDPK21	1367	1371		short_function
PvCDPK21	1492	1496		short_function
PvCDPK21	1637	1641		short_function
PvCDPK21	1674	1678		short_function
PvCDPK21	1954	1958		short_function
PvCDPK21	1964	1968		short_function
PvCDPK21	1972	1976		short_function
PvCDPK21	87	92	STRE
PvCDPK21	213	219	W box
PvCDPK21	127	133	Myb-binding site
PvCDPK21	1413	1419	Myb-binding site
PvCDPK21	22	30	plant_AP-2-like	?
PvCDPK21	1009	1016	GCN4_motif	cis-regulatory element involved in endosperm expression
PvCDPK21	1793	1801	chs-CMA1a	part of a light responsive element
PvCDPK21	1639	1647	I-box	part of a light responsive element
PvCDPK21	1137	1146	TCA
PvCDPK21	1017	1025	TATA
PvCDPK21	1132	1137	TGACG-motif	cis-acting regulatory element involved in the MeJA-responsiveness
PvCDPK21	1229	1237	AE-box	part of a module for light response
PvCDPK21	401	409	TATA-box	core promoter element around -30 of transcription start
PvCDPK21	889	893	TATA-box	core promoter element around -30 of transcription start
PvCDPK21	914	919	TATA-box	core promoter element around -30 of transcription start
PvCDPK21	915	919	TATA-box	core promoter element around -30 of transcription start
PvCDPK21	949	955	TATA-box	core promoter element around -30 of transcription start
PvCDPK21	950	955	TATA-box	core promoter element around -30 of transcription start
PvCDPK21	951	955	TATA-box	core promoter element around -30 of transcription start
PvCDPK21	976	983	TATA-box	core promoter element around -30 of transcription start
PvCDPK21	977	983	TATA-box	core promoter element around -30 of transcription start
PvCDPK21	978	983	TATA-box	core promoter element around -30 of transcription start
PvCDPK21	979	983	TATA-box	core promoter element around -30 of transcription start
PvCDPK21	1018	1025	TATA-box	core promoter element around -30 of transcription start
PvCDPK21	1019	1025	TATA-box	core promoter element around -30 of transcription start
PvCDPK21	1020	1025	TATA-box	core promoter element around -30 of transcription start
PvCDPK21	1021	1025	TATA-box	core promoter element around -30 of transcription start
PvCDPK21	1315	1322	TATA-box	core promoter element around -30 of transcription start
PvCDPK21	1477	1483	TATA-box	core promoter element around -30 of transcription start
PvCDPK21	1478	1482	TATA-box	core promoter element around -30 of transcription start
PvCDPK21	1506	1514	TATA-box	core promoter element around -30 of transcription start
PvCDPK21	1514	1520	TATA-box	core promoter element around -30 of transcription start
PvCDPK21	1515	1520	TATA-box	core promoter element around -30 of transcription start
PvCDPK21	1516	1520	TATA-box	core promoter element around -30 of transcription start
PvCDPK21	1563	1569	TATA-box	core promoter element around -30 of transcription start
PvCDPK21	1564	1568	TATA-box	core promoter element around -30 of transcription start
PvCDPK21	1603	1609	TATA-box	core promoter element around -30 of transcription start
PvCDPK21	1604	1608	TATA-box	core promoter element around -30 of transcription start
PvCDPK21	1802	1808	TATA-box	core promoter element around -30 of transcription start
PvCDPK21	1803	1808	TATA-box	core promoter element around -30 of transcription start
PvCDPK21	1804	1808	TATA-box	core promoter element around -30 of transcription start
PvCDPK21	563	568	Unnamed__1
PvCDPK21	578	583	Unnamed__1
PvCDPK21	597	602	Unnamed__1
PvCDPK21	1508	1516	ERE
PvCDPK21	600	604	Unnamed__4
PvCDPK21	752	756	Unnamed__4
PvCDPK21	772	776	Unnamed__4
PvCDPK21	1083	1087	Unnamed__4
PvCDPK21	1645	1649	Unnamed__4
PvCDPK21	1674	1678	Unnamed__4
PvCDPK21	1687	1691	Unnamed__4
PvCDPK21	1956	1960	Unnamed__4
PvCDPK21	1966	1970	Unnamed__4
PvCDPK21	1977	1981	Unnamed__4
PvCDPK21	1401	1410	circadian	cis-acting regulatory element involved in circadian control
[truncated: 2,244 more rows]

## Sheet: Cis_Acting2
Gene	Start	End	Element
PvCDPK1.1	242	250	ABRE
PvCDPK1.1	243	248	ABRE
PvCDPK1.1	576	581	ABRE
PvCDPK1.1	1885	1891	ABRE
PvCDPK1.1	1886	1891	ABRE
PvCDPK1.1	1131	1140	WUN-motif
PvCDPK1.1	1258	1264	WRE3
PvCDPK1.1	6	11	STRE
PvCDPK1.1	1309	1315	MYC
PvCDPK1.1	1359	1365	Myb
PvCDPK1.1	1486	1493	Myc
PvCDPK1.2	1389	1396	Myc
PvCDPK1.2	1387	1396	TC-rich repeats
PvCDPK1.2	1357	1363	Myb
PvCDPK1.2	1608	1614	Myb
PvCDPK1.2	714	719	STRE
PvCDPK1.2	1667	1672	STRE
PvCDPK1.2	1462	1468	W box
PvCDPK1.2	1175	1183	WUN-motif
PvCDPK1.2	1357	1363	MBS
PvCDPK1.2	1608	1614	MBS
PvCDPK2	653	659	ABRE
PvCDPK2	654	659	ABRE
PvCDPK2	850	855	ABRE
PvCDPK2	953	958	ABRE
PvCDPK2	1242	1247	ABRE
PvCDPK2	874	883	WUN-motif
PvCDPK2	857	863	MYB-like sequence
PvCDPK2	1366	1372	Myb-binding site
PvCDPK2	1415	1421	WRE3
PvCDPK2	1444	1450	WRE3
PvCDPK2	1215	1221	W box
PvCDPK2	254	260	MYC
PvCDPK2	271	277	MYC
PvCDPK2	588	594	MYC
PvCDPK2	963	969	MYC
PvCDPK2	995	1001	MYC
PvCDPK2	1290	1296	MYC
PvCDPK2	1683	1689	MYC
PvCDPK2	1706	1712	MYC
PvCDPK2	1942	1948	MYC
PvCDPK2	261	267	MYB
PvCDPK2	853	859	MYB
PvCDPK2	857	863	MYB
PvCDPK2	1366	1372	MYB
PvCDPK2	525	534	TC-rich repeats
PvCDPK3.1	1532	1541	TC-rich repeats
PvCDPK3.1	257	264	Myc
PvCDPK3.1	903	909	Myb
PvCDPK3.1	1814	1820	Myb
PvCDPK3.1	1963	1969	Myb
PvCDPK3.1	200	206	MYB
PvCDPK3.1	627	633	MYB
PvCDPK3.1	1857	1863	MYB
PvCDPK3.1	1313	1319	MYC
PvCDPK3.1	736	741	as-1
PvCDPK3.1	478	487	WUN-motif
PvCDPK3.1	200	206	MYB-like sequence
PvCDPK3.1	1683	1689	LTR
PvCDPK3.1	627	633	Myb-binding site
PvCDPK3.1	1963	1969	MBS
PvCDPK3.2	1742	1748	Myb
PvCDPK3.2	557	563	MYB
PvCDPK3.2	943	949	MYB
PvCDPK3.2	1949	1955	MYB
PvCDPK3.2	1988	1994	W box
PvCDPK3.2	124	130	MYC
PvCDPK3.2	802	808	MYC
PvCDPK3.2	1060	1066	MYC
PvCDPK3.2	1070	1076	MYC
PvCDPK3.2	1147	1153	WRE3
PvCDPK3.2	1907	1913	WRE3
PvCDPK3.2	943	949	Myb-binding site
PvCDPK3.2	603	612	WUN-motif
PvCDPK4.1	1534	1539	STRE
PvCDPK4.1	213	219	MYC
PvCDPK4.1	1345	1351	W box
PvCDPK4.1	1709	1715	MYB-like sequence
PvCDPK4.1	1326	1335	WUN-motif
PvCDPK4.1	335	341	MBS
PvCDPK4.1	1315	1324	TC-rich repeats
PvCDPK4.1	335	341	Myb
PvCDPK4.1	505	511	Myb
PvCDPK4.1	678	684	MYB
PvCDPK4.1	1709	1715	MYB
PvCDPK4.1	1766	1772	MYB
PvCDPK4.2	390	395	ABRE
PvCDPK4.2	727	732	ABRE
PvCDPK4.2	1806	1811	ABRE
PvCDPK4.2	253	259	Myb
PvCDPK4.2	300	306	Myb
PvCDPK4.2	1542	1548	Myb
PvCDPK4.2	907	914	Myc
PvCDPK4.2	1206	1212	MYB
PvCDPK4.2	1227	1233	MYB
PvCDPK4.2	1865	1871	MYB
PvCDPK4.2	711	716	STRE
PvCDPK4.2	834	839	STRE
PvCDPK4.2	96	102	MYC
PvCDPK4.2	593	599	MYC
PvCDPK4.2	1049	1055	MYC
PvCDPK4.2	1170	1176	MYC
PvCDPK4.2	1529	1535	W box
PvCDPK4.2	471	477	WRE3
PvCDPK4.2	253	259	MBS
PvCDPK4.2	300	306	MBS
PvCDPK4.2	1865	1871	MYB-like sequence
PvCDPK4.2	38	46	WUN-motif
PvCDPK4.2	817	826	WUN-motif
PvCDPK6	581	586	ABRE
PvCDPK6	1094	1099	ABRE
PvCDPK6	363	369	WRE3
PvCDPK6	1491	1497	WRE3
PvCDPK6	189	195	MYC
PvCDPK6	223	229	MYC
PvCDPK6	625	631	MYC
PvCDPK6	1931	1936	STRE
PvCDPK6	1945	1950	STRE
PvCDPK6	1767	1772	as-1
PvCDPK6	1887	1892	as-1
PvCDPK6	87	93	MYB-like sequence
PvCDPK6	1047	1053	MYB-like sequence
PvCDPK6	1810	1817	Myc
PvCDPK6	375	384	TC-rich repeats
PvCDPK6	87	93	MYB
PvCDPK6	1047	1053	MYB
PvCDPK8	1030	1035	ABRE
PvCDPK8	1199	1205	MYC
PvCDPK8	1958	1964	MYC
PvCDPK8	391	397	LTR
PvCDPK8	863	869	Myb
PvCDPK9	858	863	ABRE
PvCDPK9	946	954	ABRE
PvCDPK9	947	952	ABRE
PvCDPK9	953	962	ABRE
PvCDPK9	955	961	ABRE
PvCDPK9	956	961	ABRE
PvCDPK9	304	310	W box
PvCDPK9	307	313	MYC
PvCDPK9	728	734	MYC
PvCDPK9	1485	1491	MYC
PvCDPK9	1991	1996	as-1
PvCDPK9	1327	1336	WUN-motif
PvCDPK9	1746	1752	MYB-like sequence
PvCDPK9	1737	1743	MBS
PvCDPK9	1737	1743	Myb
PvCDPK9	1746	1752	MYB
PvCDPK10.1	1349	1354	ABRE
PvCDPK10.1	1126	1132	MYB
PvCDPK10.1	1847	1854	Myc
PvCDPK10.1	1300	1306	MYB recognition site
PvCDPK10.1	623	628	as-1
PvCDPK10.1	1147	1152	as-1
PvCDPK10.1	1987	1992	as-1
PvCDPK10.1	1300	1306	CCAAT-box
PvCDPK10.1	1016	1022	W box
PvCDPK10.1	369	374	STRE
PvCDPK10.1	865	870	STRE
PvCDPK10.1	44	50	MYC
PvCDPK10.1	188	194	MYC
PvCDPK10.1	512	518	MYC
PvCDPK10.1	1084	1090	MYC
PvCDPK10.1	1261	1267	MYC
PvCDPK10.1	1968	1974	WRE3
PvCDPK10.2	1590	1596	ABRE
PvCDPK10.2	1591	1596	ABRE
PvCDPK10.2	948	954	MYC
PvCDPK10.2	996	1002	MYC
PvCDPK10.2	1706	1712	MYC
PvCDPK10.2	328	333	STRE
PvCDPK10.2	1536	1541	STRE
PvCDPK10.2	667	673	MYB-like sequence
PvCDPK10.2	1188	1194	MBS
PvCDPK10.2	923	930	Myc
PvCDPK10.2	1351	1358	Myc
PvCDPK10.2	1188	1194	Myb
PvCDPK10.2	667	673	MYB
PvCDPK11.1	62	67	ABRE
PvCDPK11.1	640	645	ABRE
PvCDPK11.1	93	99	CCAAT-box
PvCDPK11.1	104	110	MYC
PvCDPK11.1	545	551	MYC
PvCDPK11.1	1443	1449	MYC
PvCDPK11.1	1808	1813	STRE
PvCDPK11.1	1897	1903	WRE3
PvCDPK11.1	1952	1958	Myb-binding site
PvCDPK11.1	1528	1534	MBS
PvCDPK11.1	549	555	MYB-like sequence
PvCDPK11.1	316	322	Myb
PvCDPK11.1	1528	1534	Myb
PvCDPK11.1	1553	1559	Myb
PvCDPK11.1	1949	1955	Myb
PvCDPK11.1	93	99	MYB recognition site
PvCDPK11.1	549	555	MYB
PvCDPK11.1	1952	1958	MYB
PvCDPK11.2	184	190	ABRE
PvCDPK11.2	185	190	ABRE
PvCDPK11.2	1343	1348	ABRE
PvCDPK11.2	1305	1310	as-1
PvCDPK11.2	1739	1744	as-1
PvCDPK11.2	952	958	MYC
PvCDPK11.2	812	818	WRE3
PvCDPK11.2	364	370	MYB-like sequence
PvCDPK11.2	1069	1078	TC-rich repeats
PvCDPK11.2	1751	1760	TC-rich repeats
PvCDPK11.2	364	370	MYB
PvCDPK11.2	538	544	MYB
PvCDPK13	240	246	MYB
PvCDPK13	1294	1300	MYB
PvCDPK13	1093	1099	MYB recognition site
PvCDPK13	1251	1257	Myb
PvCDPK13	1505	1511	Myb
PvCDPK13	338	346	WUN-motif
PvCDPK13	1034	1042	WUN-motif
PvCDPK13	1505	1511	MBS
PvCDPK13	240	246	Myb-binding site
PvCDPK13	1294	1300	Myb-binding site
PvCDPK13	507	513	WRE3
PvCDPK13	1970	1975	STRE
PvCDPK13	730	736	MYC
PvCDPK13	1093	1099	CCAAT-box
PvCDPK16	949	954	ABRE
PvCDPK16	1753	1760	Myc
PvCDPK16	1505	1511	Myb
PvCDPK16	594	600	MYB
PvCDPK16	1791	1797	WRE3
PvCDPK16	1798	1804	WRE3
PvCDPK16	1143	1149	W box
PvCDPK16	1781	1787	W box
PvCDPK16	11	17	MYC
PvCDPK16	24	30	MYC
PvCDPK16	617	623	MYC
PvCDPK16	1465	1470	STRE
PvCDPK16	594	600	Myb-binding site
PvCDPK17.1	1027	1032	ABRE
PvCDPK17.1	1620	1626	ABRE
PvCDPK17.1	1621	1626	ABRE
PvCDPK17.1	1317	1326	TC-rich repeats
PvCDPK17.1	1665	1674	TC-rich repeats
PvCDPK17.1	92	99	Myc
PvCDPK17.1	1187	1193	Myb
PvCDPK17.1	1611	1617	MYB
PvCDPK17.1	141	147	MYC
PvCDPK17.1	168	174	MYC
PvCDPK17.1	539	545	MYC
PvCDPK17.1	974	980	MYC
PvCDPK17.1	984	990	MYC
PvCDPK17.1	1242	1248	MYC
PvCDPK17.1	1678	1684	MYC
PvCDPK17.1	242	247	STRE
PvCDPK17.1	1570	1575	STRE
PvCDPK17.1	1688	1693	STRE
PvCDPK17.1	630	636	WRE3
PvCDPK17.1	1611	1617	MYB-like sequence
PvCDPK17.1	1187	1193	MBS
PvCDPK17.1	1575	1581	LTR
PvCDPK17.2	600	606	Myb
PvCDPK17.2	1599	1605	Myb
PvCDPK17.2	78	85	Myc
PvCDPK17.2	539	546	Myc
PvCDPK17.2	881	890	TC-rich repeats
PvCDPK17.2	1377	1386	TC-rich repeats
PvCDPK17.2	489	495	MYB recognition site
PvCDPK17.2	258	264	MYB
PvCDPK17.2	308	314	MYB
PvCDPK17.2	1608	1614	MYB
PvCDPK17.2	1681	1687	MYB
PvCDPK17.2	489	495	CCAAT-box
PvCDPK17.2	1005	1011	MYC
PvCDPK17.2	1179	1185	MYC
PvCDPK17.2	1265	1271	MYC
PvCDPK17.2	1855	1860	STRE
PvCDPK17.2	1967	1972	STRE
PvCDPK17.2	1194	1200	W box
PvCDPK17.2	1625	1631	W box
PvCDPK17.2	1926	1932	W box
PvCDPK17.2	782	788	WRE3
PvCDPK17.2	1515	1521	WRE3
PvCDPK17.2	1772	1778	WRE3
PvCDPK17.2	1921	1927	WRE3
PvCDPK17.2	308	314	MYB-like sequence
PvCDPK20	1625	1634	WUN-motif
PvCDPK20	525	531	LTR
PvCDPK20	506	512	MBS
PvCDPK20	75	80	STRE
PvCDPK20	306	312	MYC
PvCDPK20	1736	1742	MYC
PvCDPK20	506	512	Myb
PvCDPK21	583	588	ABRE
PvCDPK21	596	601	ABRE
PvCDPK21	715	720	ABRE
PvCDPK21	1132	1137	as-1
PvCDPK21	828	834	MYC
PvCDPK21	879	885	MYC
PvCDPK21	1045	1051	MYC
PvCDPK21	1669	1675	MYC
PvCDPK21	87	92	STRE
PvCDPK21	213	219	W box
PvCDPK21	127	133	Myb-binding site
PvCDPK21	1413	1419	Myb-binding site
PvCDPK21	127	133	MYB
PvCDPK21	565	571	MYB
PvCDPK21	1413	1419	MYB
PvCDPK24	705	713	ABRE
PvCDPK24	707	712	ABRE
PvCDPK24	1578	1583	ABRE
PvCDPK24	95	101	MYB
PvCDPK24	319	325	MYB
PvCDPK24	1652	1658	MYB
PvCDPK24	1567	1573	W box
PvCDPK24	165	170	STRE
PvCDPK24	1812	1817	STRE
PvCDPK24	224	232	WUN-motif
PvCDPK24	1652	1658	Myb-binding site
PvCDPK28	512	518	MYB
PvCDPK28	1679	1685	MYB
PvCDPK28	548	554	MYB recognition site
PvCDPK28	1219	1226	Myc
PvCDPK28	1830	1839	TC-rich repeats
PvCDPK28	1679	1685	MYB-like sequence
PvCDPK28	1558	1567	WUN-motif
PvCDPK28	548	554	CCAAT-box
PvCDPK28	314	320	MYC
PvCDPK28	537	543	MYC
PvCDPK28	539	545	MYC
PvCDPK28	653	659	MYC
PvCDPK28	850	856	MYC
PvCDPK28	1896	1902	MYC
PvCDPK28	472	477	STRE
PvCDPK28	1751	1756	STRE
PvCDPK28	1766	1771	STRE
PvCDPK28	1785	1790	STRE
PvCDPK28	1866	1871	STRE
PvCDPK29.1	305	311	MYC
PvCDPK29.1	536	542	MYC
PvCDPK29.1	757	763	MYC
PvCDPK29.1	1855	1861	MYC
PvCDPK29.1	703	709	CCAAT-box
PvCDPK29.1	302	307	as-1
PvCDPK29.1	425	430	as-1
PvCDPK29.1	1014	1020	MYB-like sequence
PvCDPK29.1	1328	1334	MYB-like sequence
PvCDPK29.1	1185	1194	WUN-motif
PvCDPK29.1	264	270	MBS
PvCDPK29.1	703	709	MYB recognition site
PvCDPK29.1	264	270	Myb
PvCDPK29.1	973	979	Myb
PvCDPK29.1	1493	1499	Myb
PvCDPK29.1	1883	1889	Myb
PvCDPK29.1	1014	1020	MYB
PvCDPK29.1	1328	1334	MYB
PvCDPK29.2	23	29	MYB
PvCDPK29.2	249	255	MYB
PvCDPK29.2	878	884	MYB
PvCDPK29.2	1994	2000	MYB
PvCDPK29.2	37	43	Myb
PvCDPK29.2	798	804	Myb
PvCDPK29.2	345	354	TC-rich repeats
PvCDPK29.2	37	43	MBS
PvCDPK29.2	23	29	Myb-binding site
PvCDPK29.2	1994	2000	Myb-binding site
PvCDPK29.2	1200	1209	WUN-motif
PvCDPK29.2	249	255	MYB-like sequence
PvCDPK29.2	943	948	STRE
PvCDPK29.2	182	188	MYC
PvCDPK29.2	891	897	MYC
PvCDPK29.2	1973	1979	MYC
PvCDPK32	798	803	ABRE
PvCDPK32	1890	1895	ABRE
PvCDPK32	1092	1099	Myc
PvCDPK32	46	52	MYB
PvCDPK32	1886	1892	MYB
PvCDPK32	1711	1717	W box
PvCDPK32	128	133	STRE
PvCDPK32	1737	1742	STRE
PvCDPK32	205	211	MYC
PvCDPK32	581	587	MYC
PvCDPK32	746	752	MYC
PvCDPK32	1935	1941	MYC
PvCDPK32	115	121	WRE3
PvCDPK32	1362	1368	WRE3
PvCDPK32	1233	1241	WUN-motif
PvCDPK32	46	52	MYB-like sequence

## Sheet: Cis_Acting3
	Data number: Element	Column Labels
	Line Labels	ABRE	as-1	CCAAT-box	LTR	MBS	Myb	MYB recognition site	Myb-binding site	MYB-like sequence	MYC	STRE	TC-rich repeats	W box	WRE3	WUN-motif	Total
	PvCDPK1.1	5					1				2	1			1	1	11
	PvCDPK1.2					2	2				1	2	1	1		1	10
	PvCDPK10.1	1	3	1			1	1			6	2		1	1		17
	PvCDPK10.2	2				1	2			1	5	2					13
	PvCDPK11.1	2		1		1	6	1	1	1	3	1			1		18
	PvCDPK11.2	3	2				2			1	1		2		1		12
	PvCDPK13			1		1	4	1	2		1	1			1	2	14
	PvCDPK16	1					2		1		4	1		2	2		13
	PvCDPK17.1	3			1	1	2			1	8	3	2		1		22
	PvCDPK17.2			1			6	1		1	5	2	2	3	4		25
	PvCDPK2	5					4		1	1	9		1	1	2	1	25
	PvCDPK20				1	1	1				2	1				1	7
	PvCDPK21	3	1				3		2		4	1		1			15
	PvCDPK24	3					3		1			2		1		1	11
	PvCDPK28			1			2	1		1	7	5	1			1	19
	PvCDPK29.1		2	1		1	6	1		2	4					1	18
	PvCDPK29.2					1	6		2	1	3	1	1			1	16
	PvCDPK3.1		1		1	1	6		1	1	2		1			1	15
	PvCDPK3.2						4		1		4			1	2	1	13
	PvCDPK32	2					2			1	5	2		1	2	1	16
	PvCDPK4.1					1	5			1	1	1	1	1		1	12
	PvCDPK4.2	3				2	6			1	5	2		1	1	2	23
	PvCDPK6	2	2				2			2	4	2	1		2		17
	PvCDPK8	1			1		1				2						5
	PvCDPK9	6	1			1	2			1	3			1		1	16
	Total	42	12	6	4	14	81	6	12	17	91	32	13	15	21	17	383

## Sheet: GO_Analysis1
Celular Component	Gene Count	Value
Nucleus	25	3.95e-10
Cytoplasm	25	1.53e-05
Membrane	19	0.0025
Intracellular anatomical structure	25	0.0077
Molecular Function	Gene Count	Value
Calmodulin-dependent protein kinase activity	25	4.96e-60
Calcium-dependent protein serine/threonine kinase activity	25	4.96e-60
Calcium ion binding	25	6.78e-48
Calmodulin binding	25	9.52e-44
Protein serine kinase activity	25	5.51e-30
ATP binding	25	1.56e-17
Heterocyclic compound binding	25	5.29e-08
Organic cyclic compound binding	25	5.55e-08
Catalytic activity	25	1.18e-06
Binding	25	0.00014
Biological Process	Gene Count	Value
Peptidyl-serine phosphorylation	25	6.31e-52
Protein autophosphorylation	25	4.91e-51
Intracellular signal transduction	25	4.45e-40
Cellular response to stimulus	25	5.92e-27
Regulation of cellular process	25	8.29e-16

[truncated: 5 more sheets: GO_Analysis2, 3D_Protein, PPI, Tissue_Exp, Stress_Exp]
