# Supplementary material for: Genome-wide identification of calcium-dependent protein kinase (CDPK) family members in Phaseolus vulgaris L. and expression analysis during abiotic stresses
Source: PeerJ. 2025 Oct 20;13:e20217. doi: 10.7717/peerj.20217 (PMC12548640; doi:10.7717/peerj.20217)
Supplement: Supplemental Information 2 [file peerj-13-20217-s002.xlsx]

## Sheet: Sayfa1
	forward	reverse	product size	Tm
PvCDPK1.1	ATGAAGACGTGGAAGATGTGAGG	CCCCTTCACATAACTCCATCACAAC	133	62
PvCDPK2	AGATGTATGGAGTGCTGGTGTC	ATCTCTTGTTCCGTTTCTCCCC	81
PvCDPK4.1	GATCATGCACCATTTGTCGGAG	TGCCCCTTCTGAATGATCCTG	135	62
PvCDPK10.1	TGGATGAGCCCGAGATTAAGATG	GCCACGAACTCTCCATAGTCAAG	82	62
PvCDPK20	CTATGTGGCCCCTGAAGTTTTG	CCTGTTCCGTTTCATCCCAAAATG	122	62
PvCDPK29.2	TCTATCTCGGACGCTGCAAAAG	CACTGTCTGGATGCTTTTCTGATG	139	62
