# Supplementary material for: Genome-wide identification of calcium-dependent protein kinase (CDPK) family members in Phaseolus vulgaris L. and expression analysis during abiotic stresses
Source: PeerJ. 2025 Oct 20;13:e20217. doi: 10.7717/peerj.20217 (PMC12548640; doi:10.7717/peerj.20217)
Supplement: Supplemental Information 3 [file peerj-13-20217-s003.xlsx]

## Sheet: SAMPLES LISTS
	SALT	SAMPLE NO	SAMPLE NAME	RNA Quantity (ng/ul)	260/280 values		DROUGHT	SAMPLE NO	SAMPLE NAME	RNA Quantity (ng/ul)	260/280 values
		1	S1E	2446	1.89			1	D1E	2292	1.99
		2	S2E	2327	1.72			2	D2E	2258	1.75
		3	S3E	1291	1.95			3	D3E	1645	1.93
		4	S4E	1272	1.68			4	D4E	2315	1.67
		5	S5E	1639	1.52			5	D5E	1847	1.78
		6	S6E	1445	1.81			6	D6E	1503	1.62
		7	S19E	2272	1.78			7	D13E	1538	1.8
		8	S20E	2222	1.66			8	D14E	1439	1.83
		9	S21E	2234	1.91			9	D15E	867	1.65
		10	S22E	2277	1.38			10	D16E	435	1.82
		11	S23E	2152	1.97			11	D17E	301	1.96
		12	S24E	2142	1.92			12	D18E	853	1.69
		13	S1S	1568	1.85			13	D1S	1724	1.98
		14	S2S	1143	1.97			14	D2S	1389	1.7
		15	S3S	1897	1.68			15	D3S	1826	1.76
		16	S4S	1708	1.9			16	D4S	1400	1.48
		17	S5S	934	1.76			17	D5S	1607	1.59
		18	S6S	1401	1.81			18	D6S	1681	1.8
		19	S19S	1598	1.82			19	D13S	1777	1.9
		20	S20S	2105	1.71			20	D14S	2189	1.84
		21	S21S	2119	1.87			21	D15S	1273	1.92
		22	S22S	2221	1.8			22	D16S	2035	1.99
		23	S23S	1561	1.69			23	D17S	2101	1.82
		24	S24S	2040	1.9			24	D18S	1884	1.87

## Sheet: QPCR RESULTS
SALT									DROUGHT
		Actin	CPDK-1	CPDK-4	CPDK-10	CPDK-20	CPDK-29				Actin	CPDK-1	CPDK-4	CPDK-10	CPDK-20	CPDK-29
0 mM NaCl ROOT	S1E	25.11	28.6833	29.26	24.9733	22.7767	24.24		0% PEG ROOT	D1E	21.77	35.24	27.4133	27.6633	24.5633	27.23
	S2E	23.22	27.8433	28.71	28.6867	24.8133	28.2033			D2E	24.32	36.0767	28.0267	27.7167	24.44	28.11
	S3E	24.56	28.1067	29.4133	29.7033	25.0767	28.0033			D3E	27.42	33.89	27.5833	26.8933	24.7533	27.39
0 mM NaCl LEAF	S4E	21.5167	28.1167	29.3833	29.9167	25.1967	28.7367		0% PEG LEAF	D4E	23.1867	33.46	27.6867	26.83	25.3867	27.55
	S5E	23.95	29.0867	30.0433	27.5767	24.1533	27.6167			D5E	22.5467	33.2067	28.2967	27.5433	25.22	27.44
	S6E	25.2033	28.1067	29.51	27.6767	25.2867	26.92			D6E	23.61	31.6167	27.8233	27.5833	25.51	26.9167
150 mM NaCl ROOT	S19E	22.23	27.8867	28.5433	27.1633	23.85	26.8333		20% PEG ROOT	D13E	26.69	33.07	27.4433	28.41	26.5633	27.01
	S20E	23.14	28.2067	28.0967	27.0867	24.8367	28.4867			D14E	26.49	32.64	26.4967	25.8233	26.7433	27.88
	S21E	23.2	27.9	29.4033	30.7167	24.7833	28.0733			D15E	26.45	31.6767	26.6	26.2333	25.8767	26.3533
150 mM NaCl LEAF	S22E	24.38	28.1267	29.7167	28.76	25.2233	27.9133		20% PEG LEAF	D16E	23.8133	32.9933	26.4667	26.9833	25.63	27.4333
	S23E	22.4767	27.1933	28.65	28.4833	24.94	28.3767			D17E	25.6333	34.1367	26.6667	25.1467	27.5567	27.5267
	S24E	22.8233	28.9267	27.58	28.4833	24.7833	28.9367			D18E	23.4067	33.55	27.2933	26.8867	28.2867	27.46
0 mM NaCl ROOT	S1S	20.43	24.8167	28.12	28.3167	24.7933	27.4533		0% PEG ROOT	D1S	22.81	34.13	26.3467	25.4733	25.91	28.0067
	S2S	21.06	22.9967	28.6267	27.62	24.98	28.0233			D2S	21.46	34.6333	26.5333	26.1267	26.1867	26.7733
	S3S	21.52	22.9133	27.9333	26.9233	24.7267	27.2			D3S	20.63	33.78	26.5	26.9133	26.5	26.8667
0 mM NaCl LEAF	S4S	22.4233	26.86	27.7667	26.6967	23.7533	25.9067		0% PEG LEAF	D4S	24.54	34.65	25.4533	24.7267	25.1233	26.35
	S5S	23.9033	27.0067	26.4467	27.4433	24.3967	26.9533			D5S	24.3933	34.66	25.6567	26.1067	24.7733	27.4067
	S6S	23.43	27.4	28.35	27	24.8467	28.14			D6S	21.5733	33.5333	26.6133	25.86	25.7333	27.54
150 mM NaCl ROOT	S19S	23.01	26.8833	27.4733	27.1133	24.38	26.8333		20% PEG ROOT	D13S	21.34	32.22	25.9	25.53	25.18	27.6067
	S20S	23.57	25.77	25.8967	27.32	24.7567	27.9167			D14S	22.02	32.71	25.6467	25.7867	24.9767	27.0667
	S21S	23.51	26.43	25.8233	25.6167	22.97	24.8833			D15S	23.68	32.2033	25.2	26.1167	24.3933	27.09
150 mM NaCl LEAF	S22S	24.8333	26.31	25.2	26.2367	25.01	27.7233		20% PEG LEAF	D16S	25.3933	32.0967	27.1367	25.1933	23.9967	26.3767
	S23S	25.5	26.3867	25.2233	26.2967	24.62	27.52			D17S	24.5633	33.5067	26.7	25.5533	24.5133	26.0067
	S24S	26.2133	26.8733	26.1367	26.5467	24.53	27.4233			D18S	24.14	32.8433	28.99	25.4033	24.0333	26.0367

## Sheet: 2^-ΔΔCt RESULTS
SALT	SAMPLE NO	SAMPLE NAME	Actin	CPDK-1	ΔCt	ΔΔCt	2^-ΔΔCt	CPDK-4	ΔCt	ΔΔCt	2^-ΔΔCt	CPDK-10	ΔCt	ΔΔCt	2^-ΔΔCt	CPDK-20	ΔCt	ΔΔCt	2^-ΔΔCt	CPDK-29	ΔCt	ΔΔCt	2^-ΔΔCt
	1	S1E	25.11	28.6833	3.57333	0	1	29.26	-4.15	0	1.00	24.9733	-0.136667	0	1.00	22.7767	-2.33333	0	1.00	24.24	-0.87	0	1.00
	2	S2E	23.22	27.8433	4.62333	0	1	28.71	-5.49	0	1.00	28.6867	5.46667	0	1.00	24.8133	1.59333	0	1.00	28.2033	4.98333	0	1.00
	3	S3E	24.56	28.1067	3.54667	0	1	29.4133	-4.85333	0	1.00	29.7033	5.14333	0	1.00	25.0767	0.516667	0	1.00	28.0033	3.44333	0	1.00
	4	S4E	21.5167	28.1167	6.6	0	1	29.3833	-7.86667	0	1.00	29.9167	8.4	0	1.00	25.1967	3.68	0	1.00	28.7367	7.22	0	1.00
	5	S5E	23.95	29.0867	5.13667	0	1	30.0433	-6.09333	0	1.00	27.5767	3.62667	0	1.00	24.1533	0.203333	0	1.00	27.6167	3.66667	0	1.00
	6	S6E	25.2033	28.1067	2.90333	0	1	29.51	-4.30667	0	1.00	27.6767	2.47333	0	1.00	25.2867	0.0833333	0	1.00	26.92	1.71667	0	1.00
	7	S19E	22.23	27.8867	5.65667	1.74222	0.298909	28.5433	-6.31333	-1.48222	2.79379	27.1633	4.93333	1.44222	0.368	23.85	1.62	1.69444	0.308974	26.8333	4.60333	2.08444	0.235787
	8	S20E	23.14	28.2067	5.06667	1.15222	0.449932	28.0967	-4.95667	-0.125556	1.09093	27.0867	3.94667	0.455556	0.729229	24.8367	1.69667	1.77111	0.292983	28.4867	5.34667	2.82778	0.140849
	9	S21E	23.2	27.9	4.7	0.785556	0.580129	29.4033	-6.20333	-1.37222	2.58869	30.7167	7.51667	4.02556	0.0614026	24.7833	1.58333	1.65778	0.316927	28.0733	4.87333	2.35444	0.195543
	10	S22E	24.38	28.1267	3.74667	-1.13333	2.19365	29.7167	-5.33667	0.752222	0.593688	28.76	4.38	-0.453333	1.3692	25.2233	0.843333	-0.478889	1.39367	27.9133	3.53333	-0.667778	1.58862
	11	S23E	22.4767	27.1933	4.71667	-0.163333	1.11987	28.65	-6.17333	-0.0844444	1.06028	28.4833	6.00667	1.17333	0.443396	24.94	2.46333	1.14111	0.45341	28.3767	5.9	1.69889	0.308023
	12	S24E	22.8233	28.9267	6.10333	1.22333	0.428292	27.58	-4.75667	1.33222	0.397156	28.4833	5.66	0.826667	0.56383	24.7833	1.96	0.637778	0.642702	28.9367	6.11333	1.91222	0.265683
	13	S1S	20.43	24.8167	4.38667	0	1	28.12	-7.69	0	1.00	28.3167	7.88667	0	1.00	24.7933	4.36333	0	1.00	27.4533	7.02333	0	1.00
	14	S2S	21.06	22.9967	1.93667	0	1	28.6267	-7.56667	0	1.00	27.62	6.56	0	1.00	24.98	3.92	0	1.00	28.0233	6.96333	0	1.00
	15	S3S	21.52	22.9133	1.39333	0	1	27.9333	-6.41333	0	1.00	26.9233	5.40333	0	1.00	24.7267	3.20667	0	1.00	27.2	5.68	0	1.00
	16	S4S	22.4233	26.86	4.43667	0	1	27.7667	-5.34333	0	1.00	26.6967	4.27333	0	1.00	23.7533	1.33	0	1.00	25.9067	3.48333	0	1.00
	17	S5S	23.9033	27.0067	3.10333	0	1	26.4467	-2.54333	0	1.00	27.4433	3.54	0	1.00	24.3967	0.493333	0	1.00	26.9533	3.05	0	1.00
	18	S6S	23.43	27.4	3.97	0	1	28.35	-4.92	0	1.00	27	3.57	0	1.00	24.8467	1.41667	0	1.00	28.14	4.71	0	1.00
	19	S19S	23.01	26.8833	3.87333	1.30111	0.405814	27.4733	-4.46333	-1.42889	2.69239	27.1133	4.10333	0.783333	0.581023	24.38	1.37	0.697778	0.616521	26.8333	3.82333	0.642222	0.640725
	20	S20S	23.57	25.77	2.2	-0.372222	1.29435	25.8967	-2.32667	0.707778	0.612262	27.32	3.75	0.43	0.742262	24.7567	1.18667	0.514444	0.700062	27.9167	4.34667	1.16556	0.445793
	21	S21S	23.51	26.43	2.92	0.347778	0.785794	25.8233	-2.31333	0.721111	0.60663	25.6167	2.10667	-1.21333	2.31873	22.97	-0.54	-1.21222	2.31694	24.8833	1.37333	-1.80778	3.50103
	22	S22S	24.8333	26.31	1.47667	-2.36	5.1337	25.2	-0.366667	-0.362222	1.2854	26.2367	1.40333	0.558889	0.678825	25.01	0.176667	0.972222	0.50972	27.7233	2.89	0.85	0.554785
	23	S23S	25.5	26.3867	0.886667	-2.95	7.72749	25.2233	0.276667	0.281111	0.822957	26.2967	0.796667	-0.0477778	1.03367	24.62	-0.88	-0.0844444	1.06028	27.52	2.02	-0.02	1.01396
	24	S24S	26.2133	26.8733	0.66	-3.17667	9.04216	26.1367	0.0766667	0.0811111	0.945329	26.5467	0.333333	-0.511111	1.42515	24.53	-1.68333	-0.887778	1.85032	27.4233	1.21	-0.83	1.77769
DROUGHT	SAMPLE NO	SAMPLE NAME	Actin	CPDK-1	ΔCt	ΔΔCt	2^-ΔΔCt	CPDK-4	ΔCt	ΔΔCt	2^-ΔΔCt	CPDK-10	ΔCt	ΔΔCt	2^-ΔΔCt	CPDK-20	ΔCt	ΔΔCt	2^-ΔΔCt	CPDK-29	ΔCt	ΔΔCt	2^-ΔΔCt
	1	D1E	21.77	35.24	13.47	0	1	27.4133	5.64333	0	1	27.6633	5.89333	0	1	24.5633	2.79333	0	1	27.23	5.46	0	1
	2	D2E	24.32	36.0767	11.7567	0	1	28.0267	3.70667	0	1	27.7167	3.39667	0	1	24.44	0.12	0	1	28.11	3.79	0	1
	3	D3E	27.42	33.89	6.47	0	1	27.5833	0.163333	0	1	26.8933	-0.526667	0	1	24.7533	-2.66667	0	1	27.39	-0.03	0	1
	4	D4E	23.1867	33.46	10.2733	0	1	27.6867	4.5	0	1	26.83	3.64333	0	1	25.3867	2.2	0	1	27.55	4.36333	0	1
	5	D5E	22.5467	33.2067	10.66	0	1	28.2967	5.75	0	1	27.5433	4.99667	0	1	25.22	2.67333	0	1	27.44	4.89333	0	1
	6	D6E	23.61	31.6167	8.00667	0	1	27.8233	4.21333	0	1	27.5833	3.97333	0	1	25.51	1.9	0	1	26.9167	3.30667	0	1
	7	D13E	26.69	33.07	6.38	-4.18556	18.1961	27.4433	0.753333	-2.41778	5.34347	28.41	1.72	-1.20111	2.29917	26.5633	-0.126667	-0.208889	1.1558	27.01	0.32	-2.75333	6.74273
	8	D14E	26.49	32.64	6.15	-4.41556	21.341	26.4967	0.00666667	-3.16444	8.96588	25.8233	-0.666667	-3.58778	12.0234	26.7433	0.253333	0.171111	0.888158	27.88	1.39	-1.68333	3.21169
	9	D15E	26.45	31.6767	5.22667	-5.33889	40.473	26.6	0.15	-3.02111	8.11793	26.2333	-0.216667	-3.13778	8.80167	25.8767	-0.573333	-0.655556	1.57522	26.3533	-0.0966667	-3.17	9.00047
	10	D16E	23.8133	32.9933	9.18	-0.466667	1.38191	26.4667	2.65333	-2.16778	4.49331	26.9833	3.17	-1.03444	2.04832	25.63	1.81667	-0.441111	1.35765	27.4333	3.62	-0.567778	1.48224
	11	D17E	25.6333	34.1367	8.50333	-1.14333	2.20891	26.6667	1.03333	-3.78778	13.8113	25.1467	-0.486667	-4.69111	25.8324	27.5567	1.92333	-0.334444	1.26089	27.5267	1.89333	-2.29444	4.90565
	12	D18E	23.4067	33.55	10.1433	0.496667	0.708742	27.2933	3.88667	-0.934444	1.91115	26.8867	3.48	-0.724444	1.65226	28.2867	4.88	2.62222	0.162417	27.46	4.05333	-0.134444	1.09767
	13	D1S	22.81	34.13	11.32	0	1	26.3467	3.53667	0	1	25.4733	2.66333	0	1	25.91	3.1	0	1	28.0067	5.19667	0	1
	14	D2S	21.46	34.6333	13.1733	0	1	26.5333	5.07333	0	1	26.1267	4.66667	0	1	26.1867	4.72667	0	1	26.7733	5.31333	0	1
	15	D3S	20.63	33.78	13.15	0	1	26.5	5.87	0	1	26.9133	6.28333	0	1	26.5	5.87	0	1	26.8667	6.23667	0	1
	16	D4S	24.54	34.65	10.11	0	1	25.4533	0.913333	0	1	24.7267	0.186667	0	1	25.1233	0.583333	0	1	26.35	1.81	0	1
	17	D5S	24.3933	34.66	10.2667	0	1	25.6567	1.26333	0	1	26.1067	1.71333	0	1	24.7733	0.38	0	1	27.4067	3.01333	0	1
	18	D6S	21.5733	33.5333	11.96	0	1	26.6133	5.04	0	1	25.86	4.28667	0	1	25.7333	4.16	0	1	27.54	5.96667	0	1
	19	D13S	21.34	32.22	10.88	0.848889	0.555212	25.9	4.56	1.32444	0.399303	25.53	4.19	0.725556	0.604764	25.18	3.84	1.33667	0.395934	27.6067	6.26667	1.35889	0.389882
	20	D14S	22.02	32.71	10.69	0.658889	0.633366	25.6467	3.62667	0.391111	0.762542	25.7867	3.76667	0.302222	0.811002	24.9767	2.95667	0.453333	0.730353	27.0667	5.04667	0.138889	0.908218
	21	D15S	23.68	32.2033	8.52333	-1.50778	2.84372	25.2	1.52	-1.71556	3.28423	26.1167	2.43667	-1.02778	2.03888	24.3933	0.713333	-1.79	3.45815	27.09	3.41	-1.49778	2.82407
	22	D16S	25.3933	32.0967	6.70333	-1.41333	2.66352	27.1367	1.74333	-1.16667	2.24492	25.1933	-0.2	-0.884444	1.84605	23.9967	-1.39667	-0.878889	1.83896	26.3767	0.983333	-0.457778	1.37342
	23	D17S	24.5633	33.5067	8.94333	0.826667	0.56383	26.7	2.13667	-0.773333	1.70921	25.5533	0.99	0.305556	0.809131	24.5133	-0.05	0.467778	0.723078	26.0067	1.44333	0.00222222	0.998461
	24	D18S	24.14	32.8433	8.70333	0.586667	0.66588	28.99	4.85	1.94	0.260616	25.4033	1.26333	0.578889	0.669479	24.0333	-0.106667	0.411111	0.752044	26.0367	1.89667	0.455556	0.729229
